# Supplementary material for: Neural network activation similarity: a new measure to assist decision making in chemical toxicology
Source: Royal Society of Chemistry journal article supplement (doi:10.1039/d0sc01637c), 2020-01-01
Supplement: d0sc01637c1.xlsx [file d0sc01637c1.xlsx]

## Sheet: 100,100
ADRA2A
	Model Number		TP	FN	TN	FP	ROC-AUC	SE	SP	ACC	MCC	ROC-AUC
[100,100]	21	Train 1	480	36	585	12	0.99	93.0233	97.9899	95.6873	0.913878	0.99
	22	Train 2	491	36	575	11	0.99	93.1689	98.1229	95.7772	0.916037	0.99
0.4	23	Train 3	473	32	595	13	0.99	93.6634	97.8618	95.9569	0.918727	0.99
0.001	24	Train 4	459	33	606	15	0.99	93.2927	97.5845	95.6873	0.912733	0.99
100	25	Train 5	461	35	603	14	0.99	92.9435	97.731	95.5975	0.911195	0.99
		Avg	472.8	34.4	592.8	13	0.99	93.2183	97.858	95.7412	0.914514	0.99
		SD	13.3492	1.81659	12.853	1.58114	0	0.282661	0.211246	0.13626	0.00294351	0
		Validation 1	158	20	175	18	0.97	88.764	90.6736	89.7574	0.79477	0.97
		Validation 2	142	24	199	6	0.96	85.5422	97.0732	91.9137	0.838896	0.96
		Validation 3	158	9	189	15	0.97	94.6108	92.6471	93.531	0.870206	0.97
		Validation 4	140	21	197	13	0.96	86.9565	93.8095	90.8356	0.813163	0.96
		Validation 5	141	19	191	20	0.96	88.125	90.5213	89.4879	0.785882	0.96
		Avg	147.8	18.6	190.2	14.4	0.964	88.7997	92.9449	91.1051	0.820583	0.964
		SD	9.33809	5.68331	9.44458	5.41295	0.00547723	3.47253	2.68847	1.66157	0.0343636	0.00547723
		Test 1	139	9	203	20	0.96	93.9189	91.0314	92.1833	0.840585	0.96
		Test 2	126	23	208	14	0.94	84.5638	93.6937	90.027	0.791453	0.94
		Test 3	148	22	182	19	0.96	87.0588	90.5473	88.9488	0.777222	0.96
		Test 4	171	18	171	11	0.97	90.4762	93.956	92.1833	0.844322	0.97
		Test 5	159	27	180	5	0.97	85.4839	97.2973	91.3747	0.833426	0.97
		Avg	148.6	19.8	188.8	13.8	0.96	88.3003	93.3051	90.9434	0.817402	0.96
		SD	17.4155	6.83374	15.8965	6.14003	0.0122474	3.86454	2.70591	1.42118	0.0308492	0.0122474
ADRB1
	Model Number		TP	FN	TN	FP	ROC-AUC	SE	SP	ACC	MCC	ROC-AUC
[100,100]	21	Train 1	708	42	597	57	0.98	94.4	91.2844	92.9487	0.858302	0.98
	22	Train 2	741	44	570	49	0.98	94.3949	92.084	93.3761	0.865551	0.98
0.4	23	Train 3	680	41	630	53	0.98	94.3135	92.2401	93.3048	0.866063	0.98
0.001	24	Train 4	682	45	623	54	0.98	93.8102	92.0236	92.9487	0.858802	0.98
100	25	Train 5	726	41	581	56	0.98	94.6545	91.2088	93.0912	0.86055	0.98
		Avg	707.4	42.6	600.2	53.8	0.98	94.3146	91.7682	93.1339	0.861854	0.98
		SD	26.7918	1.81659	25.975	3.11448	1.24127e-16	0.309724	0.483395	0.198921	0.00370879	1.24127e-16
		Validation 1	239	14	201	14	0.96	94.4664	93.4884	94.0171	0.879548	0.96
		Validation 2	239	22	195	12	0.97	91.5709	94.2029	92.735	0.854266	0.97
		Validation 3	241	23	191	13	0.97	91.2879	93.6275	92.3077	0.845239	0.97
		Validation 4	250	24	185	9	0.98	91.2409	95.3608	92.9487	0.858182	0.98
		Validation 5	227	11	213	17	0.98	95.3782	92.6087	94.0171	0.880544	0.98
		Avg	239.2	18.8	197	13	0.972	92.7888	93.8576	93.2051	0.863556	0.972
		SD	8.19756	5.89067	10.6771	2.91548	0.0083666	1.97808	1.01587	0.776321	0.0157721	0.0083666
		Test 1	236	21	194	17	0.96	91.8288	91.9431	91.8803	0.836425	0.96
		Test 2	192	22	234	20	0.95	89.7196	92.126	91.0256	0.819089	0.95
		Test 3	253	22	175	18	0.95	92	90.6736	91.453	0.824316	0.95
		Test 4	242	17	193	16	0.96	93.4363	92.3445	92.9487	0.85742	0.96
		Test 5	242	13	193	20	0.96	94.902	90.6103	92.9487	0.857836	0.96
		Avg	233	19	197.8	18.2	0.956	92.3773	91.5395	92.0513	0.839017	0.956
		SD	23.7276	3.937	21.7417	1.78885	0.00547723	1.93661	0.831878	0.873197	0.018116	0.00547723
ADRB2
	Model Number		TP	FN	TN	FP	ROC-AUC	SE	SP	ACC	MCC	ROC-AUC
[100,100]	21	Train 1	921	242	1153	57	0.95	79.1917	95.2893	87.3999	0.756435	0.95
	22	Train 2	912	250	1156	55	0.96	78.4854	95.4583	87.1471	0.752264	0.96
0.4	23	Train 3	916	275	1125	57	0.96	76.9102	95.1777	86.0093	0.732835	0.96
0.001	24	Train 4	968	211	1128	66	0.96	82.1035	94.4724	88.327	0.772148	0.96
100	25	Train 5	763	369	1204	37	0.96	67.4028	97.0185	82.8909	0.680659	0.96
		Avg	896	269.4	1153.2	54.4	0.958	76.8187	95.4832	86.3548	0.738868	0.958
		SD	77.7078	60.1855	31.697	10.6207	0.00447214	5.59028	0.936834	2.10522	0.0354269	0.00447214
		Validation 1	276	115	366	34	0.88	70.5882	91.5	81.1631	0.635879	0.88
		Validation 2	283	108	368	32	0.88	72.3785	92	82.3009	0.657507	0.88
		Validation 3	268	110	385	28	0.9	70.8995	93.2203	82.5537	0.661858	0.9
		Validation 4	292	115	337	47	0.88	71.7445	87.7604	79.5196	0.600961	0.88
		Validation 5	241	137	401	12	0.89	63.7566	97.0944	81.1631	0.651685	0.89
		Avg	272	117	371.4	30.6	0.886	69.8735	92.315	81.3401	0.641578	0.886
		SD	19.4551	11.5974	23.9019	12.6016	0.00894427	3.49125	3.36044	1.20134	0.0247456	0.00894427
		Test 1	296	93	360	42	0.9	76.0925	89.5522	82.933	0.663408	0.9
		Test 2	292	98	363	38	0.89	74.8718	90.5237	82.8066	0.663048	0.89
		Test 3	247	127	393	24	0.87	66.0428	94.2446	80.9102	0.634226	0.87
		Test 4	229	128	393	41	0.87	64.1457	90.553	78.6346	0.574057	0.87
		Test 5	279	154	340	18	0.89	64.4342	94.9721	78.2554	0.610627	0.89
		Avg	268.6	120	369.8	32.6	0.884	69.1174	91.9691	80.708	0.629073	0.884
		SD	29.3309	24.9098	22.9499	10.8995	0.0134164	5.8709	2.45619	2.21978	0.0378377	0.0134164
OPRD1
	Model Number		TP	FN	TN	FP	ROC-AUC	SE	SP	ACC	MCC	ROC-AUC
[100,100]	21	Train 1	1779	42	621	93	0.99	97.6936	86.9748	94.6746	0.866594	0.99
	22	Train 2	1746	50	650	89	0.98	97.216	87.9567	94.5168	0.865783	0.98
0.4	23	Train 3	1761	37	632	105	0.99	97.9422	85.7531	94.3984	0.862304	0.99
0.001	24	Train 4	1753	46	656	80	0.99	97.443	89.1304	95.0296	0.878192	0.99
100	25	Train 5	1723	42	675	95	0.99	97.6204	87.6623	94.5957	0.870808	0.99
		Avg	1752.4	43.4	646.8	92.4	0.988	97.583	87.4955	94.643	0.868736	0.988
		SD	20.5378	4.87852	21.0642	9.09945	0.00447214	0.272432	1.24708	0.238976	0.00609081	0.00447214
		Validation 1	593	24	184	44	0.97	96.1102	80.7018	91.9527	0.791476	0.97
		Validation 2	580	23	198	44	0.97	96.1857	81.8182	92.071	0.802406	0.97
		Validation 3	582	14	202	47	0.97	97.651	81.1245	92.7811	0.823307	0.97
		Validation 4	597	28	187	33	0.97	95.52	85	92.7811	0.81127	0.97
		Validation 5	583	21	193	48	0.96	96.5232	80.083	91.8343	0.79537	0.96
		Avg	587	22	192.8	43.2	0.968	96.398	81.7455	92.284	0.804766	0.968
		SD	7.51665	5.14782	7.46324	5.97495	0.00447214	0.788108	1.92588	0.461387	0.0128118	0.00447214
		Test 1	547	21	234	43	0.97	96.3028	84.4765	92.426	0.826073	0.97
		Test 2	593	14	182	56	0.95	97.6936	76.4706	91.716	0.790363	0.95
		Test 3	583	29	210	23	0.97	95.2614	90.1288	93.8462	0.847279	0.97
		Test 4	559	23	209	54	0.96	96.0481	79.4677	90.8876	0.783435	0.96
		Test 5	620	17	161	47	0.97	97.3312	77.4038	92.426	0.789502	0.97
		Avg	580.4	20.8	199.2	44.6	0.964	96.5274	81.5895	92.2604	0.80733	0.964
		SD	28.7541	5.76194	28.1904	13.1643	0.00894427	0.98602	5.68944	1.08979	0.027946	0.00894427
DRD1
	Model Number		TP	FN	TN	FP	ROC-AUC	SE	SP	ACC	MCC	ROC-AUC
[100,100]	21	Train 1	674	136	1175	19	0.98	83.2099	98.4087	92.2655	0.842104	0.98
	22	Train 2	671	135	1183	15	0.98	83.2506	98.7479	92.515	0.847388	0.98
0.4	23	Train 3	671	133	1180	20	0.97	83.4577	98.3333	92.3653	0.843438	0.97
0.001	24	Train 4	698	116	1165	25	0.97	85.7494	97.8992	92.9641	0.855461	0.97
100	25	Train 5	707	134	1141	22	0.97	84.0666	98.1083	92.2156	0.842963	0.97
		Avg	684.2	130.8	1168.8	20.2	0.974	83.9468	98.2995	92.4651	0.846271	0.974
		SD	17.0499	8.34865	16.9765	3.70135	0.00547723	1.06426	0.320531	0.301473	0.00552369	0.00547723
		Validation 1	218	64	366	20	0.94	77.305	94.8187	87.4251	0.743829	0.94
		Validation 2	204	55	384	25	0.93	78.7645	93.8875	88.024	0.745777	0.93
		Validation 3	210	55	382	21	0.95	79.2453	94.7891	88.6228	0.761486	0.95
		Validation 4	200	51	386	31	0.93	79.6813	92.5659	87.7246	0.735664	0.93
		Validation 5	206	62	374	26	0.93	76.8657	93.5	86.8263	0.724388	0.93
		Avg	207.6	57.4	378.4	24.6	0.936	78.3723	93.9122	87.7246	0.742229	0.936
		SD	6.84105	5.41295	8.29458	4.39318	0.00894427	1.22866	0.945184	0.669481	0.0136694	0.00894427
		Test 1	204	54	382	28	0.93	79.0698	93.1707	87.7246	0.738746	0.93
		Test 2	233	52	367	16	0.93	81.7544	95.8225	89.8204	0.793501	0.93
		Test 3	207	74	376	11	0.93	73.6655	97.1576	87.2754	0.745674	0.93
		Test 4	218	67	359	24	0.93	76.4912	93.7337	86.3772	0.722604	0.93
		Test 5	197	44	402	25	0.95	81.7427	94.1452	89.6707	0.773662	0.95
		Avg	211.8	58.2	377.2	20.8	0.934	78.5447	94.8059	88.1737	0.754837	0.934
		SD	14.0606	12.0913	16.3921	7.04982	0.00894427	3.49388	1.64499	1.5156	0.0284213	0.00894427
DRD2
	Model Number		TP	FN	TN	FP	ROC-AUC	SE	SP	ACC	MCC	ROC-AUC
[100,100]	21	Train 1	3414	36	535	113	0.98	98.9565	82.5617	96.3641	0.858877	0.98
	22	Train 2	3399	25	570	104	0.99	99.2699	84.5697	96.8521	0.882201	0.99
0.4	23	Train 3	3360	37	600	101	0.99	98.9108	85.592	96.6325	0.878228	0.99
0.001	24	Train 4	3369	31	586	112	0.99	99.0882	83.9542	96.5105	0.872916	0.99
150	25	Train 5	3397	21	554	126	0.99	99.3856	81.4706	96.4129	0.866091	0.99
		Avg	3387.8	30	569	111.2	0.988	99.1222	83.6296	96.5544	0.871663	0.988
		SD	22.4878	6.9282	25.6515	9.73139	0.00447214	0.202779	1.6311	0.195522	0.00935735	0.00447214
		Validation 1	1147	13	154	52	0.95	98.8793	74.7573	95.2416	0.80443	0.95
		Validation 2	1133	8	182	43	0.98	99.2989	80.8889	96.2665	0.859531	0.98
		Validation 3	1122	15	182	47	0.98	98.6807	79.476	95.4612	0.831044	0.98
		Validation 4	1106	13	196	51	0.97	98.8382	79.3522	95.3148	0.835945	0.97
		Validation 5	1117	21	554	126	0.97	98.1547	81.4706	91.9142	0.828527	0.97
		Avg	1125	14	253.6	63.8	0.97	98.7704	79.189	94.8396	0.831896	0.97
		SD	15.6684	4.69042	168.62	34.9528	0.0122474	0.413193	2.63839	1.68581	0.019663	0.0122474
		Test 1	1077	7	222	60	0.97	99.3542	78.7234	95.0952	0.845995	0.97
		Test 2	1112	17	167	70	0.95	98.4942	70.4641	93.631	0.764875	0.95
		Test 3	1135	25	174	32	0.98	97.8448	84.466	95.8272	0.834945	0.98
		Test 4	1170	5	148	43	0.96	99.5745	77.4869	96.4861	0.847415	0.96
		Test 5	1132	14	173	47	0.97	98.7784	78.6364	95.5344	0.827846	0.97
		Avg	1125.2	13.6	176.8	50.4	0.966	98.8092	77.9554	95.3148	0.824215	0.966
		SD	34.0837	8.04984	27.3441	14.8425	0.0114018	0.691533	4.9945	1.06841	0.03414	0.0114018
SLC6A3
	Model Number		TP	FN	TN	FP	ROC-AUC	SE	SP	ACC	MCC	ROC-AUC
[100,100]	21	Train 1	1420	66	1150	19	0.99	95.5585	98.3747	96.7985	0.93592	0.99
	22	Train 2	1474	50	1096	35	0.99	96.7192	96.9054	96.7985	0.934709	0.99
0.2	23	Train 3	1425	69	1115	19	0.99	95.3815	98.3245	96.6514	0.932803	0.99
0.001	24	Train 4	1430	63	1125	37	0.99	95.7803	96.8158	96.2335	0.923852	0.99
100	25	Train 5	1452	57	1119	27	0.99	96.2227	97.644	96.8362	0.935967	0.99
		Avg	1440.2	61	1121	27.4	0.99	95.9324	97.6129	96.6636	0.93265	0.99
		SD	22.4989	7.58288	19.5064	8.53229	0	0.540741	0.745578	0.250641	0.00508323	0
		Validation 1	460	42	362	21	0.97	91.6335	94.517	92.8814	0.85693	0.97
		Validation 2	475	34	345	31	0.97	93.3202	91.7553	92.6554	0.84989	0.97
		Validation 3	441	48	367	29	0.96	90.184	92.6768	91.2994	0.825616	0.96
		Validation 4	470	35	350	30	0.97	93.0693	92.1053	92.6554	0.850417	0.97
		Validation 5	466	39	342	41	0.97	92.2772	89.295	90.991	0.816246	0.97
		Avg	462.4	39.6	353.2	30.4	0.968	92.0969	92.0699	92.0965	0.83982	0.968
		SD	13.1643	5.68331	10.849	7.12741	0.00447214	1.2598	1.88126	0.880075	0.017776	0.00447214
		Test 1	465	56	339	25	0.95	89.2514	93.1319	90.8475	0.815478	0.95
		Test 2	434	42	374	35	0.96	91.1765	91.4425	91.2994	0.8253	0.96
		Test 3	457	42	358	28	0.96	91.5832	92.7461	92.0904	0.840275	0.96
		Test 4	485	26	346	28	0.98	94.9119	92.5134	93.8983	0.87489	0.98
		Test 5	463	39	342	41	0.97	92.2311	89.295	90.9605	0.815775	0.97
		Avg	460.8	41	351.8	31.4	0.964	91.8308	91.8258	91.8192	0.834344	0.964
		SD	18.3085	10.6771	14.3597	6.50385	0.0114018	2.04916	1.54735	1.25977	0.0248076	0.0114018
EDNRA
	Model Number		TP	FN	TN	FP	ROC-AUC	SE	SP	ACC	MCC	ROC-AUC
[100,100]	21	Train 1	756	13	667	25	0.99	98.3095	96.3873	97.399	0.947919	0.99
	22	Train 2	768	25	643	25	0.99	96.8474	96.2575	96.5777	0.931049	0.99
0.4	23	Train 3	771	11	651	28	0.99	98.5934	95.8763	97.3306	0.946516	0.99
0.001	24	Train 4	740	16	680	25	0.99	97.8836	96.4539	97.1937	0.943853	0.99
100	25	Train 5	740	13	682	26	0.99	98.2736	96.3277	97.3306	0.946682	0.99
		Avg	755	15.6	664.6	25.8	0.99	97.9815	96.2605	97.1663	0.943204	0.99
		SD	14.7986	5.54977	17.3003	1.30384	0	0.682455	0.226726	0.337406	0.0069547	0
		Validation 1	247	12	211	17	0.96	95.3668	92.5439	94.0452	0.880449	0.96
		Validation 2	260	11	211	5	0.99	95.941	97.6852	96.7146	0.933919	0.99
		Validation 3	243	8	216	20	0.96	96.8127	91.5254	94.2505	0.885808	0.96
		Validation 4	240	7	230	10	0.96	97.166	95.8333	96.5092	0.930229	0.96
		Validation 5	249	10	219	9	0.99	96.139	96.0526	96.0986	0.921682	0.99
		Avg	247.8	9.6	217.4	12.2	0.972	96.2851	94.7281	95.5236	0.910417	0.972
		SD	7.66159	2.07364	7.82943	6.14003	0.0164317	0.713696	2.58594	1.2774	0.0253744	0.0164317
		Test 1	252	5	219	11	0.98	98.0545	95.2174	96.7146	0.934285	0.98
		Test 2	213	8	258	8	0.98	96.3801	96.9925	96.7146	0.933726	0.98
		Test 3	246	6	221	14	0.98	97.619	94.0426	95.8932	0.918168	0.98
		Test 4	263	19	197	8	0.96	93.2624	96.0976	94.4559	0.888041	0.96
		Test 5	261	12	203	11	0.94	95.6044	94.8598	95.2772	0.904193	0.94
		Avg	247	10	219.6	10.4	0.968	96.1841	95.442	95.8111	0.915683	0.968
		SD	20.2114	5.70088	23.7866	2.50998	0.0178885	1.90185	1.13816	0.969669	0.0198358	0.0178885
NR3C1
	Model Number		TP	FN	TN	FP	ROC-AUC	SE	SP	ACC	MCC	ROC-AUC
[100,100]	21	Train 1	1328	434	4201	31	0.95	75.3689	99.2675	92.2422	0.812067	0.95
	22	Train 2	1310	502	4169	13	0.95	72.2958	99.6891	91.4081	0.797128	0.95
0.3	23	Train 3	1363	465	4153	13	0.95	74.5624	99.688	92.0254	0.812849	0.95
0.001	24	Train 4	1370	448	4154	22	0.94	75.3575	99.4732	92.1588	0.814637	0.94
100	25	Train 5	1389	480	4108	17	0.95	74.3178	99.5879	91.7084	0.807961	0.95
		Avg	1352	465.8	4157	19.2	0.948	74.3805	99.5411	91.9086	0.808928	0.948
		SD	32.2258	26.6496	33.5634	7.56307	0.00447214	1.25643	0.176881	0.345752	0.00703562	0.00447214
		Validation 1	427	173	1376	22	0.9	71.1667	98.4263	90.2402	0.764268	0.9
		Validation 2	391	200	1397	10	0.88	66.1591	99.2893	89.4895	0.745787	0.88
		Validation 3	414	203	1370	11	0.9	67.0989	99.2035	89.2893	0.74853	0.9
		Validation 4	412	175	1400	11	0.9	70.1874	99.2204	90.6907	0.773892	0.9
		Validation 5	418	170	1385	25	0.9	71.0884	98.227	90.2402	0.760433	0.9
		Avg	412.4	184.2	1385.6	15.8	0.896	69.1401	98.8733	89.99	0.758582	0.896
		SD	13.2778	15.928	12.973	7.12039	0.00894427	2.34804	0.504997	0.582605	0.0115641	0.00894427
		Test 1	490	166	1312	30	0.89	74.6951	97.7645	90.1902	0.775507	0.89
		Test 2	424	191	1374	9	0.9	68.9431	99.3492	89.99	0.765102	0.9
		Test 3	362	211	1414	11	0.88	63.1763	99.2281	88.8889	0.7243	0.88
		Test 4	430	183	1369	16	0.89	70.1468	98.8448	90.04	0.764078	0.89
		Test 5	401	160	1413	24	0.89	71.4795	98.3299	90.7908	0.766593	0.89
		Avg	421.4	182.2	1376.4	18	0.89	69.6882	98.7033	89.98	0.759116	0.89
		SD	46.7204	20.3887	41.7169	8.86002	0.00707107	4.22637	0.658291	0.688438	0.0199823	0.00707107
HRH1
	Model Number		TP	FN	TN	FP	ROC-AUC	SE	SP	ACC	MCC	ROC-AUC
[100,100]	21	Train 1	716	36	654	22	0.99	95.2128	96.7456	95.9384	0.918799	0.99
	22	Train 2	760	25	594	49	0.99	96.8153	92.3795	94.8179	0.895489	0.99
0.4	23	Train 3	714	39	645	30	0.99	94.8207	95.5556	95.1681	0.903211	0.99
0.001	24	Train 4	758	34	598	38	0.99	95.7071	94.0252	94.958	0.897893	0.99
100	25	Train 5	747	36	626	19	0.99	95.4023	97.0543	96.1485	0.922688	0.99
		Avg	739	34	623.4	31.6	0.99	95.5916	95.152	95.4062	0.907616	0.99
		SD	22.4722	5.33854	27.0148	12.2188	0	0.755704	1.95433	0.599548	0.012382	0
		Validation 1	235	16	212	13	0.98	93.6255	94.2222	93.9076	0.877941	0.98
		Validation 2	220	14	208	34	0.96	94.0171	85.9504	89.916	0.801375	0.96
		Validation 3	225	19	218	14	0.99	92.2131	93.9655	93.0672	0.86152	0.99
		Validation 4	238	11	208	19	0.98	95.5823	91.63	93.6975	0.87398	0.98
		Validation 5	234	23	202	17	0.97	91.0506	92.2374	91.5966	0.831463	0.97
		Avg	230.4	16.6	209.6	19.4	0.976	93.2977	91.6011	92.437	0.849256	0.976
		SD	7.56968	4.61519	5.89915	8.50294	0.0114018	1.73712	3.34652	1.67409	0.0323794	0.0114018
		Test 1	242	30	172	32	0.96	88.9706	84.3137	86.9748	0.733769	0.96
		Test 2	240	16	206	14	0.98	93.75	93.6364	93.6975	0.873337	0.98
		Test 3	260	18	181	17	0.98	93.5252	91.4141	92.6471	0.848784	0.98
		Test 4	218	16	222	20	0.97	93.1624	91.7355	92.437	0.848859	0.97
		Test 5	213	22	228	13	0.95	90.6383	94.6058	92.6471	0.853459	0.95
		Avg	234.6	20.4	201.8	19.2	0.968	92.0093	91.1411	91.6807	0.831642	0.968
		SD	19.1781	5.89915	24.6617	7.66159	0.0130384	2.10778	4.03954	2.67641	0.0556412	0.0130384
OPRM1
	Model Number		TP	FN	TN	FP	ROC-AUC	SE	SP	ACC	MCC	ROC-AUC
[100,100]	21	Train 1	2096	73	1352	28	0.99	96.6344	97.971	97.1541	0.940807	0.99
	22	Train 2	2107	43	1348	51	0.99	98	96.3545	97.3514	0.944499	0.99
0.2	23	Train 3	2107	41	1346	55	0.99	98.0912	96.0742	97.295	0.943326	0.99
0.001	24	Train 4	2146	52	1309	42	0.99	97.6342	96.8912	97.3514	0.943925	0.99
100	25	Train 5	2139	43	1316	51	0.99	98.0293	96.2692	97.3514	0.944028	0.99
		Avg	2119	50.4	1334.2	45.4	0.99	97.6778	96.712	97.3006	0.943317	0.99
		SD	22.0567	13.3342	20.0798	10.8305	0	0.610107	0.76613	0.0854649	0.00146388	0
		Validation 1	685	13	435	29	0.98	98.1375	93.75	96.3855	0.924603	0.98
		Validation 2	696	30	417	40	0.98	95.8678	91.2473	94.0828	0.874836	0.98
		Validation 3	685	28	424	46	0.98	96.0729	90.2128	93.7447	0.86897	0.98
		Validation 4	703	26	422	32	0.98	96.4335	92.9515	95.0972	0.896136	0.98
		Validation 5	666	40	428	49	0.98	94.3343	89.7275	92.4768	0.843304	0.98
		Avg	687	27.4	425.2	39.2	0.98	96.1692	91.5778	94.3574	0.88157	0.98
		SD	14.0178	9.68504	6.76018	8.64292	1.24127e-16	1.36118	1.73219	1.4704	0.0305467	1.24127e-16
		Test 1	678	44	427	34	0.98	93.9058	92.6247	93.4066	0.862061	0.98
		Test 2	701	33	415	34	0.98	95.5041	92.4276	94.3364	0.879699	0.98
		Test 3	726	23	388	46	0.98	96.9292	89.4009	94.1674	0.873814	0.98
		Test 4	654	29	460	40	0.98	95.754	92	94.1674	0.880295	0.98
		Test 5	692	30	421	40	0.98	95.8449	91.3232	94.0828	0.875251	0.98
		Avg	690.2	31.8	422.2	38.8	0.98	95.5876	91.5553	94.0321	0.874224	0.98
		SD	26.7432	7.72658	25.8592	5.01996	1.24127e-16	1.08734	1.30361	0.36161	0.00734831	1.24127e-16
CHRM1
	Model Number		TP	FN	TN	FP	ROC-AUC	SE	SP	ACC	MCC	ROC-AUC
[100,100]	21	Train 1	1213	32	637	71	0.99	97.4297	89.9718	94.7261	0.885369	0.99
	22	Train 2	1206	30	651	66	0.98	97.5728	90.795	95.0845	0.893811	0.98
0.4	23	Train 3	1153	38	710	52	0.99	96.8094	93.1759	95.3917	0.902943	0.99
0.001	24	Train 4	1185	27	661	80	0.99	97.7723	89.2038	94.5212	0.883529	0.99
100	25	Train 5	1143	40	722	48	0.99	96.6188	93.7662	95.4941	0.905526	0.99
		Avg	1180	33.4	676.2	63.4	0.988	97.2406	91.3825	95.0435	0.894236	0.988
		SD	31.1769	5.45894	37.5593	13.2966	0.00447214	0.500355	1.99878	0.418178	0.00995885	0.00447214
		Validation 1	383	18	202	48	0.95	95.5112	80.8	89.8618	0.784658	0.95
		Validation 2	399	14	201	37	0.96	96.6102	84.4538	92.1659	0.830097	0.96
		Validation 3	378	24	216	33	0.96	94.0299	86.747	91.2442	0.813716	0.96
		Validation 4	354	15	239	43	0.96	95.935	84.7518	91.0906	0.819649	0.96
		Validation 5	379	25	218	29	0.95	93.8119	88.2591	91.7051	0.823371	0.95
		Avg	378.6	19.2	215.2	38	0.956	95.1796	85.0023	91.2135	0.814298	0.956
		SD	16.1338	5.06952	15.4175	7.61577	0.00547723	1.21652	2.81397	0.864866	0.0176026	0.00547723
		Test 1	347	21	248	35	0.96	94.2935	87.6325	91.3978	0.824766	0.96
		Test 2	348	17	248	38	0.96	95.3425	86.7133	91.5515	0.828938	0.96
		Test 3	394	27	190	40	0.93	93.5867	82.6087	89.7081	0.772608	0.93
		Test 4	421	12	186	32	0.97	97.2286	85.3211	93.2412	0.846849	0.97
		Test 5	392	35	198	26	0.97	91.8033	88.3929	90.6298	0.79474	0.97
		Avg	380.4	22.4	214	34.2	0.958	94.4509	86.1337	91.3057	0.81358	0.958
		SD	32.145	8.93308	31.3369	5.49545	0.0164317	2.01818	2.27882	1.30614	0.0295868	0.0164317
CHRM2
	Model Number		TP	FN	TN	FP	ROC-AUC	SE	SP	ACC	MCC	ROC-AUC
[100,100]	21	Train 1	917	56	1191	35	0.99	94.2446	97.1452	95.8618	0.91611	0.99
	22	Train 2	937	54	1180	28	0.99	94.551	97.6821	96.271	0.924774	0.99
0.4	23	Train 3	873	103	1210	13	0.99	89.4467	98.937	94.7249	0.895285	0.99
0.001	24	Train 4	940	40	1169	50	0.99	95.9184	95.8983	95.9072	0.917288	0.99
100	25	Train 5	956	43	1171	29	0.99	95.6957	97.5833	96.7258	0.933964	0.99
		Avg	924.6	59.2	1184.2	31	0.99	93.9713	97.4492	95.8981	0.917484	0.99
		SD	32.0047	25.4303	16.8434	13.3604	0	2.62903	1.09358	0.741957	0.0143129	0
		Validation 1	294	32	388	19	0.98	90.184	95.3317	93.0423	0.859123	0.98
		Validation 2	293	25	396	19	0.98	92.1384	95.4217	93.9973	0.877658	0.98
		Validation 3	279	60	383	11	0.97	82.3009	97.2081	90.3138	0.810706	0.97
		Validation 4	288	31	386	28	0.97	90.2821	93.2367	91.9509	0.83612	0.97
		Validation 5	281	30	404	18	0.98	90.3537	95.7346	93.4516	0.865765	0.98
		Avg	287	35.6	391.4	19	0.976	89.0518	95.3866	92.5512	0.849874	0.976
		SD	6.81909	13.9032	8.53229	6.04152	0.00547723	3.8598	1.41997	1.45854	0.0266145	0.00547723
		Test 1	300	34	386	13	0.98	89.8204	96.7419	93.588	0.871548	0.98
		Test 2	291	33	390	19	0.98	89.8148	95.3545	92.9059	0.856183	0.98
		Test 3	248	70	403	12	0.97	77.9874	97.1084	88.8131	0.777922	0.97
		Test 4	298	36	374	25	0.97	89.2216	93.7343	91.678	0.832173	0.97
		Test 5	289	34	382	28	0.96	89.4737	93.1707	91.5416	0.828191	0.96
		Avg	285.2	41.4	387	19.4	0.972	87.2636	95.222	91.7053	0.833203	0.972
		SD	21.3002	16.025	10.7238	7.09225	0.0083666	5.19161	1.75407	1.82882	0.0356388	0.0083666
CHRM3
	Model Number		TP	FN	TN	FP	ROC-AUC	SE	SP	ACC	MCC	ROC-AUC
[100,100]	21	Train 1	872	44	647	27	0.99	95.1965	95.9941	95.5346	0.909094	0.99
	22	Train 2	884	42	629	35	0.99	95.4644	94.7289	95.1572	0.900626	0.99
0.4	23	Train 3	868	37	640	45	0.99	95.9116	93.4307	94.8428	0.89474	0.99
0.001	24	Train 4	886	37	628	39	0.99	95.9913	94.1529	95.2201	0.901821	0.99
100	25	Train 5	907	30	609	44	0.99	96.7983	93.2619	95.3459	0.903688	0.99
		Avg	883.4	38	630.6	38	0.99	95.8724	94.3137	95.2201	0.901994	0.99
		SD	15.2578	5.43139	14.4326	7.34847	0	0.611614	1.1077	0.255473	0.00519136	0
		Validation 1	292	26	194	18	0.97	91.8239	91.5094	91.6981	0.82853	0.97
		Validation 2	280	21	204	25	0.97	93.0233	89.083	91.3208	0.822879	0.97
		Validation 3	283	22	199	26	0.96	92.7869	88.4444	90.9434	0.814309	0.96
		Validation 4	288	16	201	25	0.97	94.7368	88.9381	92.2642	0.841558	0.97
		Validation 5	283	24	195	28	0.96	92.1824	87.4439	90.1887	0.798319	0.96
		Avg	285.2	21.8	198.6	24.4	0.966	92.9107	89.0838	91.283	0.821119	0.966
		SD	4.76445	3.76829	4.15933	3.78153	0.00547723	1.12631	1.50024	0.782507	0.0161401	0.00547723
		Test 1	279	24	208	19	0.97	92.0792	91.63	91.8868	0.83494	0.97
		Test 2	278	32	198	22	0.96	89.6774	90	89.8113	0.792142	0.96
		Test 3	309	18	170	33	0.97	94.4954	83.7438	90.3774	0.794977	0.97
		Test 4	288	16	201	25	0.97	94.7368	88.9381	92.2642	0.841558	0.97
		Test 5	274	19	204	33	0.95	93.5154	86.0759	90.1887	0.801589	0.95
		Avg	285.6	21.8	196.2	26.4	0.964	92.9008	88.0776	90.9057	0.813041	0.964
		SD	14.0464	6.41872	15.1063	6.38749	0.00894427	2.08307	3.15608	1.09532	0.0233827	0.00894427
SLC6A2
	Model Number		TP	FN	TN	FP	ROC-AUC	SE	SP	ACC	MCC	ROC-AUC
[100,100]	21	Train 1	1668	62	1118	62	0.99	96.4162	94.7458	95.7388	0.911619	0.99
	22	Train 2	1684	67	1115	44	0.99	96.1736	96.2036	96.1856	0.920808	0.99
0.4	23	Train 3	1677	92	1099	42	0.99	94.7993	96.319	95.3952	0.904729	0.99
0.001	24	Train 4	1689	76	1095	50	0.99	95.6941	95.6332	95.6701	0.909803	0.99
100	25	Train 5	1654	97	1122	37	0.99	94.4603	96.8076	95.3952	0.905585	0.99
		Avg	1674.4	78.8	1109.8	47	0.99	95.5087	95.9418	95.677	0.910509	0.99
		SD	13.8672	15.2872	12.0291	9.59166	0	0.851813	0.788383	0.324556	0.00643146	0
		Validation 1	541	37	347	45	0.97	93.5986	88.5204	91.5464	0.824017	0.97
		Validation 2	553	36	360	21	0.97	93.8879	94.4882	94.1237	0.878115	0.97
		Validation 3	534	31	371	34	0.97	94.5133	91.6049	93.299	0.862104	0.97
		Validation 4	549	31	360	30	0.97	94.6552	92.3077	93.7113	0.869266	0.97
		Validation 5	525	37	368	40	0.97	93.4164	90.1961	92.0619	0.836985	0.97
		Avg	540.4	34.4	361.2	34	0.97	94.0143	91.4235	92.9485	0.854097	0.97
		SD	11.3049	3.1305	9.31128	9.24662	0	0.549084	2.24397	1.09976	0.0227415	0
		Test 1	571	31	326	42	0.97	94.8505	88.587	92.4742	0.839496	0.97
		Test 2	524	46	373	27	0.97	91.9298	93.25	92.4742	0.846489	0.97
		Test 3	544	32	363	31	0.97	94.4444	92.132	93.5052	0.865419	0.97
		Test 4	519	46	377	28	0.97	91.8584	93.0864	92.3711	0.844743	0.97
		Test 5	579	18	343	30	0.98	96.9849	91.9571	95.0515	0.895131	0.98
		Avg	547.4	34.6	356.4	31.6	0.972	94.0136	91.8025	93.1753	0.858256	0.972
		SD	27.0241	11.7813	21.4895	6.02495	0.00447214	2.16228	1.8852	1.1466	0.0228255	0.00447214
HTR2A
	Model Number		TP	FN	TN	FP	ROC-AUC	SE	SP	ACC	MCC	ROC-AUC
[100,100]	21	Train 1	2204	21	609	40	0.99	99.0562	93.8367	97.8775	0.938832	0.99
	22	Train 2	2225	27	585	37	0.99	98.8011	94.0514	97.7731	0.934009	0.99
0.4	23	Train 3	2224	22	587	41	0.99	99.0205	93.4713	97.8079	0.935288	0.99
0.001	24	Train 4	2244	18	556	56	0.99	99.2042	90.8497	97.4252	0.922157	0.99
100	25	Train 5	2217	20	586	51	0.99	99.1059	91.9937	97.5296	0.927602	0.99
		Avg	2222.8	21.6	584.6	45	0.99	99.0376	92.8406	97.6827	0.931578	0.99
		SD	14.5155	3.36155	18.8494	8.09321	0	0.149188	1.37269	0.194664	0.0066495	0
		Validation 1	770	8	151	8	0.98	98.9717	94.9686	98.2924	0.939403	0.98
		Validation 2	745	15	180	18	0.98	98.0263	90.9091	96.5553	0.894406	0.98
		Validation 3	742	8	190	18	0.99	98.9333	91.3462	97.286	0.919204	0.99
		Validation 4	731	8	182	37	0.98	98.9175	83.105	95.3027	0.863813	0.98
		Validation 5	767	12	151	28	0.99	98.4596	84.3575	95.8246	0.859089	0.99
		Avg	751	10.2	170.8	21.8	0.984	98.6617	88.9373	96.6522	0.895183	0.984
		SD	16.8375	3.19374	18.4581	11.0544	0.00547723	0.412275	5.02634	1.184	0.0347127	0.00547723
		Test 1	745	9	174	30	0.97	98.8064	85.2941	95.929	0.875836	0.97
		Test 2	729	16	183	30	0.98	97.8523	85.9155	95.1983	0.858614	0.98
		Test 3	750	11	171	26	0.98	98.5545	86.802	96.1378	0.879419	0.98
		Test 4	746	10	176	26	0.98	98.6772	87.1287	96.2422	0.884889	0.98
		Test 5	731	10	197	20	0.98	98.6505	90.7834	96.8685	0.90957	0.98
		Avg	740.2	11.2	180.2	26.4	0.978	98.5082	87.1848	96.0752	0.881666	0.978
		SD	9.52365	2.77489	10.3779	4.09878	0.00447214	0.377495	2.13808	0.602361	0.0184353	0.00447214
HTR3A
	Model Number		TP	FN	TN	FP	ROC-AUC	SE	SP	ACC	MCC	ROC-AUC
[100,100]	21	Train 1	245	23	632	3	0.99	91.4179	99.5276	97.1207	0.93087	0.99
	22	Train 2	217	39	643	4	0.98	84.7656	99.3818	95.2381	0.882113	0.98
0.4	23	Train 3	243	31	623	6	0.98	88.6861	99.0461	95.9025	0.90255	0.98
0.001	24	Train 4	251	29	612	11	0.98	89.6429	98.2343	95.5703	0.895611	0.98
100	25	Train 5	193	65	644	1	0.99	74.8062	99.845	92.691	0.821112	0.99
		Avg	229.8	37.4	630.8	5	0.984	85.8637	99.2069	95.3045	0.886451	0.984
		SD	24.3557	16.456	13.5904	3.80789	0.00547723	6.64401	0.614864	1.62493	0.0406329	0.00547723
		Validation 1	69	16	213	3	0.97	81.1765	98.6111	93.6877	0.841953	0.97
		Validation 2	77	17	202	5	0.96	81.9149	97.5845	92.691	0.827531	0.96
		Validation 3	71	24	204	2	0.95	74.7368	99.0291	91.3621	0.799876	0.95
		Validation 4	77	11	204	9	0.97	87.5	95.7746	93.3555	0.838447	0.97
		Validation 5	77	29	195	0	0.98	72.6415	100	90.3654	0.795217	0.98
		Avg	74.2	19.4	203.6	3.8	0.966	79.5939	98.1999	92.2924	0.820605	0.966
		SD	3.89872	7.09225	6.42651	3.42053	0.0114018	5.965	1.60916	1.39772	0.021773	0.0114018
		Test 1	77	21	198	5	0.95	78.5714	97.5369	91.3621	0.801059	0.95
		Test 2	90	11	197	3	0.98	89.1089	98.5	95.3488	0.895263	0.98
		Test 3	67	15	217	2	0.98	81.7073	99.0868	94.3522	0.855736	0.98
		Test 4	75	8	209	9	0.98	90.3614	95.8716	94.3522	0.859155	0.98
		Test 5	46	41	214	0	0.93	52.8736	100	86.3787	0.666126	0.93
		Avg	71	19.2	207	3.8	0.964	78.5245	98.1991	92.3588	0.815468	0.964
		SD	16.2327	13.1225	9.13783	3.42053	0.0230217	15.1678	1.57937	3.66203	0.0900113	0.0230217
LCK
	Model Number		TP	FN	TN	FP	ROC-AUC	SE	SP	ACC	MCC	ROC-AUC
[100,100]	21	Train 1	994	26	293	40	0.98	97.451	87.988	95.122	0.867007	0.98
	22	Train 2	998	22	277	56	0.98	97.8431	83.1832	94.235	0.841187	0.98
0.4	23	Train 3	1013	19	263	58	0.99	98.1589	81.9315	94.3089	0.83879	0.99
0.001	24	Train 4	1011	22	271	49	0.98	97.8703	84.6875	94.7524	0.851719	0.98
100	25	Train 5	1059	14	229	51	0.99	98.6952	81.7857	95.1959	0.849391	0.99
		Avg	1015	20.6	266.6	50.8	0.984	98.0037	83.9152	94.7228	0.849619	0.984
		SD	25.9133	4.44972	23.7234	7.04982	0.00547723	0.461359	2.5588	0.445303	0.0111262	0.00547723
		Validation 1	338	11	86	16	0.97	96.8481	84.3137	94.0133	0.826375	0.97
		Validation 2	334	14	79	24	0.94	95.977	76.699	91.5743	0.754078	0.94
		Validation 3	329	9	79	34	0.94	97.3373	69.9115	90.4656	0.735339	0.94
		Validation 4	342	13	77	19	0.96	96.338	80.2083	92.9047	0.78397	0.96
		Validation 5	353	7	72	19	0.97	98.0556	79.1209	94.235	0.814839	0.97
		Avg	339.2	10.8	78.6	22.4	0.956	96.9112	78.0507	92.6386	0.78292	0.956
		SD	9.09395	2.86356	5.02991	7.09225	0.0151658	0.821021	5.31742	1.60964	0.038743	0.0151658
		Test 1	355	8	61	27	0.94	97.7961	69.3182	92.2395	0.738846	0.94
		Test 2	360	4	64	23	0.98	98.9011	73.5632	94.0133	0.799062	0.98
		Test 3	353	9	64	25	0.94	97.5138	71.9101	92.4612	0.750155	0.94
		Test 4	331	13	85	22	0.95	96.2209	79.4393	92.2395	0.780437	0.95
		Test 5	284	15	112	40	0.93	94.9833	73.6842	87.8049	0.721663	0.93
		Avg	336.6	9.8	77.2	27.4	0.948	97.0831	73.583	91.7517	0.758033	0.948
		SD	31.4372	4.32435	21.6956	7.30068	0.0192354	1.51259	3.71798	2.32763	0.0313783	0.0192354
AVPR1A
	Model Number		TP	FN	TN	FP	ROC-AUC	SE	SP	ACC	MCC	ROC-AUC
[100,100]	21	Train 1	359	10	632	4	0.99	97.29	99.3711	98.607	0.970001	0.99
	22	Train 2	389	11	600	5	0.99	97.25	99.1736	98.408	0.966768	0.99
0.4	23	Train 3	361	9	630	5	0.99	97.5676	99.2126	98.607	0.970025	0.99
0.001	24	Train 4	349	8	635	13	0.99	97.7591	97.9938	97.9104	0.954583	0.99
100	25	Train 5	370	8	622	5	0.99	97.8836	99.2026	98.7065	0.972414	0.99
		Avg	365.6	9.2	623.8	6.4	0.99	97.55	98.9907	98.4478	0.966758	0.99
		SD	15.0599	1.30384	14.1492	3.71484	0	0.279703	0.562581	0.319339	0.0070958	0
		Validation 1	113	5	208	9	0.99	95.7627	95.8525	95.8209	0.909429	0.99
		Validation 2	101	8	219	7	0.99	92.6606	96.9027	95.5224	0.897785	0.99
		Validation 3	124	7	196	8	0.99	94.6565	96.0784	95.5224	0.906129	0.99
		Validation 4	117	3	210	5	0.98	97.5	97.6744	97.6119	0.948332	0.98
		Validation 5	119	5	208	3	0.98	95.9677	98.5782	97.6119	0.948692	0.98
		Avg	114.8	5.6	208.2	6.4	0.986	95.3095	97.0172	96.4179	0.922073	0.986
		SD	8.67179	1.94936	8.19756	2.40832	0.00547723	1.79446	1.13132	1.09679	0.0245055	0.00547723
		Test 1	129	3	197	6	0.99	97.7273	97.0443	97.3134	0.944129	0.99
		Test 2	103	7	220	5	0.99	93.6364	97.7778	96.4179	0.918494	0.99
		Test 3	112	6	206	11	0.97	94.9153	94.9309	94.9254	0.890327	0.97
		Test 4	137	5	187	6	0.99	96.4789	96.8912	96.7164	0.93285	0.99
		Test 5	104	13	214	4	0.98	88.8889	98.1651	94.9254	0.887943	0.98
		Avg	117	6.8	204.8	6.4	0.984	94.3293	96.9619	96.0597	0.914749	0.984
		SD	15.2807	3.76829	13.1795	2.70185	0.00894427	3.41279	1.25003	1.08453	0.0250989	0.00894427
AGTR1
	Model Number		TP	FN	TN	FP	ROC-AUC	SE	SP	ACC	MCC	ROC-AUC
[100,100]	21	Train 1	394	56	740	1	0.99	87.5556	99.865	95.2141	0.900273	0.99
	22	Train 2	418	65	708	0	0.99	86.5424	100	94.5424	0.89031	0.99
0.4	23	Train 3	418	67	706	0	0.99	86.1856	100	94.3745	0.887217	0.99
0.001	24	Train 4	406	72	713	0	0.99	84.9372	100	93.9547	0.878333	0.99
100	25	Train 5	473	48	670	0	0.99	90.7869	100	95.9698	0.920422	0.99
		Avg	421.8	61.6	707.4	0.2	0.99	87.2016	99.973	94.8111	0.895311	0.99
		SD	30.3018	9.5551	24.976	0.447214	0	2.21213	0.0603527	0.79077	0.0160776	0
		Validation 1	126	30	240	1	0.96	80.7692	99.5851	92.1914	0.841388	0.96
		Validation 2	145	19	230	3	0.99	88.4146	98.7124	94.4584	0.887202	0.99
		Validation 3	128	23	246	0	0.98	84.7682	100	94.2065	0.880457	0.98
		Validation 4	135	20	239	3	0.97	87.0968	98.7603	94.2065	0.87955	0.97
		Validation 5	154	27	214	2	0.96	85.0829	99.0741	92.6952	0.858194	0.96
		Avg	137.6	23.8	233.8	1.8	0.972	85.2263	99.2264	93.5516	0.869358	0.972
		SD	11.8025	4.65833	12.4579	1.30384	0.0130384	2.90517	0.554903	1.03244	0.0190554	0.0130384
		Test 1	171	29	195	2	0.98	85.5	98.9848	92.1914	0.851882	0.98
		Test 2	145	14	236	2	0.98	91.195	99.1597	95.9698	0.916872	0.98
		Test 3	137	33	226	1	0.96	80.5882	99.5595	91.4358	0.832797	0.96
		Test 4	145	28	223	1	0.98	83.815	99.5536	92.6952	0.857307	0.98
		Test 5	75	29	290	3	0.97	72.1154	98.9761	91.9395	0.78673	0.97
		Avg	134.6	26.6	234	1.8	0.974	82.6427	99.2467	92.8463	0.849117	0.974
		SD	35.7043	7.30068	34.8066	0.83666	0.00894427	7.03074	0.292146	1.80413	0.0469681	0.00894427
AKT1
	Model Number		TP	FN	TN	FP	ROC-AUC	SE	SP	ACC	MCC	ROC-AUC
[100,100]	21	Train 1	1554	41	738	58	0.99	97.4295	92.7136	95.8595	0.906396	0.99
	22	Train 2	1612	36	679	64	0.98	97.8155	91.3863	95.8176	0.901689	0.98
0.4	23	Train 3	1628	46	681	36	0.99	97.2521	94.9791	96.5705	0.918695	0.99
0.001	24	Train 4	1661	35	643	52	0.99	97.9363	92.518	96.3614	0.911257	0.99
100	25	Train 5	1661	41	637	52	0.98	97.5911	92.4528	96.1104	0.904795	0.98
		Avg	1623.2	39.8	675.6	52.4	0.986	97.6049	92.8099	96.1439	0.908566	0.986
		SD	44.1441	4.43847	40.2716	10.4307	0.00547723	0.27823	1.31853	0.323153	0.00663439	0.00547723
		Validation 1	532	21	218	26	0.97	96.2025	89.3443	94.1029	0.860489	0.97
		Validation 2	530	17	217	33	0.98	96.8921	86.8	93.7265	0.85268	0.98
		Validation 3	522	19	242	14	0.99	96.488	94.5312	95.8595	0.905627	0.99
		Validation 4	530	18	216	33	0.99	96.7153	86.747	93.601	0.849412	0.99
		Validation 5	530	26	221	20	0.98	95.3237	91.7012	94.2284	0.864291	0.98
		Avg	528.8	20.2	222.8	25.2	0.982	96.3243	89.8247	94.3036	0.8665	0.982
		SD	3.89872	3.56371	10.895	8.28855	0.0083666	0.616053	3.33635	0.907387	0.0226655	0.0083666
		Test 1	602	15	165	15	0.98	97.5689	91.6667	96.2359	0.892355	0.98
		Test 2	547	23	204	23	0.97	95.9649	89.8678	94.2284	0.858328	0.97
		Test 3	523	27	204	43	0.95	95.0909	82.5911	91.2171	0.791837	0.95
		Test 4	502	19	248	28	0.98	96.3532	89.8551	94.1029	0.869018	0.98
		Test 5	479	28	260	30	0.97	94.4773	89.6552	92.7227	0.842581	0.97
		Avg	530.6	22.4	216.2	27.8	0.97	95.891	88.7272	93.7014	0.850824	0.97
		SD	47.1837	5.45894	38.2387	10.2811	0.0122474	1.1909	3.52585	1.87031	0.037615	0.0122474
BACE1
	Model Number		TP	FN	TN	FP	ROC-AUC	SE	SP	ACC	MCC	ROC-AUC
[100,100]	21	Train 1	3399	153	1493	127	0.98	95.6926	92.1605	94.5862	0.874772	0.98
	22	Train 2	3510	101	1403	158	0.98	97.203	89.8783	94.9923	0.880241	0.98
0.4	23	Train 3	3506	107	1402	157	0.98	97.0385	89.9294	94.8956	0.877916	0.98
0.001	24	Train 4	3515	93	1395	169	0.98	97.4224	89.1944	94.9343	0.878805	0.98
100	25	Train 5	3518	123	1385	146	0.98	96.6218	90.4637	94.7989	0.874713	0.98
		Avg	3489.6	115.4	1415.6	151.4	0.98	96.7956	90.3253	94.8415	0.877289	0.98
		SD	50.8557	23.7234	43.8611	15.884	1.24127e-16	0.682772	1.12056	0.159087	0.00246845	1.24127e-16
		Validation 1	1117	68	484	55	0.97	94.2616	89.7959	92.8654	0.835212	0.97
		Validation 2	1165	48	444	67	0.97	96.0429	86.8885	93.3295	0.838632	0.97
		Validation 3	1169	56	427	72	0.96	95.4286	85.5711	92.5754	0.817979	0.96
		Validation 4	1144	51	450	79	0.97	95.7322	85.0662	92.4594	0.820696	0.97
		Validation 5	1174	47	437	66	0.97	96.1507	86.8787	93.4455	0.839925	0.97
		Avg	1153.8	54	448.4	67.8	0.968	95.5232	86.8401	92.935	0.830489	0.968
		SD	23.5308	8.57321	21.6633	8.81476	0.00447214	0.759618	1.83697	0.440606	0.0103688	0.00447214
		Test 1	1224	55	381	64	0.96	95.6998	85.618	93.0974	0.818652	0.96
		Test 2	1140	52	434	98	0.96	95.6376	81.5789	91.2993	0.792731	0.96
		Test 3	1129	49	488	58	0.97	95.8404	89.3773	93.7935	0.856025	0.97
		Test 4	1161	52	432	79	0.97	95.7131	84.5401	92.4014	0.815586	0.97
		Test 5	1086	68	495	75	0.97	94.1075	86.8421	91.7053	0.812053	0.97
		Avg	1148	55.2	446	74.8	0.966	95.3997	85.5913	92.4594	0.819009	0.966
		SD	50.5322	7.46324	46.7172	15.4499	0.00547723	0.726116	2.87676	1.01301	0.0230267	0.00547723
BCHE
	Model Number		TP	FN	TN	FP	ROC-AUC	SE	SP	ACC	MCC	ROC-AUC
[100,100]	21	Train 1	692	137	1272	26	0.97	83.4741	97.9969	92.3366	0.840233	0.97
	22	Train 2	737	111	1232	47	0.97	86.9104	96.3253	92.5717	0.844785	0.97
0.4	23	Train 3	674	156	1268	29	0.97	81.2048	97.7641	91.3023	0.818903	0.97
0.001	24	Train 4	762	98	1222	45	0.98	88.6047	96.4483	93.2769	0.860207	0.98
100	25	Train 5	759	106	1207	55	0.97	87.7457	95.6418	92.4307	0.842741	0.97
		Avg	724.8	121.6	1240.2	40.4	0.972	85.5879	96.8353	92.3836	0.841374	0.972
		SD	39.871	24.1516	28.6566	12.4016	0.00447214	3.12991	1.00576	0.708346	0.0147856	0.00447214
		Validation 1	205	85	402	17	0.94	70.6897	95.9427	85.6135	0.706399	0.94
		Validation 2	217	66	398	28	0.92	76.6784	93.4272	86.7419	0.721953	0.92
		Validation 3	194	68	423	24	0.94	74.0458	94.6309	87.024	0.718364	0.94
		Validation 4	209	50	412	38	0.93	80.695	91.5556	87.5882	0.730176	0.93
		Validation 5	224	50	390	45	0.94	81.7518	89.6552	86.6008	0.716569	0.94
		Avg	209.8	63.8	405	30.4	0.934	76.7721	93.0423	86.7137	0.718693	0.934
		SD	11.4761	14.6014	12.8062	11.149	0.00894427	4.59957	2.48833	0.721945	0.00863491	0.00894427
		Test 1	207	74	396	32	0.92	73.6655	92.5234	85.0494	0.684876	0.92
		Test 2	203	66	409	31	0.95	75.4647	92.9545	86.3188	0.706035	0.95
		Test 3	220	88	377	24	0.93	71.4286	94.015	84.2031	0.682799	0.93
		Test 4	215	66	404	24	0.93	76.5125	94.3925	87.3061	0.733675	0.93
		Test 5	218	43	411	37	0.94	83.5249	91.7411	88.7165	0.756415	0.94
		Avg	212.6	67.4	399.4	29.6	0.934	76.1192	93.1253	86.3188	0.71276	0.934
		SD	7.30068	16.334	13.7949	5.59464	0.0114018	4.56755	1.08454	1.78964	0.0318731	0.0114018
CASP1
	Model Number		TP	FN	TN	FP	ROC-AUC	SE	SP	ACC	MCC	ROC-AUC
[100,100]	21	Train 1	645	209	1808	77	0.96	75.5269	95.9151	89.5582	0.751133	0.96
	22	Train 2	640	189	1858	52	0.97	77.2014	97.2775	91.2012	0.787436	0.97
0.3	23	Train 3	606	197	1880	56	0.97	75.467	97.1074	90.7631	0.771697	0.97
0.001	24	Train 4	607	214	1865	53	0.97	73.9342	97.2367	90.2519	0.762429	0.97
100	25	Train 5	624	203	1863	49	0.97	75.4534	97.4372	90.7996	0.777313	0.97
		Avg	624.4	202.4	1854.8	57.4	0.968	75.5166	96.9948	90.5148	0.770002	0.968
		SD	18.0914	9.8387	27.4171	11.2383	0.00447214	1.15641	0.614935	0.63205	0.0139074	0.00447214
		Validation 1	187	75	614	37	0.89	71.374	94.3164	87.7327	0.690574	0.89
		Validation 2	190	99	591	33	0.89	65.7439	94.7115	85.5422	0.654485	0.89
		Validation 3	196	90	604	23	0.9	68.5315	96.3317	87.6232	0.704553	0.9
		Validation 4	181	76	627	29	0.91	70.428	95.5793	88.4995	0.70538	0.91
		Validation 5	164	84	632	33	0.91	66.129	95.0376	87.1851	0.661396	0.91
		Avg	183.6	84.8	613.6	31	0.9	68.4413	95.1953	87.3165	0.683277	0.9
		SD	12.2188	10.0349	16.7422	5.2915	0.01	2.50891	0.785847	1.09912	0.0239904	0.01
		Test 1	182	71	626	34	0.91	71.9368	94.8485	88.4995	0.703347	0.91
		Test 2	170	81	624	38	0.88	67.7291	94.2598	86.966	0.659863	0.88
		Test 3	183	97	593	40	0.9	65.3571	93.6809	84.9945	0.63363	0.9
		Test 4	202	89	598	24	0.91	69.4158	96.1415	87.6232	0.707832	0.91
		Test 5	191	103	584	35	0.87	64.966	94.3457	84.885	0.642136	0.87
		Avg	185.6	88.2	605	34.2	0.894	67.881	94.6553	86.5936	0.669361	0.894
		SD	11.8448	12.6965	18.9473	6.18061	0.0181659	2.90237	0.92841	1.60526	0.0344353	0.0181659
CASP3
	Model Number		TP	FN	TN	FP	ROC-AUC	SE	SP	ACC	MCC	ROC-AUC
[100,100]	21	Train 1	555	107	1114	27	0.98	83.8369	97.6337	92.5679	0.839949	0.98
	22	Train 2	577	119	1087	20	0.98	82.9023	98.1933	92.2906	0.838909	0.98
0.4	23	Train 3	638	97	1035	33	0.99	86.8027	96.9101	92.7898	0.851014	0.99
0.001	24	Train 4	631	90	1052	30	0.98	87.5173	97.2274	93.3444	0.861509	0.98
100	25	Train 5	602	114	1054	33	0.98	84.0782	96.9641	91.8469	0.830185	0.98
		Avg	600.6	105.4	1068.4	28.6	0.982	85.0275	97.3857	92.5679	0.844313	0.982
		SD	35.2179	11.929	31.6907	5.41295	0.00447214	2.01159	0.534488	0.558775	0.0121291	0.00447214
		Validation 1	192	58	337	14	0.94	76.8	96.0114	88.02	0.75612	0.94
		Validation 2	177	57	352	15	0.95	75.641	95.9128	88.02	0.748276	0.95
		Validation 3	191	48	344	18	0.94	79.9163	95.0276	89.0183	0.770147	0.94
		Validation 4	188	33	355	25	0.94	85.0679	93.4211	90.3494	0.791208	0.94
		Validation 5	184	50	352	15	0.95	78.6325	95.9128	89.1847	0.772363	0.95
		Avg	186.4	49.2	348	17.4	0.944	79.2115	95.2571	88.9185	0.767623	0.944
		SD	6.10737	10.0349	7.38241	4.50555	0.00547723	3.66377	1.10143	0.967351	0.0165207	0.00547723
		Test 1	208	57	330	6	0.95	78.4906	98.2143	89.5175	0.79534	0.95
		Test 2	195	52	328	26	0.93	78.9474	92.6554	87.0216	0.73062	0.93
		Test 3	152	51	378	20	0.95	74.8768	94.9749	88.1864	0.730927	0.95
		Test 4	194	41	349	17	0.95	82.5532	95.3552	90.3494	0.796499	0.95
		Test 5	186	41	357	17	0.96	81.9383	95.4545	90.3494	0.793341	0.96
		Avg	187	48.4	348.4	17.2	0.948	79.3613	95.3309	89.0849	0.769346	0.948
		SD	21.095	7.12741	20.647	7.25948	0.0109545	3.07689	1.97579	1.45341	0.0352295	0.0109545
CASP8
	Model Number		TP	FN	TN	FP	ROC-AUC	SE	SP	ACC	MCC	ROC-AUC
[100,100]	21	Train 1	180	23	663	10	0.97	88.67	98.5141	96.2329	0.892594	0.97
	22	Train 2	183	18	665	10	0.98	91.0448	98.5185	96.8037	0.908638	0.98
0.4	23	Train 3	175	28	665	8	0.98	86.2069	98.8113	95.8904	0.88242	0.98
0.001	24	Train 4	176	26	667	7	0.98	87.1287	98.9614	96.2329	0.892004	0.98
100	25	Train 5	159	24	682	11	0.98	86.8852	98.4127	96.0046	0.876807	0.98
		Avg	174.6	23.8	668.4	9.2	0.978	87.9871	98.6436	96.2329	0.890493	0.978
		SD	9.28978	3.76829	7.73305	1.64317	0.00447214	1.93234	0.231765	0.35185	0.0121288	0.00447214
		Validation 1	51	11	226	4	0.96	82.2581	98.2609	94.863	0.842175	0.96
		Validation 2	62	8	219	3	0.98	88.5714	98.6486	96.2329	0.895102	0.98
		Validation 3	54	8	226	4	0.97	87.0968	98.2609	95.8904	0.874944	0.97
		Validation 4	66	7	215	4	0.98	90.411	98.1735	96.2329	0.898495	0.98
		Validation 5	48	13	230	1	0.96	78.6885	99.5671	95.2055	0.851305	0.96
		Avg	56.2	9.4	223.2	3.2	0.97	85.4052	98.5822	95.6849	0.872404	0.97
		SD	7.56307	2.50998	6.05805	1.30384	0.01	4.82085	0.580511	0.62212	0.0253048	0.01
		Test 1	56	9	224	3	0.96	86.1538	98.6784	95.8904	0.878874	0.96
		Test 2	49	10	226	7	0.91	83.0508	96.9957	94.1781	0.816388	0.91
		Test 3	59	6	222	5	0.99	90.7692	97.7974	96.2329	0.890599	0.99
		Test 4	49	6	235	2	0.99	89.0909	99.1561	97.2603	0.908787	0.99
		Test 5	72	14	203	3	0.96	83.7209	98.5437	94.1781	0.858293	0.96
		Avg	57	9	222	4	0.962	86.5572	98.2343	95.5479	0.870588	0.962
		SD	9.46044	3.31662	11.726	2	0.0327109	3.3415	0.84672	1.34829	0.0354156	0.0327109
CHRM5
	Model Number		TP	FN	TN	FP	ROC-AUC	SE	SP	ACC	MCC	ROC-AUC
[100,100]	21	Train 1	377	20	644	15	0.99	94.9622	97.7238	96.6856	0.929234	0.99
	22	Train 2	343	46	656	11	0.99	88.1748	98.3508	94.6023	0.884122	0.99
0.4	23	Train 3	353	49	641	13	0.99	87.8109	98.0122	94.1288	0.875672	0.99
0.001	24	Train 4	400	28	616	12	0.99	93.4579	98.0892	96.2121	0.921414	0.99
100	25	Train 5	381	25	638	12	0.99	93.8424	98.1538	96.4962	0.925841	0.99
		Avg	370.8	33.6	639	12.6	0.99	91.6497	98.066	95.625	0.907257	0.99
		SD	22.8298	13.0499	14.5602	1.51658	0	3.38605	0.228776	1.17401	0.0253063	0
		Validation 1	124	18	194	16	0.95	87.3239	92.381	90.3409	0.798927	0.95
		Validation 2	100	36	211	5	0.96	73.5294	97.6852	88.3523	0.757918	0.96
		Validation 3	122	26	198	6	0.97	82.4324	97.0588	90.9091	0.815711	0.97
		Validation 4	111	22	208	11	0.95	83.4586	94.9772	90.625	0.799132	0.95
		Validation 5	116	19	209	8	0.95	85.9259	96.3134	92.3295	0.83714	0.95
		Avg	114.6	24.2	204	9.2	0.956	82.5341	95.6831	90.5114	0.801765	0.956
		SD	9.63328	7.29383	7.51665	4.43847	0.00894427	5.39436	2.10361	1.42895	0.0290835	0.00894427
		Test 1	124	16	190	22	0.96	88.5714	89.6226	89.2045	0.776776	0.96
		Test 2	123	31	191	7	0.96	79.8701	96.4646	89.2045	0.784634	0.96
		Test 3	110	19	216	7	0.97	85.2713	96.861	92.6136	0.840107	0.97
		Test 4	97	21	227	7	0.96	82.2034	97.0085	92.0455	0.819591	0.96
		Test 5	115	23	192	22	0.93	83.3333	89.7196	87.2159	0.731484	0.93
		Avg	113.8	22	203.2	13	0.956	83.8499	93.9353	90.0568	0.790518	0.956
		SD	11.0318	5.65685	17.1668	8.21584	0.0151658	3.28366	3.89785	2.23693	0.0418711	0.0151658
CHUK
	Model Number		TP	FN	TN	FP	ROC-AUC	SE	SP	ACC	MCC	ROC-AUC
[100,100]	21	Train 1	140	42	647	2	0.99	76.9231	99.6918	94.7052	0.841817	0.99
	22	Train 2	121	57	650	3	0.99	67.9775	99.5406	92.7798	0.777439	0.99
0.4	23	Train 3	165	21	642	3	0.99	88.7097	99.5349	97.1119	0.915826	0.99
0.001	24	Train 4	179	17	626	9	0.99	91.3265	98.5827	96.8712	0.912294	0.99
100	25	Train 5	184	11	628	8	1	94.359	98.7421	97.7136	0.936051	1
		Avg	157.8	29.6	638.6	5	0.992	83.8592	99.2184	95.8363	0.876685	0.992
		SD	26.7339	19.2562	10.9909	3.24037	0.00447214	11.0665	0.514556	2.05209	0.0659354	0.00447214
		Validation 1	46	18	211	2	0.99	71.875	99.061	92.7798	0.789966	0.99
		Validation 2	39	22	214	2	0.99	63.9344	99.0741	91.3357	0.735263	0.99
		Validation 3	46	22	208	1	0.98	67.6471	99.5215	91.6968	0.77016	0.98
		Validation 4	57	17	201	2	0.99	77.027	99.0148	93.1408	0.821792	0.99
		Validation 5	55	5	213	4	0.98	91.6667	98.1567	96.7509	0.903734	0.98
		Avg	48.6	16.8	209.4	2.2	0.986	74.43	98.9656	93.1408	0.804183	0.986
		SD	7.36885	6.97854	5.22494	1.09545	0.00547723	10.7998	0.496664	2.15097	0.0638945	0.00547723
		Test 1	57	13	205	2	0.99	81.4286	99.0338	94.5848	0.854029	0.99
		Test 2	38	39	199	1	0.98	49.3506	99.5	85.5596	0.629231	0.98
		Test 3	179	17	626	9	0.98	91.3265	98.5827	96.8712	0.912294	0.98
		Test 4	30	16	231	0	0.98	65.2174	100	94.2238	0.780979	0.98
		Test 5	45	16	213	3	0.97	73.7705	98.6111	93.1408	0.792468	0.97
		Avg	69.8	20.2	294.8	3	0.98	72.2187	99.1455	92.8761	0.7938	0.98
		SD	61.8442	10.616	185.538	3.53553	0.00707107	16.0024	0.606353	4.30984	0.105969	0.00707107
CSF1R
	Model Number		TP	FN	TN	FP	ROC-AUC	SE	SP	ACC	MCC	ROC-AUC
[100,100]	21	Train 1	771	21	635	4	1	97.3485	99.374	98.253	0.965023	1
	22	Train 2	790	16	606	19	0.99	98.0149	96.96	97.5542	0.95027	0.99
0.4	23	Train 3	783	23	614	11	1	97.1464	98.24	97.624	0.95195	1
0.001	24	Train 4	792	12	609	18	1	98.5075	97.1292	97.9036	0.95741	1
100	25	Train 5	792	24	611	4	1	97.0588	99.3496	98.0433	0.960626	1
		Avg	785.6	19.2	615	11.2	0.998	97.6152	98.2106	97.8756	0.957056	0.998
		SD	8.96103	5.06952	11.5542	7.25948	0.00447214	0.623768	1.1603	0.290659	0.00609248	0.00447214
		Validation 1	251	18	198	10	0.98	93.3086	95.1923	94.13	0.881674	0.98
		Validation 2	248	13	204	12	0.99	95.0192	94.4444	94.7589	0.894287	0.99
		Validation 3	252	9	199	17	0.99	96.5517	92.1296	94.5493	0.890167	0.99
		Validation 4	254	7	200	16	0.99	97.318	92.5926	95.1782	0.903007	0.99
		Validation 5	252	16	195	14	0.99	94.0299	93.3014	93.7107	0.872425	0.99
		Avg	251.4	12.6	199.2	13.8	0.988	95.2455	93.5321	94.4654	0.888312	0.988
		SD	2.19089	4.61519	3.27109	2.86356	0.00447214	1.67946	1.27392	0.566426	0.0117422	0.00447214
		Test 1	264	11	189	13	0.99	96	93.5644	94.9686	0.896855	0.99
		Test 2	264	5	198	10	1	98.1413	95.1923	96.8553	0.9361	1
		Test 3	254	15	202	6	0.99	94.4238	97.1154	95.5975	0.911587	0.99
		Test 4	254	17	191	15	0.98	93.7269	92.7184	93.2914	0.86348	0.98
		Test 5	240	12	217	8	0.99	95.2381	96.4444	95.8071	0.916082	0.99
		Avg	255.2	12	199.4	10.4	0.99	95.506	95.007	95.304	0.904821	0.99
		SD	9.85901	4.58258	11.149	3.64692	0.00707107	1.70269	1.86176	1.31425	0.0270349	0.00707107
CSNK1D
	Model Number		TP	FN	TN	FP	ROC-AUC	SE	SP	ACC	MCC	ROC-AUC
[100,100]	21	Train 1	396	30	607	8	0.99	92.9577	98.6992	96.3497	0.924799	0.99
	22	Train 2	408	19	603	11	0.99	95.5504	98.2085	97.1182	0.94039	0.99
0.4	23	Train 3	400	25	613	3	0.99	94.1176	99.513	97.3103	0.9448	0.99
0.001	24	Train 4	397	22	612	10	0.99	94.7494	98.3923	96.926	0.936062	0.99
100	25	Train 5	419	17	601	4	0.99	96.1009	99.3388	97.9827	0.958707	0.99
		Avg	404	22.6	607.2	7.2	0.99	94.6952	98.8304	97.1374	0.940952	0.99
		SD	9.61769	5.12835	5.31037	3.56371	0	1.23111	0.574543	0.593719	0.0124016	0
		Validation 1	125	10	202	10	0.98	92.5926	95.283	94.2363	0.878756	0.98
		Validation 2	132	17	187	11	0.97	88.5906	94.4444	91.9308	0.835034	0.97
		Validation 3	118	20	201	8	0.98	85.5072	96.1722	91.9308	0.831274	0.98
		Validation 4	139	11	183	14	0.97	92.6667	92.8934	92.7954	0.853696	0.97
		Validation 5	105	22	208	12	0.97	82.6772	94.5455	90.2017	0.786866	0.97
		Avg	123.8	16	196.2	11	0.974	88.4069	94.6677	92.219	0.837125	0.974
		SD	13.1034	5.33854	10.663	2.23607	0.00547723	4.38569	1.20988	1.46946	0.0338094	0.00547723
		Test 1	125	22	196	4	0.98	85.034	98	92.5072	0.848998	0.98
		Test 2	124	8	204	11	0.98	93.9394	94.8837	94.5245	0.884499	0.98
		Test 3	125	20	188	14	0.96	86.2069	93.0693	90.2017	0.797928	0.96
		Test 4	130	9	202	6	0.99	93.5252	97.1154	95.6772	0.909811	0.99
		Test 5	122	23	193	9	0.96	84.1379	95.5446	90.7781	0.8107	0.96
		Avg	125.2	16.4	196.6	8.8	0.974	88.5687	95.7226	92.7378	0.850387	0.974
		SD	2.94958	7.30068	6.54217	3.96232	0.0134164	4.77271	1.93014	2.3536	0.0474968	0.0134164
EDNRB
	Model Number		TP	FN	TN	FP	ROC-AUC	SE	SP	ACC	MCC	ROC-AUC
[100,100]	21	Train 1	430	17	748	32	0.99	96.1969	95.8974	96.0065	0.914707	0.99
	22	Train 2	456	42	717	12	1	91.5663	98.3539	95.599	0.909058	1
0.4	23	Train 3	490	22	705	10	1	95.7031	98.6014	97.392	0.946386	1
0.001	24	Train 4	451	32	730	14	1	93.3747	98.1183	96.251	0.921391	1
100	25	Train 5	484	24	699	20	1	95.2756	97.2184	96.414	0.92603	1
		Avg	462.2	27.4	719.8	17.6	0.998	94.4233	97.6379	96.3325	0.923515	0.998
		SD	24.7427	9.78775	19.7408	8.87694	0.00447214	1.92172	1.1042	0.667103	0.0143221	0.00447214
		Validation 1	136	8	252	13	0.99	94.4444	95.0943	94.8655	0.88866	0.99
		Validation 2	137	15	251	6	0.99	90.1316	97.6654	94.8655	0.889731	0.99
		Validation 3	139	13	252	5	0.99	91.4474	98.0545	95.599	0.905558	0.99
		Validation 4	140	19	241	9	0.99	88.0503	96.4	93.154	0.855441	0.99
		Validation 5	172	9	220	8	0.99	95.0276	96.4912	95.8435	0.915721	0.99
		Avg	144.8	12.8	243.2	8.2	0.99	91.8203	96.7411	94.8655	0.891022	0.99
		SD	15.2872	4.49444	13.7732	3.11448	0	2.93158	1.16938	1.05163	0.0228834	0
		Test 1	182	36	179	12	0.98	83.4862	93.7173	88.2641	0.771369	0.98
		Test 2	141	18	247	3	0.99	88.6792	98.8	94.8655	0.892831	0.99
		Test 3	116	29	254	10	0.98	80	96.2121	90.4645	0.789644	0.98
		Test 4	136	31	239	3	0.99	81.4371	98.7603	91.687	0.832218	0.99
		Test 5	112	8	273	16	0.98	93.3333	94.4637	94.132	0.862107	0.98
		Avg	137.4	24.4	238.4	8.8	0.984	85.3872	96.3907	91.8826	0.829634	0.984
		SD	27.8711	11.2827	35.5077	5.71839	0.00547723	5.5276	2.3618	2.69725	0.0501226	0.00547723
ELANE
	Model Number		TP	FN	TN	FP	ROC-AUC	SE	SP	ACC	MCC	ROC-AUC
[100,100]	21	Train 1	1187	50	816	50	0.99	95.958	94.2263	95.2449	0.901843	0.99
	22	Train 2	1218	66	790	29	0.99	94.8598	96.4591	95.4826	0.90639	0.99
0.4	23	Train 3	1199	59	798	47	0.99	95.31	94.4379	94.9596	0.895454	0.99
0.001	24	Train 4	1275	57	729	42	0.99	95.7207	94.5525	95.2924	0.899154	0.99
100	25	Train 5	1200	82	782	39	0.99	93.6037	95.2497	94.2463	0.881043	0.99
		Avg	1215.8	62.8	783	41.4	0.99	95.0905	94.9851	95.0452	0.896777	0.99
		SD	34.8956	12.1532	32.7109	8.14248	0	0.930258	0.908982	0.484228	0.00965684	0
		Validation 1	389	27	259	26	0.98	93.5096	90.8772	92.4394	0.843406	0.98
		Validation 2	376	33	277	15	0.97	91.9315	94.863	93.1526	0.861542	0.97
		Validation 3	410	24	232	35	0.98	94.47	86.8914	91.5835	0.820577	0.98
		Validation 4	398	35	245	23	0.98	91.9169	91.4179	91.7261	0.826832	0.98
		Validation 5	424	27	228	22	0.98	94.0133	91.2	93.01	0.848454	0.98
		Avg	399.4	29.2	248.2	24.2	0.978	93.1683	91.0499	92.3823	0.840162	0.978
		SD	18.5418	4.60435	20.1668	7.25948	0.00447214	1.18541	2.82935	0.717534	0.0165653	0.00447214
		Test 1	449	32	200	20	0.97	93.3472	90.9091	92.582	0.830913	0.97
		Test 2	414	27	235	25	0.98	93.8776	90.3846	92.582	0.841309	0.98
		Test 3	421	21	228	31	0.98	95.2489	88.0309	92.582	0.839908	0.98
		Test 4	315	54	310	22	0.96	85.3659	93.3735	89.1583	0.78688	0.96
		Test 5	360	41	278	22	0.97	89.7756	92.6667	91.0128	0.819135	0.97
		Avg	391.8	35	250.2	24	0.972	91.523	91.073	91.5835	0.823629	0.972
		SD	53.6815	12.9035	43.5683	4.30116	0.0083666	3.99117	2.09686	1.51643	0.0223682	0.0083666
EPHA2
	Model Number		TP	FN	TN	FP	ROC-AUC	SE	SP	ACC	MCC	ROC-AUC
[100,100]	21	Train 1	255	25	695	3	0.99	91.0714	99.5702	97.137	0.929733	0.99
	22	Train 2	283	28	667	0	1	90.9968	100	97.137	0.934509	1
0.4	23	Train 3	292	34	652	0	1	89.5706	100	96.5235	0.922666	1
0.001	24	Train 4	281	30	667	0	0.99	90.3537	100	96.9325	0.929864	0.99
100	25	Train 5	312	30	634	2	1	91.2281	99.6855	96.728	0.928585	1
		Avg	284.6	29.4	663	1	0.996	90.6441	99.8511	96.8916	0.929071	0.996
		SD	20.5985	3.28634	22.4611	1.41421	0.00547723	0.68645	0.207864	0.266634	0.00423984	0.00547723
		Validation 1	67	14	245	0	0.99	82.716	100	95.7055	0.884562	0.99
		Validation 2	95	22	208	1	0.98	81.1966	99.5215	92.9448	0.849449	0.98
		Validation 3	102	22	201	1	0.97	82.2581	99.505	92.9448	0.853832	0.97
		Validation 4	99	11	216	0	0.99	90	100	96.6258	0.925412	0.99
		Validation 5	98	12	215	1	0.99	89.0909	99.537	96.0123	0.911304	0.99
		Avg	92.2	16.2	217	0.6	0.984	85.0523	99.7127	94.8466	0.884912	0.984
		SD	14.3073	5.4037	16.778	0.547723	0.00894427	4.15098	0.26251	1.76747	0.0337657	0.00894427
		Test 1	157	10	158	1	0.99	94.012	99.3711	96.6258	0.933989	0.99
		Test 2	85	15	226	0	0.98	85	100	95.3988	0.892802	0.98
		Test 3	56	22	248	0	0.99	71.7949	100	93.2515	0.812065	0.99
		Test 4	88	19	219	0	0.98	82.243	100	94.1718	0.869927	0.98
		Test 5	61	15	249	1	0.98	80.2632	99.6	95.092	0.86045	0.98
		Avg	89.4	16.2	220	0.4	0.984	82.6626	99.7942	94.908	0.873847	0.984
		SD	40.3522	4.54973	37.1012	0.547723	0.00547723	8.03605	0.293178	1.27587	0.0446884	0.00547723
FGFR1
	Model Number		TP	FN	TN	FP	ROC-AUC	SE	SP	ACC	MCC	ROC-AUC
[100,100]	21	Train 1	1178	41	762	41	0.99	96.6366	94.8941	95.9446	0.915307	0.99
	22	Train 2	1291	36	651	44	0.99	97.2871	93.6691	96.0435	0.912097	0.99
0.4	23	Train 3	1305	22	629	66	0.99	98.3421	90.5036	95.6479	0.90314	0.99
0.001	24	Train 4	1286	40	664	32	0.99	96.9834	95.4023	96.4392	0.921377	0.99
100	25	Train 5	1292	40	648	42	0.99	96.997	93.913	95.9446	0.909738	0.99
		Avg	1270.4	35.8	670.8	45	0.99	97.2492	93.6764	96.004	0.912332	0.99
		SD	52.1277	7.94984	52.4948	12.6095	0	0.652968	1.90947	0.284963	0.00674405	0
		Validation 1	378	30	246	20	0.98	92.6471	92.4812	92.5816	0.846152	0.98
		Validation 2	400	14	224	36	0.98	96.6184	86.1538	92.5816	0.843023	0.98
		Validation 3	401	17	231	25	0.98	95.933	90.2344	93.7685	0.867202	0.98
		Validation 4	418	15	223	18	0.99	96.5358	92.5311	95.1039	0.893176	0.99
		Validation 5	431	17	198	28	0.97	96.2054	87.6106	93.3234	0.848974	0.97
		Avg	405.6	18.6	224.4	25.4	0.98	95.5879	89.8022	93.4718	0.859706	0.98
		SD	20.0823	6.50385	17.3868	7.12741	0.00707107	1.66653	2.86899	1.04386	0.0209382	0.00707107
		Test 1	530	6	124	14	0.99	98.8806	89.8551	97.0326	0.907505	0.99
		Test 2	405	17	218	34	0.97	95.9716	86.5079	92.4332	0.837406	0.97
		Test 3	401	17	225	31	0.98	95.933	87.8906	92.8783	0.848057	0.98
		Test 4	367	37	243	27	0.96	90.8416	90	90.5045	0.80386	0.96
		Test 5	371	12	268	23	0.98	96.8668	92.0962	94.8071	0.894187	0.98
		Avg	414.8	17.8	215.6	25.8	0.976	95.6987	89.27	93.5312	0.858203	0.976
		SD	66.6348	11.649	54.7293	7.79102	0.0114018	2.9669	2.14443	2.484	0.0424682	0.0114018
FKBP1A
	Model Number		TP	FN	TN	FP	ROC-AUC	SE	SP	ACC	MCC	ROC-AUC
[100,100]	21	Train 1	178	17	616	5	0.99	91.2821	99.1948	97.3039	0.925067	0.99
	22	Train 2	189	1	607	19	1	99.4737	96.9649	97.549	0.935257	1
0.4	23	Train 3	219	4	582	11	1	98.2063	98.145	98.1618	0.954387	1
0.001	24	Train 4	203	17	589	7	0.99	92.2727	98.8255	97.0588	0.924695	0.99
100	25	Train 5	203	17	587	9	0.99	92.2727	98.4899	96.8137	0.91845	0.99
		Avg	198.4	11.2	596.2	10.2	0.994	94.7015	98.324	97.3775	0.931571	0.994
		SD	15.582	8.01249	14.5499	5.4037	0.00547723	3.82582	0.85392	0.517035	0.0141061	0.00547723
		Validation 1	60	15	197	0	0.99	80	100	94.4853	0.862204	0.99
		Validation 2	59	4	196	13	0.99	93.6508	93.7799	93.75	0.836038	0.99
		Validation 3	75	2	190	5	1	97.4026	97.4359	97.4265	0.937674	1
		Validation 4	64	9	195	4	0.99	87.6712	97.9899	95.2206	0.876602	0.99
		Validation 5	71	9	188	4	0.99	88.75	97.9167	95.2206	0.883657	0.99
		Avg	65.8	7.8	193.2	5.2	0.992	89.4949	97.4245	95.2206	0.879235	0.992
		SD	6.97854	5.06952	3.96232	4.76445	0.00447214	6.59236	2.26265	1.37561	0.0374085	0.00447214
		Test 1	77	7	184	4	0.99	91.6667	97.8723	95.9559	0.904631	0.99
		Test 2	98	3	165	6	0.99	97.0297	96.4912	96.6912	0.929814	0.99
		Test 3	53	1	193	25	0.97	98.1481	88.5321	90.4412	0.764535	0.97
		Test 4	56	5	209	2	1	91.8033	99.0521	97.4265	0.925201	1
		Test 5	49	5	214	4	1	90.7407	98.1651	96.6912	0.895356	1
		Avg	66.6	4.2	193	8.2	0.99	93.8777	96.0226	95.4412	0.883907	0.99
		SD	20.6228	2.28035	19.7611	9.49737	0.0122474	3.43527	4.28711	2.84303	0.0682331	0.0122474
FLT1
	Model Number		TP	FN	TN	FP	ROC-AUC	SE	SP	ACC	MCC	ROC-AUC
[100,100]	21	Train 1	621	36	1233	9	0.99	94.5205	99.2754	97.6303	0.947603	0.99
	22	Train 2	600	23	1257	19	0.99	96.3082	98.511	97.7883	0.949763	0.99
0.4	23	Train 3	635	23	1221	20	0.99	96.5046	98.3884	97.7357	0.949953	0.99
0.001	24	Train 4	627	34	1229	9	0.99	94.8563	99.273	97.7357	0.95007	0.99
100	25	Train 5	633	26	1227	13	1	96.0546	98.9516	97.9463	0.954583	1
		Avg	623.2	28.4	1233.4	14	0.992	95.6488	98.8799	97.7672	0.950394	0.992
		SD	14.0784	6.1887	13.8852	5.2915	0.00447214	0.899007	0.416462	0.115371	0.0025515	0.00447214
		Validation 1	207	18	397	11	0.98	92	97.3039	95.4186	0.89958	0.98
		Validation 2	206	13	401	13	0.98	94.0639	96.8599	95.8926	0.909238	0.98
		Validation 3	189	17	418	9	0.98	91.7476	97.8923	95.8926	0.905882	0.98
		Validation 4	200	23	405	5	0.99	89.6861	98.7805	95.5766	0.903077	0.99
		Validation 5	200	21	405	7	0.99	90.4977	98.301	95.5766	0.902322	0.99
		Avg	200.4	18.4	405.2	9	0.984	91.5991	97.8275	95.6714	0.90402	0.984
		SD	7.1624	3.84708	7.8867	3.16228	0.00547723	1.66814	0.765985	0.21195	0.00368059	0.00547723
		Test 1	194	12	418	9	0.99	94.1748	97.8923	96.6825	0.924207	0.99
		Test 2	227	19	376	11	0.98	92.2764	97.1576	95.2607	0.899992	0.98
		Test 3	205	19	395	14	0.98	91.5179	96.577	94.7867	0.885552	0.98
		Test 4	178	26	424	5	0.99	87.2549	98.8345	95.1027	0.887486	0.99
		Test 5	189	19	419	6	0.98	90.8654	98.5882	96.0506	0.910059	0.98
		Avg	198.6	19	406.4	9	0.984	91.2179	97.8099	95.5766	0.901459	0.984
		SD	18.6091	4.94975	20.3544	3.67423	0.00547723	2.53885	0.949718	0.77393	0.016139	0.00547723
FLT4
	Model Number		TP	FN	TN	FP	ROC-AUC	SE	SP	ACC	MCC	ROC-AUC
[100,100]	21	Train 1	369	27	656	1	1	93.1818	99.8478	97.3409	0.943931	1
	22	Train 2	389	18	638	8	0.99	95.5774	98.7616	97.5309	0.947889	0.99
0.4	23	Train 3	381	15	652	5	0.99	96.2121	99.239	98.1007	0.959521	0.99
0.001	24	Train 4	395	18	631	9	0.99	95.6416	98.5938	97.4359	0.946163	0.99
100	25	Train 5	406	22	618	7	0.99	94.8598	98.88	97.246	0.94302	0.99
		Avg	388	20	639	6	0.992	95.0946	99.0644	97.5309	0.948105	0.992
		SD	14	4.63681	15.5242	3.16228	0.00447214	1.17208	0.497839	0.335758	0.00666005	0.00447214
		Validation 1	100	27	220	4	0.96	78.7402	98.2143	91.1681	0.809831	0.96
		Validation 2	133	11	203	4	0.99	92.3611	98.0676	95.7265	0.911813	0.99
		Validation 3	135	9	201	6	0.99	93.75	97.1014	95.7265	0.911547	0.99
		Validation 4	117	10	222	2	0.98	92.126	99.1071	96.5812	0.926107	0.98
		Validation 5	108	6	231	6	0.98	94.7368	97.4684	96.5812	0.922052	0.98
		Avg	118.6	12.6	215.4	4.4	0.98	90.3428	97.9918	95.1567	0.89627	0.98
		SD	15.3069	8.26438	12.9345	1.67332	0.0122474	6.5725	0.769084	2.27028	0.0487381	0.0122474
		Test 1	129	22	196	4	0.98	85.4305	98	92.5926	0.851479	0.98
		Test 2	115	8	217	11	0.99	93.4959	95.1754	94.5869	0.881915	0.99
		Test 3	116	18	212	5	0.96	86.5672	97.6959	93.4473	0.861316	0.96
		Test 4	123	11	204	13	0.98	91.791	94.0092	93.1624	0.855622	0.98
		Test 5	119	13	216	3	0.98	90.1515	98.6301	95.4416	0.903097	0.98
		Avg	120.4	14.4	209	7.2	0.978	89.4872	96.7021	93.8462	0.870686	0.978
		SD	5.72713	5.59464	8.88819	4.49444	0.0109545	3.42062	1.99823	1.15024	0.021565	0.0109545
FYN
	Model Number		TP	FN	TN	FP	ROC-AUC	SE	SP	ACC	MCC	ROC-AUC
[100,100]	21	Train 1	172	54	668	3	0.97	76.1062	99.5529	93.6455	0.828875	0.97
	22	Train 2	210	46	638	3	0.98	82.0312	99.532	94.5373	0.865617	0.98
0.2	23	Train 3	192	51	649	5	0.98	79.0123	99.2355	93.757	0.840005	0.98
0.001	24	Train 4	219	32	641	5	0.98	87.251	99.226	95.8751	0.896855	0.98
100	25	Train 5	205	51	639	2	0.99	80.0781	99.688	94.0914	0.854983	0.99
		Avg	199.6	46.8	647	3.6	0.98	80.8958	99.4469	94.3813	0.857267	0.98
		SD	18.2565	8.75785	12.51	1.34164	0.00707107	4.14832	0.206212	0.904317	0.0262021	0.00707107
		Validation 1	52	41	202	4	0.93	55.914	98.0583	84.9498	0.640396	0.93
		Validation 2	62	29	204	4	0.94	68.1319	98.0769	88.9632	0.734544	0.94
		Validation 3	54	34	209	2	0.93	61.3636	99.0521	87.9599	0.705725	0.93
		Validation 4	47	32	210	10	0.93	59.4937	95.4545	85.9532	0.616784	0.93
		Validation 5	66	31	196	6	0.92	68.0412	97.0297	87.6254	0.712475	0.92
		Avg	56.2	33.4	204.2	5.2	0.93	62.5889	97.5343	87.0903	0.681985	0.93
		SD	7.69415	4.61519	5.6745	3.03315	0.00707107	5.38722	1.36499	1.61438	0.0505879	0.00707107
		Test 1	61	40	194	4	0.93	60.396	97.9798	85.2843	0.669363	0.93
		Test 2	44	29	214	12	0.92	60.274	94.6903	86.2876	0.6052	0.92
		Test 3	45	44	207	3	0.95	50.5618	98.5714	84.2809	0.611959	0.95
		Test 4	48	42	206	3	0.9	53.3333	98.5646	84.9498	0.632898	0.9
		Test 5	45	22	223	9	0.92	67.1642	96.1207	89.6321	0.685964	0.92
		Avg	48.6	35.4	208.8	6.2	0.924	58.3459	97.1854	86.087	0.641077	0.924
		SD	7.09225	9.47629	10.7098	4.08656	0.0181659	6.546	1.71855	2.10994	0.035415	0.0181659
GSK3B
	Model Number		TP	FN	TN	FP	ROC-AUC	SE	SP	ACC	MCC	ROC-AUC
[100,100]	21	Train 1	1459	67	691	66	0.98	95.6094	91.2814	94.1743	0.868619	0.98
	22	Train 2	1489	49	658	87	0.98	96.814	88.3221	94.0429	0.863342	0.98
0.4	23	Train 3	1498	33	667	85	0.98	97.8445	88.6968	94.8314	0.882126	0.98
0.001	24	Train 4	1483	47	637	116	0.98	96.9281	84.595	92.8603	0.836703	0.98
100	25	Train 5	1475	27	717	64	0.99	98.2024	91.8054	96.014	0.911034	0.99
		Avg	1480.8	44.6	674	83.6	0.982	97.0797	88.9401	94.3846	0.872365	0.982
		SD	14.8054	15.582	30.8707	20.9595	0.00447214	1.01251	2.87284	1.15533	0.0271929	0.00447214
		Validation 1	458	42	218	43	0.95	91.6	83.5249	88.8305	0.751941	0.95
		Validation 2	498	22	195	46	0.96	95.7692	80.9129	91.0644	0.790087	0.96
		Validation 3	502	22	190	47	0.96	95.8015	80.1688	90.933	0.784747	0.96
		Validation 4	485	32	191	53	0.94	93.8104	78.2787	88.8305	0.739208	0.94
		Validation 5	483	25	196	57	0.94	95.0787	77.4704	89.2247	0.752889	0.94
		Avg	485.2	28.6	198	49.2	0.95	94.412	80.0711	89.7766	0.763774	0.95
		SD	17.254	8.53229	11.4673	5.6745	0.01	1.76682	2.37821	1.1281	0.0223284	0.01
		Test 1	485	38	211	27	0.96	92.7342	88.6555	91.4586	0.804218	0.96
		Test 2	470	21	211	59	0.95	95.723	78.1481	89.4875	0.76776	0.95
		Test 3	464	30	201	66	0.94	93.9271	75.2809	87.385	0.718343	0.94
		Test 4	475	27	209	50	0.95	94.6215	80.695	89.8817	0.771536	0.95
		Test 5	522	17	170	52	0.95	96.846	76.5766	90.933	0.775218	0.95
		Avg	483.2	26.6	200.4	50.8	0.95	94.7704	79.8712	89.8292	0.767415	0.95
		SD	23.0152	8.14248	17.4871	14.7207	0.00707107	1.58863	5.30887	1.57851	0.0309862	0.00707107
HDAC3
	Model Number		TP	FN	TN	FP	ROC-AUC	SE	SP	ACC	MCC	ROC-AUC
[100,100]	21	Train 1	602	18	659	35	0.99	97.0968	94.9568	95.9665	0.919501	0.99
	22	Train 2	614	21	648	31	0.99	96.6929	95.4345	96.0426	0.920911	0.99
0.4	23	Train 3	598	18	665	33	0.99	97.0779	95.2722	96.1187	0.922424	0.99
0.001	24	Train 4	627	12	635	40	0.99	98.1221	94.0741	96.0426	0.921722	0.99
100	25	Train 5	615	18	648	33	0.99	97.1564	95.1542	96.1187	0.922576	0.99
		Avg	611.2	17.4	651	34.4	0.99	97.2292	94.9783	96.0578	0.921427	0.99
		SD	11.5195	3.28634	11.5542	3.43511	0	0.531633	0.53467	0.0636728	0.00126283	0
		Validation 1	209	10	211	8	0.99	95.4338	96.347	95.8904	0.917846	0.99
		Validation 2	198	9	215	16	0.97	95.6522	93.0736	94.2922	0.886156	0.97
		Validation 3	194	14	211	19	0.98	93.2692	91.7391	92.4658	0.849329	0.98
		Validation 4	212	13	198	15	0.97	94.2222	92.9577	93.6073	0.872054	0.97
		Validation 5	190	12	225	11	0.98	94.0594	95.339	94.7489	0.894312	0.98
		Avg	200.6	11.6	212	13.8	0.978	94.5274	93.8913	94.2009	0.88394	0.978
		SD	9.5289	2.07364	9.69536	4.32435	0.0083666	0.997723	1.89066	1.27732	0.0255015	0.0083666
		Test 1	204	8	205	21	0.97	96.2264	90.708	93.379	0.869226	0.97
		Test 2	192	17	211	18	0.96	91.866	92.1397	92.0091	0.839891	0.96
		Test 3	217	10	199	12	0.98	95.5947	94.3128	94.9772	0.899413	0.98
		Test 4	174	13	234	17	0.97	93.0481	93.2271	93.1507	0.860555	0.97
		Test 5	207	9	213	9	0.98	95.8333	95.9459	95.8904	0.917793	0.98
		Avg	198.8	11.4	212.4	15.4	0.972	94.5137	93.2667	93.8813	0.877376	0.972
		SD	16.4833	3.64692	13.259	4.82701	0.0083666	1.93659	2.00571	1.54342	0.0311193	0.0083666
IGF1R
	Model Number		TP	FN	TN	FP	ROC-AUC	SE	SP	ACC	MCC	ROC-AUC
[100,100]	21	Train 1	1363	52	738	16	1	96.3251	97.878	96.8649	0.932252	1
	22	Train 2	1474	34	634	27	0.99	97.7454	95.9153	97.1876	0.933856	0.99
0.4	23	Train 3	1443	30	656	40	0.99	97.9633	94.2529	96.7727	0.925722	0.99
0.001	24	Train 4	1493	29	620	27	1	98.0946	95.8269	97.4182	0.938384	1
100	25	Train 5	1502	30	605	32	0.99	98.0418	94.9765	97.1415	0.931038	0.99
		Avg	1455	35	650.6	28.4	0.994	97.634	95.7699	97.077	0.93225	0.994
		SD	56.1738	9.69536	52.3431	8.73499	0.00547723	0.743734	1.36009	0.259988	0.00459022	0.00547723
		Validation 1	458	22	231	12	0.98	95.4167	95.0617	95.2974	0.896106	0.98
		Validation 2	485	17	200	21	0.99	96.6135	90.4977	94.7441	0.875623	0.99
		Validation 3	474	13	207	29	0.99	97.3306	87.7119	94.1909	0.866684	0.99
		Validation 4	490	15	193	25	0.99	97.0297	88.5321	94.4675	0.867398	0.99
		Validation 5	484	24	198	17	0.99	95.2756	92.093	94.3292	0.865787	0.99
		Avg	478.2	18.2	205.8	20.8	0.988	96.3332	90.7793	94.6058	0.87432	0.988
		SD	12.6965	4.65833	14.9566	6.64831	0.00447214	0.937694	2.94123	0.437383	0.0127999	0.00447214
		Test 1	580	22	231	12	0.99	96.3455	95.0617	95.9763	0.90336	0.99
		Test 2	452	21	237	13	0.99	95.5603	94.8	95.2974	0.897102	0.99
		Test 3	509	14	185	15	0.99	97.3231	92.5	95.9889	0.899626	0.99
		Test 4	433	23	240	27	0.98	94.9561	89.8876	93.0844	0.851141	0.98
		Test 5	415	28	251	29	0.97	93.6795	89.6429	92.1162	0.833775	0.97
		Avg	477.8	21.6	228.8	19.2	0.984	95.5729	92.3784	94.4926	0.877001	0.984
		SD	67.1469	5.02991	25.5382	8.13634	0.00894427	1.38075	2.58681	1.78316	0.0322025	0.00894427
INSR
	Model Number		TP	FN	TN	FP	ROC-AUC	SE	SP	ACC	MCC	ROC-AUC
[100,100]	21	Train 1	429	32	719	8	0.99	93.0586	98.8996	96.633	0.929281	0.99
	22	Train 2	501	28	651	8	0.99	94.707	98.786	96.9697	0.938979	0.99
0.5	23	Train 3	536	19	627	6	1	96.5766	99.0521	97.8956	0.957901	1
0.001	24	Train 4	537	40	608	3	1	93.0676	99.509	96.3805	0.929234	1
100	25	Train 5	517	18	633	20	0.99	96.6355	96.9372	96.8013	0.935417	0.99
		Avg	504	27.4	647.6	9	0.994	94.809	98.6368	96.936	0.938163	0.994
		SD	44.486	9.20869	42.7645	6.48074	0.00547723	1.77253	0.989086	0.578914	0.0117942	0.00547723
		Validation 1	153	17	221	5	0.99	90	97.7876	94.4444	0.88735	0.99
		Validation 2	178	12	194	12	0.99	93.6842	94.1748	93.9394	0.87859	0.99
		Validation 3	170	17	202	7	0.99	90.9091	96.6507	93.9394	0.879205	0.99
		Validation 4	150	20	224	2	0.98	88.2353	99.115	94.4444	0.889051	0.98
		Validation 5	167	7	211	11	0.99	95.977	95.045	95.4545	0.908154	0.99
		Avg	163.6	14.6	210.4	7.4	0.988	91.7611	96.5546	94.4444	0.88847	0.988
		SD	11.8025	5.12835	12.6214	4.15933	0.00447214	3.07128	2.00174	0.618558	0.0119637	0.00447214
		Test 1	239	17	133	7	0.99	93.3594	95	93.9394	0.87081	0.99
		Test 2	156	12	224	4	0.99	92.8571	98.2456	95.9596	0.917567	0.99
		Test 3	128	17	237	14	0.98	88.2759	94.4223	92.1717	0.830722	0.98
		Test 4	117	23	252	4	0.98	83.5714	98.4375	93.1818	0.851111	0.98
		Test 5	164	14	210	8	0.99	92.1348	96.3303	94.4444	0.887814	0.99
		Avg	160.8	16.6	211.2	7.4	0.986	90.0397	96.4871	93.9394	0.871605	0.986
		SD	47.809	4.15933	46.3972	4.09878	0.00547723	4.13211	1.83002	1.41729	0.0334188	0.00547723
KDR
	Model Number		TP	FN	TN	FP	ROC-AUC	SE	SP	ACC	MCC	ROC-AUC
[100,100]	21	Train 1	4545	97	685	310	0.97	97.9104	68.8442	92.7798	0.736287	0.97
	22	Train 2	4593	130	669	245	0.97	97.2475	73.1947	93.3475	0.744405	0.97
0.4	23	Train 3	4542	151	683	261	0.96	96.7824	72.3517	92.6911	0.72705	0.96
0.001	24	Train 4	4555	184	677	221	0.95	96.1173	75.3898	92.8153	0.727439	0.95
100	25	Train 5	4580	110	743	204	0.98	97.6546	78.4583	94.4297	0.794053	0.98
		Avg	4563	134.4	691.4	248.2	0.966	97.1424	73.6477	93.2127	0.745847	0.966
		SD	22.4611	34.4572	29.5093	40.8864	0.0114018	0.71476	3.57543	0.727402	0.0278811	0.0114018
		Validation 1	1497	44	220	118	0.96	97.1447	65.0888	91.3784	0.687853	0.96
		Validation 2	1507	40	239	93	0.96	97.4144	71.988	92.9218	0.744434	0.96
		Validation 3	1496	45	216	122	0.95	97.0798	63.9053	91.1123	0.677289	0.95
		Validation 4	1518	72	210	79	0.95	95.4717	72.6644	91.9638	0.688252	0.95
		Validation 5	1504	54	227	94	0.96	96.534	70.7165	92.1235	0.709725	0.96
		Avg	1504.4	51	222.4	101.2	0.956	96.7289	68.8726	91.8999	0.701511	0.956
		SD	8.90505	12.8062	11.149	18.2126	0.00547723	0.772078	4.07658	0.705438	0.0267342	0.00547723
		Test 1	1581	52	158	88	0.96	96.8157	64.2276	92.5492	0.653523	0.96
		Test 2	1505	41	202	131	0.94	97.348	60.6607	90.8462	0.660123	0.94
		Test 3	1536	46	189	108	0.94	97.0923	63.6364	91.8042	0.669715	0.94
		Test 4	1411	76	310	82	0.95	94.889	79.0816	91.5913	0.743934	0.95
		Test 5	1515	53	202	109	0.95	96.6199	64.9518	91.3784	0.668145	0.95
		Avg	1509.6	53.6	212.2	103.6	0.948	96.553	66.5116	91.6338	0.679088	0.948
		SD	62.3843	13.4276	57.5517	19.4242	0.0083666	0.970192	7.2138	0.623376	0.0368302	0.0083666
LTB4R
	Model Number		TP	FN	TN	FP	ROC-AUC	SE	SP	ACC	MCC	ROC-AUC
[100,100]	21	Train 1	170	34	624	0	0.99	83.3333	100	95.8937	0.888973	0.99
	22	Train 2	181	22	624	1	0.99	89.1626	99.84	97.2222	0.924567	0.99
0.4	23	Train 3	190	23	613	2	0.99	89.2019	99.6748	96.9807	0.920526	0.99
0.001	24	Train 4	170	35	621	2	0.99	82.9268	99.679	95.5314	0.878851	0.99
100	25	Train 5	185	21	622	0	0.99	89.8058	100	97.4638	0.932056	0.99
		Avg	179.2	27	620.8	1	0.99	86.8861	99.8388	96.6184	0.908995	0.99
		SD	8.98332	6.89202	4.54973	1	0	3.44122	0.161566	0.853994	0.0235413	0
		Validation 1	66	25	184	1	0.98	72.5275	99.4595	90.5797	0.789314	0.98
		Validation 2	67	9	199	1	0.96	88.1579	99.5	96.3768	0.908713	0.96
		Validation 3	52	6	217	1	0.97	89.6552	99.5413	97.4638	0.92257	0.97
		Validation 4	61	9	206	0	0.98	87.1429	100	96.7391	0.913756	0.98
		Validation 5	63	11	200	2	0.98	85.1351	99.0099	95.2899	0.87846	0.98
		Avg	61.8	12	201.2	1	0.974	84.5237	99.5021	95.2899	0.882563	0.974
		SD	5.97495	7.48331	11.9875	0.707107	0.00894427	6.9044	0.351256	2.74742	0.054703	0.00894427
		Test 1	40	15	221	0	0.97	72.7273	100	94.5652	0.825256	0.97
		Test 2	59	12	204	1	0.96	83.0986	99.5122	95.2899	0.875468	0.96
		Test 3	66	13	195	2	0.97	83.5443	98.9848	94.5652	0.8657	0.97
		Test 4	63	12	201	0	0.98	84	100	95.6522	0.890324	0.98
		Test 5	57	13	205	1	0.96	81.4286	99.5146	94.9275	0.864411	0.96
		Avg	57	13	205.2	0.8	0.968	80.9597	99.6023	95	0.864232	0.968
		SD	10.1242	1.22474	9.65401	0.83666	0.0083666	4.70349	0.422341	0.472406	0.0241264	0.0083666
LYN
	Model Number		TP	FN	TN	FP	ROC-AUC	SE	SP	ACC	MCC	ROC-AUC
[100,100]	21	Train 1	238	25	632	5	0.99	90.4943	99.2151	96.6667	0.918966	0.99
	22	Train 2	258	25	611	6	0.99	91.1661	99.0276	96.5556	0.919774	0.99
0.4	23	Train 3	242	29	622	7	0.99	89.2989	98.8871	96	0.904315	0.99
0.001	24	Train 4	238	27	627	8	0.99	89.8113	98.7402	96.1111	0.905627	0.99
100	25	Train 5	263	20	607	10	0.99	92.9329	98.3793	96.6667	0.922251	0.99
		Avg	247.8	25.2	619.8	7.2	0.99	90.7407	98.8498	96.4	0.914186	0.99
		SD	11.8406	3.34664	10.5688	1.92354	0	1.41331	0.316167	0.320108	0.00851218	0
		Validation 1	71	18	205	6	0.97	79.7753	97.1564	92	0.804533	0.97
		Validation 2	71	20	203	6	0.96	78.022	97.1292	91.3333	0.790919	0.96
		Validation 3	69	21	205	5	0.97	76.6667	97.619	91.3333	0.789707	0.97
		Validation 4	76	15	207	2	0.98	83.5165	99.0431	94.3333	0.865242	0.98
		Validation 5	72	18	206	4	0.97	80	98.0952	92.6667	0.822858	0.97
		Avg	71.8	18.4	205.2	4.6	0.97	79.5961	97.8086	92.3333	0.814651	0.97
		SD	2.58844	2.30217	1.48324	1.67332	0.00707107	2.57993	0.795135	1.24722	0.0312832	0.00707107
		Test 1	86	16	195	3	0.98	84.3137	98.4848	93.6667	0.858656	0.98
		Test 2	65	15	214	6	0.97	81.25	97.2727	93	0.816968	0.97
		Test 3	77	16	205	2	0.98	82.7957	99.0338	94	0.859265	0.98
		Test 4	81	17	197	5	0.97	82.6531	97.5248	92.6667	0.831547	0.97
		Test 5	62	19	215	4	0.97	76.5432	98.1735	92.3333	0.80076	0.97
		Avg	74.2	16.6	205.2	4	0.974	81.5111	98.0979	93.1333	0.833439	0.974
		SD	10.3296	1.51658	9.2844	1.58114	0.00547723	2.98149	0.714282	0.691215	0.025718	0.00547723
MAPK1
	Model Number		TP	FN	TN	FP	ROC-AUC	SE	SP	ACC	MCC	ROC-AUC
[100,100]	21	Train 1	1441	2196	6723	11	0.84	39.6206	99.8366	78.7195	0.542617	0.84
	22	Train 2	1560	2149	6650	12	0.85	42.0599	99.8199	79.1631	0.559747	0.85
0.3	23	Train 3	1932	1857	6452	130	0.86	50.9897	98.0249	80.8408	0.591355	0.86
0.001	24	Train 4	1694	2053	6584	40	0.85	45.2095	99.3961	79.8187	0.57423	0.85
100	25	Train 5	1899	1805	6521	146	0.86	51.2689	97.8101	81.1879	0.59106	0.86
		Avg	1705.2	2012	6586	67.8	0.852	45.8297	98.9775	79.946	0.571802	0.852
		SD	212.136	174.055	106.125	65.3774	0.0083666	5.22877	0.98656	1.05789	0.0209534	0.0083666
		Validation 1	518	730	2207	2	0.77	41.5064	99.9095	78.8256	0.55644	0.77
		Validation 2	498	757	2196	6	0.77	39.6813	99.7275	77.9288	0.537003	0.77
		Validation 3	554	664	2173	66	0.78	45.4844	97.0523	78.8834	0.529649	0.78
		Validation 4	558	702	2185	12	0.77	44.2857	99.4538	79.3463	0.567301	0.77
		Validation 5	582	687	2114	74	0.78	45.8629	96.6179	77.9867	0.522202	0.78
		Avg	542	708	2175	32	0.774	43.3641	98.5522	78.5942	0.542519	0.774
		SD	33.5857	36.3937	36.3662	34.9857	0.00547723	2.6741	1.58333	0.615333	0.0188199	0.00547723
		Test 1	604	720	2129	4	0.79	45.6193	99.8125	79.057	0.580098	0.79
		Test 2	517	728	2205	7	0.78	41.5261	99.6835	78.7388	0.551638	0.78
		Test 3	502	700	2184	71	0.75	41.7637	96.8514	77.6974	0.494548	0.75
		Test 4	490	712	2233	22	0.78	40.7654	99.0244	78.7677	0.533482	0.78
		Test 5	525	711	2145	76	0.75	42.4757	96.5781	77.2346	0.493891	0.75
		Avg	527.6	714.2	2179.2	36	0.77	42.4301	98.39	78.2991	0.530731	0.77
		SD	44.7917	10.4976	42.6404	34.95	0.0187083	1.88453	1.56119	0.787798	0.0372431	0.0187083
MAPK9
	Model Number		TP	FN	TN	FP	ROC-AUC	SE	SP	ACC	MCC	ROC-AUC
[100,100]	21	Train 1	708	17	650	14	1	97.6552	97.8916	97.7682	0.955295	1
	22	Train 2	721	15	639	14	1	97.962	97.856	97.9122	0.958098	1
0.4	23	Train 3	731	20	621	17	1	97.3369	97.3354	97.3362	0.946397	1
0.001	24	Train 4	716	20	638	15	1	97.2826	97.7029	97.4802	0.94947	1
100	25	Train 5	722	12	637	18	1	98.3651	97.2519	97.8402	0.956678	1
		Avg	719.6	16.8	637	15.6	1	97.7203	97.6076	97.6674	0.953188	1
		SD	8.44393	3.42053	10.3682	1.81659	0	0.451945	0.296667	0.247308	0.00501664	0
		Validation 1	232	9	208	14	0.98	96.2656	93.6937	95.0324	0.900603	0.98
		Validation 2	242	11	198	12	0.99	95.6522	94.2857	95.0324	0.899752	0.99
		Validation 3	228	6	219	10	0.99	97.4359	95.6332	96.5443	0.931004	0.99
		Validation 4	246	8	192	17	0.99	96.8504	91.866	94.6004	0.891253	0.99
		Validation 5	229	15	206	13	0.98	93.8525	94.0639	93.9525	0.878786	0.98
		Avg	235.4	9.8	204.6	13.2	0.986	96.0113	93.9085	95.0324	0.900279	0.986
		SD	8.11172	3.42053	10.2859	2.58844	0.00547723	1.3773	1.35636	0.953754	0.0192861	0.00547723
		Test 1	237	24	194	8	0.99	90.8046	96.0396	93.0886	0.86283	0.99
		Test 2	219	19	211	14	0.98	92.0168	93.7778	92.8726	0.857626	0.98
		Test 3	231	11	198	23	0.98	95.4545	89.5928	92.6566	0.853639	0.98
		Test 4	230	7	207	19	0.99	97.0464	91.5929	94.3844	0.888686	0.99
		Test 5	239	10	198	16	0.99	95.9839	92.5234	94.3844	0.887123	0.99
		Avg	231.2	14.2	201.6	16	0.986	94.2613	92.7053	93.4773	0.869981	0.986
		SD	7.82304	7.04982	7.09225	5.61249	0.00547723	2.69883	2.40968	0.842056	0.0166926	0.00547723
MAPKAPK2
	Model Number		TP	FN	TN	FP	ROC-AUC	SE	SP	ACC	MCC	ROC-AUC
[100,100]	21	Train 1	489	20	648	34	0.99	96.0707	95.0147	95.466	0.907947	0.99
	22	Train 2	451	36	682	22	0.99	92.6078	96.875	95.1301	0.899078	0.99
0.4	23	Train 3	485	23	660	23	0.99	95.4724	96.6325	96.1377	0.921049	0.99
0.001	24	Train 4	480	34	659	18	0.99	93.3852	97.3412	95.6339	0.911021	0.99
100	25	Train 5	428	49	699	15	0.99	89.7275	97.8992	94.6264	0.888366	0.99
		Avg	466.6	32.4	669.6	22.4	0.99	93.4527	96.7525	95.3988	0.905492	0.99
		SD	26.2355	11.5456	20.5499	7.23187	0	2.52632	1.08523	0.564492	0.0123803	0
		Validation 1	136	20	224	17	0.96	87.1795	92.9461	90.6801	0.804084	0.96
		Validation 2	141	24	219	13	0.96	85.4545	94.3966	90.6801	0.807613	0.96
		Validation 3	139	17	219	22	0.96	89.1026	90.8714	90.1763	0.795519	0.96
		Validation 4	151	28	202	16	0.97	84.3575	92.6606	88.9169	0.776292	0.97
		Validation 5	143	22	222	10	0.98	86.6667	95.6897	91.9395	0.833954	0.98
		Avg	142	22.2	217.2	15.6	0.966	86.5522	93.3128	90.4786	0.803492	0.966
		SD	5.65685	4.14729	8.75785	4.50555	0.00894427	1.79808	1.8265	1.08926	0.0209086	0.00894427
		Test 1	146	18	214	19	0.96	89.0244	91.8455	90.6801	0.80798	0.96
		Test 2	156	21	205	15	0.97	88.1356	93.1818	90.932	0.816261	0.97
		Test 3	143	22	210	22	0.95	86.6667	90.5172	88.9169	0.771839	0.95
		Test 4	115	21	251	10	0.97	84.5588	96.1686	92.1914	0.824843	0.97
		Test 5	150	37	202	8	0.97	80.2139	96.1905	88.665	0.77915	0.97
		Avg	142	23.8	216.4	14.8	0.964	85.7199	93.5807	90.2771	0.800015	0.964
		SD	15.8588	7.52994	19.8822	5.89067	0.00894427	3.51126	2.55259	1.47522	0.0233079	0.00894427
MET
	Model Number		TP	FN	TN	FP	ROC-AUC	SE	SP	ACC	MCC	ROC-AUC
[100,100]	21	Train 1	1683	21	664	41	0.99	98.7676	94.1844	97.4263	0.937506	0.99
	22	Train 2	1726	27	613	43	0.99	98.4598	93.4451	97.0942	0.926249	0.99
0.4	23	Train 3	1709	20	632	48	1	98.8433	92.9412	97.1773	0.929847	1
0.001	24	Train 4	1681	30	671	27	1	98.2466	96.1318	97.6339	0.942589	1
100	25	Train 5	1698	26	648	37	1	98.4919	94.5985	97.3848	0.93549	1
		Avg	1699.4	24.8	645.6	39.2	0.996	98.5618	94.2602	97.3433	0.934336	0.996
		SD	18.7697	4.20714	23.6495	7.8867	0.00547723	0.243002	1.22753	0.213691	0.00642378	0.00547723
		Validation 1	542	23	214	24	0.99	95.9292	89.916	94.1469	0.859501	0.99
		Validation 2	566	11	196	30	0.98	98.0936	86.7257	94.8941	0.872024	0.98
		Validation 3	560	15	204	24	0.99	97.3913	89.4737	95.1432	0.879463	0.99
		Validation 4	550	27	208	18	0.98	95.3206	92.0354	94.396	0.863429	0.98
		Validation 5	551	18	207	27	0.98	96.8366	88.4615	94.396	0.863074	0.98
		Avg	553.8	18.8	205.8	24.6	0.984	96.7143	89.3225	94.5953	0.867498	0.984
		SD	9.33809	6.34035	6.57267	4.44972	0.00547723	1.11068	1.95062	0.409257	0.00811981	0.00547723
		Test 1	587	15	180	21	0.99	97.5083	89.5522	95.5168	0.879526	0.99
		Test 2	524	17	229	33	0.98	96.8577	87.4046	93.7733	0.857013	0.98
		Test 3	560	7	202	34	0.98	98.7654	85.5932	94.8941	0.875812	0.98
		Test 4	556	27	200	20	0.98	95.3688	90.9091	94.1469	0.854517	0.98
		Test 5	560	18	204	21	0.99	96.8858	90.6667	95.1432	0.879142	0.99
		Avg	557.4	16.8	203	25.8	0.984	97.0772	88.8252	94.6949	0.869202	0.984
		SD	22.4009	7.15542	17.4356	7.04982	0.00547723	1.22877	2.27629	0.718632	0.0123824	0.00547723
MMP13
	Model Number		TP	FN	TN	FP	ROC-AUC	SE	SP	ACC	MCC	ROC-AUC
[100,100]	21	Train 1	1395	39	636	30	0.99	97.2803	95.4955	96.7143	0.924458	0.99
	22	Train 2	1395	47	628	30	0.99	96.7406	95.4407	96.3333	0.915544	0.99
0.4	23	Train 3	1393	27	633	47	0.99	98.0986	93.0882	96.4762	0.919131	0.99
0.001	24	Train 4	1420	23	607	50	0.99	98.4061	92.3896	96.5238	0.918655	0.99
100	25	Train 5	1444	26	583	47	0.99	98.2313	92.5397	96.5238	0.916703	0.99
		Avg	1409.4	32.4	617.4	40.8	0.99	97.7514	93.7908	96.5143	0.918898	0.99
		SD	22.3226	10.1882	22.3226	9.93479	0	0.711163	1.55325	0.13636	0.00343126	0
		Validation 1	444	18	222	16	0.99	96.1039	93.2773	95.1429	0.892013	0.99
		Validation 2	451	25	211	13	0.98	94.7479	94.1964	94.5714	0.877669	0.98
		Validation 3	473	9	194	24	0.99	98.1328	88.9908	95.2857	0.889122	0.99
		Validation 4	452	17	202	29	0.98	96.3753	87.4459	93.4286	0.850064	0.98
		Validation 5	446	8	213	33	0.98	98.2379	86.5854	94.1429	0.871257	0.98
		Avg	453.2	15.4	208.4	23	0.984	96.7195	90.0992	94.5143	0.876025	0.984
		SD	11.5629	7.0214	10.7378	8.45577	0.00547723	1.47373	3.44613	0.759968	0.0167822	0.00547723
		Test 1	466	26	194	14	0.98	94.7154	93.2692	94.2857	0.866142	0.98
		Test 2	446	24	218	12	0.99	94.8936	94.7826	94.8571	0.885625	0.99
		Test 3	473	13	183	31	0.98	97.3251	85.514	93.7143	0.849997	0.98
		Test 4	465	11	205	19	0.99	97.6891	91.5179	95.7143	0.9009	0.99
		Test 5	452	12	209	27	0.97	97.4138	88.5593	94.4286	0.874407	0.97
		Avg	460.4	17.2	201.8	20.6	0.982	96.4074	90.7286	94.6	0.875414	0.982
		SD	11.0589	7.19027	13.5904	8.20366	0.0083666	1.47071	3.72191	0.745052	0.0192796	0.0083666
MMP2
	Model Number		TP	FN	TN	FP	ROC-AUC	SE	SP	ACC	MCC	ROC-AUC
[100,100]	21	Train 1	1697	61	951	60	0.99	96.5301	94.0653	95.6302	0.905764	0.99
	22	Train 2	1690	46	975	58	0.99	97.3502	94.3853	96.2441	0.919558	0.99
0.4	23	Train 3	1686	75	942	66	0.99	95.7411	93.4524	94.9079	0.890257	0.99
0.001	24	Train 4	1734	43	910	82	0.99	97.5802	91.7339	95.4857	0.901395	0.99
100	25	Train 5	1694	96	927	52	0.99	94.6369	94.6885	94.6551	0.884774	0.99
		Avg	1700.2	64.2	941	63.6	0.99	96.3677	93.6651	95.3846	0.90035	0.99
		SD	19.3442	21.9021	24.5662	11.4368	0	1.20937	1.17271	0.626244	0.0136364	0
		Validation 1	539	34	312	38	0.97	94.0663	89.1429	92.1993	0.833982	0.97
		Validation 2	573	37	280	33	0.97	93.9344	89.4569	92.416	0.831365	0.97
		Validation 3	547	31	312	33	0.98	94.6367	90.4348	93.0661	0.851719	0.98
		Validation 4	562	28	282	51	0.98	95.2542	84.6847	91.441	0.812822	0.98
		Validation 5	544	35	319	25	0.98	93.9551	92.7326	93.4995	0.862021	0.98
		Avg	553	33	301	36	0.976	94.3694	89.2904	92.5244	0.838382	0.976
		SD	14.089	3.53553	18.4932	9.59166	0.00547723	0.571639	2.93343	0.796151	0.0190959	0.00547723
		Test 1	568	39	288	28	0.97	93.575	91.1392	92.7411	0.840421	0.97
		Test 2	564	28	290	41	0.96	95.2703	87.6133	92.5244	0.836473	0.96
		Test 3	562	37	286	38	0.97	93.823	88.2716	91.8743	0.821531	0.97
		Test 4	536	35	290	62	0.97	93.8704	82.3864	89.4908	0.775489	0.97
		Test 5	533	36	305	49	0.96	93.6731	86.1582	90.7909	0.804252	0.96
		Avg	552.6	35	291.8	43.6	0.966	94.0424	87.1137	91.4843	0.815633	0.966
		SD	16.6973	4.1833	7.56307	12.7397	0.00547723	0.696463	3.20375	1.34798	0.0265737	0.00547723
MMP3
	Model Number		TP	FN	TN	FP	ROC-AUC	SE	SP	ACC	MCC	ROC-AUC
[100,100]	21	Train 1	980	43	624	30	0.99	95.7967	95.4128	95.647	0.908957	0.99
	22	Train 2	1000	46	594	37	0.99	95.6023	94.1363	95.0507	0.894912	0.99
0.4	23	Train 3	1020	31	588	38	0.99	97.0504	93.9297	95.8855	0.911899	0.99
0.001	24	Train 4	1035	46	565	31	0.99	95.7447	94.7987	95.4085	0.90052	0.99
100	25	Train 5	1035	35	568	39	0.99	96.729	93.575	95.5874	0.904341	0.99
		Avg	1014	40.2	587.8	35	0.99	96.1846	94.3705	95.5158	0.904126	0.99
		SD	23.8223	6.83374	23.7739	4.1833	0	0.657475	0.733456	0.310994	0.00674001	0
		Validation 1	336	19	182	22	0.97	94.6479	89.2157	92.6655	0.841324	0.97
		Validation 2	327	19	199	14	0.98	94.5087	93.4272	94.0966	0.875565	0.98
		Validation 3	321	11	198	29	0.98	96.6867	87.2247	92.8444	0.851718	0.98
		Validation 4	359	11	176	13	0.98	97.027	93.1217	95.7066	0.903856	0.98
		Validation 5	345	17	181	16	0.97	95.3039	91.8782	94.0966	0.87082	0.97
		Avg	337.6	15.4	187.2	18.8	0.976	95.6348	90.9735	93.8819	0.868656	0.976
		SD	15.0266	4.09878	10.5688	6.68581	0.00547723	1.16153	2.67384	1.22249	0.0241111	0.00547723
		Test 1	361	20	166	12	0.97	94.7507	93.2584	94.2755	0.87014	0.97
		Test 2	350	17	176	16	0.99	95.3678	91.6667	94.0966	0.869273	0.99
		Test 3	354	22	165	18	0.97	94.1489	90.1639	92.8444	0.838535	0.97
		Test 4	294	14	226	25	0.98	95.4545	90.0398	93.0233	0.85911	0.98
		Test 5	310	17	208	24	0.97	94.8012	89.6552	92.6655	0.848567	0.97
		Avg	333.8	18	188.2	19	0.976	94.9046	90.9568	93.381	0.857125	0.976
		SD	29.8362	3.08221	27.3898	5.47723	0.00894427	0.529729	1.49709	0.748354	0.013599	0.00894427
MMP9
	Model Number		TP	FN	TN	FP	ROC-AUC	SE	SP	ACC	MCC	ROC-AUC
[100,100]	21	Train 1	1289	246	1062	61	0.96	83.9739	94.5681	88.45	0.776025	0.96
	22	Train 2	1362	210	1027	59	0.96	86.6412	94.5672	89.8796	0.800314	0.96
0.4	23	Train 3	1318	229	1046	65	0.96	85.1972	94.1494	88.9391	0.783365	0.96
0.001	24	Train 4	1342	193	1064	59	0.97	87.4267	94.7462	90.5192	0.812992	0.97
100	25	Train 5	1353	220	1010	75	0.96	86.014	93.0876	88.9014	0.779736	0.96
		Avg	1332.8	219.6	1041.8	63.8	0.962	85.8506	94.2237	89.3378	0.790486	0.962
		SD	29.5076	19.9073	23.1776	6.72309	0.00447214	1.33086	0.671936	0.84067	0.0156405	0.00447214
		Validation 1	426	71	348	41	0.93	85.7143	89.4602	87.3589	0.747236	0.93
		Validation 2	445	76	327	38	0.93	85.4127	89.589	87.1332	0.741328	0.93
		Validation 3	437	84	326	39	0.93	83.8772	89.3151	86.1174	0.722495	0.93
		Validation 4	427	101	320	38	0.92	80.8712	89.3855	84.3115	0.690365	0.92
		Validation 5	429	70	336	51	0.93	85.9719	86.8217	86.3431	0.724629	0.93
		Avg	432.8	80.4	331.4	41.4	0.928	84.3695	88.9143	86.2528	0.72521	0.928
		SD	8.07465	12.7789	10.8995	5.50454	0.00447214	2.11807	1.17418	1.2035	0.0221745	0.00447214
		Test 1	476	74	299	37	0.93	86.5455	88.9881	87.4718	0.742297	0.93
		Test 2	385	104	361	36	0.91	78.7321	90.932	84.1986	0.693731	0.91
		Test 3	432	82	334	38	0.93	84.0467	89.7849	86.456	0.73013	0.93
		Test 4	435	84	314	53	0.91	83.815	85.5586	84.5372	0.687004	0.91
		Test 5	437	73	334	42	0.93	85.6863	88.8298	87.0203	0.739033	0.93
		Avg	433	83.4	328.4	41.2	0.922	83.7651	88.8187	85.9368	0.718439	0.922
		SD	32.3033	12.482	23.4371	6.97854	0.0109545	3.03455	2.00355	1.48152	0.026118	0.0109545
NEK2
	Model Number		TP	FN	TN	FP	ROC-AUC	SE	SP	ACC	MCC	ROC-AUC
[100,100]	21	Train 1	146	29	637	1	0.99	83.4286	99.8433	96.31	0.889266	0.99
	22	Train 2	131	39	643	0	0.99	77.0588	100	95.203	0.852363	0.99
0.3	23	Train 3	162	25	619	7	0.98	86.631	98.8818	96.064	0.886855	0.98
0.001	24	Train 4	167	31	611	4	0.99	84.3434	99.3496	95.695	0.881442	0.99
100	30	Train 5	153	21	631	8	1	87.931	98.748	96.433	0.892078	1
		Avg	151.8	29	628.2	4	0.99	83.8786	99.3645	95.941	0.880401	0.99
		SD	14.1669	6.78233	13.0843	3.53553	0.00707107	4.21088	0.558194	0.499633	0.0161541	0.00707107
		Validation 1	32	18	218	3	0.93	64	98.6425	92.2509	0.724537	0.93
		Validation 2	40	14	210	7	0.97	74.0741	96.7742	92.2509	0.747452	0.97
		Validation 3	39	18	211	3	0.95	68.4211	98.5981	92.2509	0.754746	0.95
		Validation 4	41	15	212	3	0.98	73.2143	98.6047	93.3579	0.78852	0.98
		Validation 5	56	15	197	3	0.97	78.8732	98.5	93.3579	0.824406	0.97
		Avg	41.6	16	209.6	3.8	0.96	71.7165	98.2239	92.6937	0.767932	0.96
		SD	8.79204	1.87083	7.70065	1.78885	0.02	5.68825	0.81212	0.606335	0.039018	0.02
		Test 1	59	14	195	3	0.99	80.8219	98.4848	93.7269	0.837597	0.99
		Test 2	51	23	193	4	0.96	68.9189	97.9695	90.0369	0.740955	0.96
		Test 3	42	12	213	4	0.97	77.7778	98.1567	94.0959	0.80797	0.97
		Test 4	28	16	226	1	0.97	63.6364	99.5595	93.7269	0.753913	0.97
		Test 5	33	20	216	2	0.89	62.2642	99.0826	91.8819	0.72555	0.89
		Avg	42.6	17	208.6	2.8	0.956	70.6838	98.6506	92.6937	0.773197	0.956
		SD	12.7004	4.47214	14.188	1.30384	0.0384708	8.31832	0.661043	1.71894	0.0475348	0.0384708
P2RY1
	Model Number		TP	FN	TN	FP	ROC-AUC	SE	SP	ACC	MCC	ROC-AUC
[100,100]	21	Train 1	331	12	647	6	0.99	96.5015	99.0812	98.1928	0.959898	0.99
	22	Train 2	296	14	682	4	1	95.4839	99.4169	98.1928	0.95774	1
0.4	23	Train 3	358	8	629	1	1	97.8142	99.8413	99.0964	0.980597	1
0.001	24	Train 4	315	15	663	3	1	95.4545	99.5495	98.1928	0.959197	1
100	30	Train 5	330	11	650	5	0.99	96.7742	99.2366	98.3936	0.964262	0.99
		Avg	326	12	654.2	3.8	0.996	96.4057	99.4251	98.4137	0.964339	0.996
		SD	22.8364	2.73861	19.7155	1.92354	0.00547723	0.985306	0.292644	0.391438	0.00940793	0.00547723
		Validation 1	100	6	224	2	0.99	94.3396	99.115	97.5904	0.944374	0.99
		Validation 2	106	7	216	3	0.98	93.8053	98.6301	96.988	0.932683	0.98
		Validation 3	104	5	220	3	0.99	95.4128	98.6547	97.5904	0.945197	0.99
		Validation 4	102	5	222	3	0.99	95.3271	98.6667	97.5904	0.944658	0.99
		Validation 5	107	8	215	2	0.99	93.0435	99.0783	96.988	0.933417	0.99
		Avg	103.8	6.2	219.4	2.6	0.988	94.3857	98.829	97.3494	0.940066	0.988
		SD	2.86356	1.30384	3.84708	0.547723	0.00447214	1.01017	0.245086	0.329953	0.00641666	0.00447214
		Test 1	106	5	220	1	0.99	95.4955	99.5475	98.1928	0.959389	0.99
		Test 2	134	3	194	1	1	97.8102	99.4872	98.7952	0.975167	1
		Test 3	78	7	243	4	0.96	91.7647	98.3806	96.6867	0.912271	0.96
		Test 4	121	2	206	3	1	98.374	98.5646	98.494	0.967787	1
		Test 5	88	16	228	0	0.97	84.6154	100	95.1807	0.889195	0.97
		Avg	105.4	6.6	218.2	1.8	0.984	93.612	99.196	97.4699	0.940762	0.984
		SD	22.9957	5.59464	19.0316	1.64317	0.0181659	5.66129	0.692526	1.51503	0.0378544	0.0181659
PAK4
	Model Number		TP	FN	TN	FP	ROC-AUC	SE	SP	ACC	MCC	ROC-AUC
[100,100]	21	Train 1	194	26	668	0	0.99	88.1818	100	97.0721	0.921294	0.99
	22	Train 2	222	13	651	2	0.99	94.4681	99.6937	98.3108	0.956439	0.99
0.4	23	Train 3	212	18	658	0	0.99	92.1739	100	97.973	0.947204	0.99
0.001	24	Train 4	214	17	657	0	0.99	92.6407	100	98.0856	0.950284	0.99
150	30	Train 5	220	10	657	1	1	95.6522	99.848	98.7613	0.967658	1
		Avg	212.4	16.8	658.2	0.6	0.992	92.6233	99.9083	98.0405	0.948576	0.992
		SD	11.0815	6.05805	6.14003	0.894427	0.00447214	2.85072	0.136843	0.619881	0.0171399	0.00447214
		Validation 1	52	11	232	1	0.99	82.5397	99.5708	95.9459	0.876609	0.99
		Validation 2	63	16	212	5	0.97	79.7468	97.6959	92.9054	0.814333	0.97
		Validation 3	62	10	223	1	0.99	86.1111	99.5536	96.2838	0.897933	0.99
		Validation 4	62	17	215	2	0.95	78.481	99.0783	93.5811	0.833381	0.95
		Validation 5	62	19	214	1	0.96	76.5432	99.5349	93.2432	0.828654	0.96
		Avg	60.2	14.6	219.2	2	0.972	80.6844	99.0867	94.3919	0.850182	0.972
		SD	4.60435	3.91152	8.28855	1.73205	0.0178885	3.73412	0.804321	1.59537	0.0353886	0.0178885
		Test 1	82	15	198	1	0.97	84.5361	99.4975	94.5946	0.878085	0.97
		Test 2	62	4	226	4	0.98	93.9394	98.2609	97.2973	0.922003	0.98
		Test 3	52	26	218	0	0.98	66.6667	100	91.2162	0.77177	0.98
		Test 4	53	17	225	1	0.99	75.7143	99.5575	93.9189	0.828192	0.99
		Test 5	54	15	222	5	0.95	78.2609	97.7974	93.2432	0.804977	0.95
		Avg	60.6	15.4	217.8	2.2	0.974	79.8235	99.0226	94.0541	0.841005	0.974
		SD	12.6016	7.82943	11.4978	2.16795	0.0151658	10.1722	0.941863	2.21019	0.0595635	0.0151658
PDE4A
	Model Number		TP	FN	TN	FP	ROC-AUC	SE	SP	ACC	MCC	ROC-AUC
[100,100]	21	Train 1	362	32	595	13	0.99	91.8782	97.8618	95.509	0.905809	0.99
	22	Train 2	354	32	607	9	0.99	91.7098	98.539	95.9082	0.913738	0.99
0.5	23	Train 3	378	28	584	12	0.99	93.1034	97.9866	96.008	0.917168	0.99
0.001	24	Train 4	364	25	600	13	0.99	93.5733	97.8793	96.2076	0.920005	0.99
100	25	Train 5	345	34	616	7	0.99	91.029	98.8764	95.9082	0.913317	0.99
		Avg	360.6	30.2	600.4	10.8	0.99	92.2588	98.2286	95.9082	0.914007	0.99
		SD	12.2801	3.63318	12.0955	2.68328	0	1.04879	0.455819	0.254442	0.00533206	0
		Validation 1	117	11	200	6	0.96	91.4062	97.0874	94.9102	0.891983	0.96
		Validation 2	103	19	203	9	0.96	84.4262	95.7547	91.6168	0.817774	0.96
		Validation 3	118	19	187	10	0.95	86.1314	94.9239	91.3174	0.820042	0.95
		Validation 4	125	10	187	12	0.98	92.5926	93.9698	93.4132	0.863634	0.98
		Validation 5	116	20	193	5	0.97	85.2941	97.4747	92.515	0.846032	0.97
		Avg	115.8	15.8	194	8.4	0.964	87.9701	95.8421	92.7545	0.847893	0.964
		SD	7.98123	4.86826	7.34847	2.88097	0.0114018	3.75084	1.46393	1.45756	0.0311369	0.0114018
		Test 1	114	17	196	7	0.96	87.0229	96.5517	92.8144	0.848937	0.96
		Test 2	137	8	178	11	0.98	94.4828	94.1799	94.3114	0.884644	0.98
		Test 3	75	35	219	5	0.97	68.1818	97.7679	88.024	0.726225	0.97
		Test 4	114	15	191	14	0.95	88.3721	93.1707	91.3174	0.816618	0.95
		Test 5	113	25	191	5	0.96	81.8841	97.449	91.018	0.817248	0.96
		Avg	110.6	20	195	8.4	0.964	83.9887	95.8238	91.497	0.818734	0.964
		SD	22.3226	10.3441	14.9833	3.97492	0.0114018	9.91001	2.04277	2.34414	0.0587812	0.0114018
PDE5A
	Model Number		TP	FN	TN	FP	ROC-AUC	SE	SP	ACC	MCC	ROC-AUC
[100,100]	21	Train 1	904	43	657	31	0.98	95.4593	95.4942	95.474	0.907473	0.98
	22	Train 2	911	32	635	57	0.98	96.6066	91.763	94.5566	0.888405	0.98
0.4	23	Train 3	909	36	658	32	0.99	96.1905	95.3623	95.841	0.914824	0.99
0.001	24	Train 4	856	54	694	31	0.98	94.0659	95.7241	94.8012	0.895376	0.98
100	30	Train 5	888	39	672	36	0.98	95.7929	94.9153	95.4128	0.906634	0.98
		Avg	893.6	40.8	663.2	37.4	0.982	95.623	94.6518	95.2171	0.902542	0.982
		SD	22.8758	8.40833	21.7187	11.149	0.00447214	0.970766	1.64156	0.525069	0.0105251	0.00447214
		Validation 1	296	23	204	22	0.97	92.79	90.2655	91.7431	0.830025	0.97
		Validation 2	286	17	209	33	0.96	94.3894	86.3636	90.8257	0.814401	0.96
		Validation 3	290	23	208	24	0.96	92.6518	89.6552	91.3761	0.823534	0.96
		Validation 4	261	27	233	24	0.96	90.625	90.6615	90.6422	0.812404	0.96
		Validation 5	286	23	220	16	0.96	92.5566	93.2203	92.844	0.855065	0.96
		Avg	283.8	22.6	214.8	23.8	0.962	92.6026	90.0332	91.4862	0.827086	0.962
		SD	13.3866	3.57771	11.7771	6.09918	0.00447214	1.33635	2.46044	0.876135	0.0171797	0.00447214
		Test 1	267	18	215	45	0.9	93.6842	82.6923	88.4404	0.771105	0.9
		Test 2	290	15	211	29	0.97	95.082	87.9167	91.9266	0.836329	0.97
		Test 3	263	30	234	18	0.96	89.7611	92.8571	91.1927	0.824242	0.96
		Test 4	324	29	179	13	0.97	91.7847	93.2292	92.2936	0.835952	0.97
		Test 5	292	23	208	22	0.96	92.6984	90.4348	91.7431	0.83085	0.96
		Avg	287.2	23	209.4	25.4	0.952	92.6021	89.426	91.1193	0.819696	0.952
		SD	24.3865	6.59545	19.7813	12.4218	0.0294958	2.00434	4.32652	1.54935	0.0276	0.0294958
PIK3CA
	Model Number		TP	FN	TN	FP	ROC-AUC	SE	SP	ACC	MCC	ROC-AUC
[100,100]	21	Train 1	2787	19	1212	68	1	99.3229	94.6875	97.8708	0.95037	1
	22	Train 2	2848	16	1119	103	0.99	99.4413	91.5712	97.0876	0.930338	0.99
0.4	23	Train 3	2881	29	1115	61	0.99	99.0034	94.8129	97.7974	0.946007	0.99
0.001	24	Train 4	2801	16	1170	99	1	99.432	92.1986	97.1855	0.934165	1
100	30	Train 5	2784	22	1193	87	0.99	99.216	93.2031	97.3324	0.93779	0.99
		Avg	2820.2	20.4	1161.8	83.6	0.994	99.2831	93.2947	97.4547	0.939734	0.994
		SD	42.5758	5.41295	43.5396	18.5688	0.00547723	0.181327	1.45131	0.358021	0.0082998	0.00547723
		Validation 1	913	11	395	43	0.99	98.8095	90.1826	96.0352	0.908726	0.99
		Validation 2	936	9	367	50	0.98	99.0476	88.0096	95.6681	0.897545	0.98
		Validation 3	936	16	382	28	0.99	98.3193	93.1707	96.7695	0.922793	0.99
		Validation 4	926	8	377	51	0.99	99.1435	88.0841	95.6681	0.899231	0.99
		Validation 5	933	5	386	38	0.99	99.467	91.0377	96.8429	0.926312	0.99
		Avg	928.8	9.8	381.4	42	0.988	98.9574	90.097	96.1968	0.910922	0.988
		SD	9.73139	4.08656	10.4067	9.46044	0.00447214	0.427612	2.16501	0.576721	0.0132118	0.00447214
		Test 1	986	8	336	32	0.99	99.1952	91.3043	97.0631	0.924933	0.99
		Test 2	911	4	407	40	0.99	99.5628	91.0515	96.7695	0.926936	0.99
		Test 3	843	19	464	36	0.98	97.7958	92.8	95.9618	0.912807	0.98
		Test 4	967	6	332	57	0.99	99.3834	85.347	95.3744	0.886058	0.99
		Test 5	972	8	354	28	0.99	99.1837	92.6702	97.3568	0.934088	0.99
		Avg	935.8	9	378.6	38.6	0.988	99.0242	90.6346	96.5051	0.916964	0.988
		SD	59.2258	5.83095	56.3276	11.2161	0.00447214	0.704041	3.05831	0.818575	0.0188987	0.00447214
PPARG
	Model Number		TP	FN	TN	FP	ROC-AUC	SE	SP	ACC	MCC	ROC-AUC
[100,100]	21	Train 1	2074	533	4146	234	0.94	79.555	94.6575	89.0225	0.763116	0.94
	22	Train 2	1872	716	4251	148	0.93	72.3338	96.6356	87.6342	0.734671	0.93
0.4	23	Train 3	1996	662	4185	144	0.94	75.0941	96.6736	88.4643	0.755887	0.94
0.001	24	Train 4	1904	717	4261	105	0.94	72.644	97.5951	88.2353	0.75134	0.94
100	30	Train 5	1887	671	4333	96	0.94	73.7686	97.8325	89.0225	0.765072	0.94
		Avg	1946.6	659.8	4235.2	145.4	0.938	74.6791	96.6789	88.4757	0.754017	0.938
		SD	86.0279	75.231	72.3823	54.615	0.00447214	2.93333	1.25079	0.583952	0.0121442	0.00447214
		Validation 1	680	207	1335	107	0.9	76.6629	92.5798	86.5178	0.710867	0.9
		Validation 2	640	243	1397	49	0.91	72.4802	96.6113	87.4624	0.734442	0.91
		Validation 3	641	257	1365	66	0.9	71.3808	95.3878	86.1314	0.706799	0.9
		Validation 4	601	281	1405	42	0.9	68.1406	97.0974	86.1314	0.70784	0.9
		Validation 5	587	279	1404	59	0.89	67.7829	95.9672	85.4873	0.688183	0.89
		Avg	629.8	253.4	1381.2	64.6	0.9	71.2895	95.5287	86.3461	0.709626	0.9
		SD	36.7791	30.3776	30.5483	25.4224	0.00707107	3.62324	1.7707	0.725494	0.0164954	0.00707107
		Test 1	651	217	1339	122	0.9	75	91.6496	85.4444	0.684365	0.9
		Test 2	656	235	1383	55	0.92	73.6251	96.1752	87.5483	0.736634	0.92
		Test 3	565	241	1475	48	0.91	70.0993	96.8483	87.5912	0.723208	0.91
		Test 4	581	278	1421	49	0.89	67.6368	96.6667	85.9596	0.69843	0.89
		Test 5	661	277	1326	65	0.9	70.4691	95.3271	85.3156	0.696676	0.9
		Avg	622.8	249.6	1388.8	67.8	0.904	71.3661	95.3334	86.3718	0.707863	0.904
		SD	45.9478	26.9592	61.0835	31.0435	0.0114018	2.94218	2.14196	1.1199	0.0213869	0.0114018
PTPN1
	Model Number		TP	FN	TN	FP	ROC-AUC	SE	SP	ACC	MCC	ROC-AUC
[100,100]	21	Train 1	763	116	1262	49	0.98	86.8032	96.2624	92.4658	0.842974	0.98
	22	Train 2	719	132	1299	40	0.98	84.4888	97.0127	92.1461	0.834796	0.98
0.3	23	Train 3	785	121	1236	48	0.98	86.6446	96.2617	92.2831	0.84105	0.98
0.001	24	Train 4	762	106	1252	70	0.97	87.788	94.705	91.9635	0.831345	0.97
100	30	Train 5	835	98	1175	82	0.97	89.4962	93.4765	91.7808	0.831659	0.97
		Avg	772.8	114.6	1244.8	57.8	0.976	87.0442	95.5437	92.1279	0.836365	0.976
		SD	42.2043	13.1833	45.3729	17.4986	0.00547723	1.82438	1.42886	0.267426	0.00537212	0.00547723
		Validation 1	201	71	412	46	0.92	73.8971	89.9563	83.9726	0.652498	0.92
		Validation 2	207	75	403	45	0.9	73.4043	89.9554	83.5616	0.648876	0.9
		Validation 3	215	70	406	39	0.93	75.4386	91.236	85.0685	0.682877	0.93
		Validation 4	247	59	394	30	0.94	80.719	92.9245	87.8082	0.74884	0.94
		Validation 5	234	68	374	54	0.91	77.4834	87.3832	83.2877	0.653641	0.91
		Avg	220.8	68.6	397.8	42.8	0.92	76.1885	90.2911	84.7397	0.677346	0.92
		SD	19.2146	5.94138	14.8054	8.92749	0.0158114	2.99027	2.03153	1.84449	0.0422251	0.0158114
		Test 1	231	89	362	48	0.88	72.1875	88.2927	81.2329	0.617575	0.88
		Test 2	233	105	346	46	0.89	68.9349	88.2653	79.3151	0.58696	0.89
		Test 3	170	110	403	47	0.86	60.7143	89.5556	78.4932	0.534816	0.86
		Test 4	215	82	371	62	0.89	72.3906	85.6813	80.274	0.587894	0.89
		Test 5	184	52	433	61	0.91	77.9661	87.6518	84.5205	0.649962	0.91
		Avg	206.6	87.6	383	52.8	0.886	70.4387	87.8893	80.7671	0.595441	0.886
		SD	28.3425	22.9412	34.8353	7.98123	0.0181659	6.33158	1.41529	2.33601	0.0426226	0.0181659
PTPN11
	Model Number		TP	FN	TN	FP	ROC-AUC	SE	SP	ACC	MCC	ROC-AUC
[100,100]	21	Train 1	140	77	715	7	0.97	64.5161	99.0305	91.0543	0.737173	0.97
	22	Train 2	175	39	714	11	0.98	81.7757	98.4828	94.6752	0.84472	0.98
0.3	23	Train 3	95	112	730	2	0.96	45.8937	99.7268	87.8594	0.621382	0.96
0.001	24	Train 4	156	52	723	8	0.97	75	98.9056	93.6102	0.808342	0.97
150	30	Train 5	136	67	720	16	0.97	66.9951	97.8261	91.1608	0.724427	0.97
		Avg	140.4	69.4	720.4	8.8	0.97	66.8361	98.7943	91.672	0.747209	0.97
		SD	29.6699	27.8622	6.50385	5.1672	0.00707107	13.5447	0.70217	2.6436	0.0861651	0.00707107
		Validation 1	18	37	251	7	0.89	32.7273	97.2868	85.9425	0.421357	0.89
		Validation 2	37	38	225	13	0.86	49.3333	94.5378	83.7061	0.511135	0.86
		Validation 3	21	66	226	0	0.89	24.1379	100	78.9137	0.432228	0.89
		Validation 4	31	43	234	5	0.89	41.8919	97.9079	84.6645	0.530036	0.89
		Validation 5	28	48	222	15	0.86	36.8421	93.6709	79.8722	0.380058	0.86
		Avg	27	46.4	231.6	8	0.878	36.9865	96.6807	82.6198	0.454963	0.878
		SD	7.64853	11.8025	11.7175	6.08276	0.0164317	9.4836	2.57596	3.06942	0.0633407	0.0164317
		Test 1	31	51	227	4	0.9	37.8049	98.2684	82.4281	0.503318	0.9
		Test 2	37	28	234	14	0.86	56.9231	94.3548	86.5815	0.563219	0.86
		Test 3	24	36	247	6	0.93	40	97.6285	86.5815	0.503151	0.93
		Test 4	20	52	237	4	0.82	27.7778	98.3402	82.1086	0.413105	0.82
		Test 5	25	50	235	3	0.93	33.3333	98.7395	83.0671	0.479684	0.93
		Avg	27.4	43.4	236	6.2	0.888	39.1678	97.4663	84.1534	0.492495	0.888
		SD	6.65582	10.8074	7.2111	4.49444	0.0476445	10.9724	1.78435	2.24326	0.0540819	0.0476445
PTPN2
	Model Number		TP	FN	TN	FP	ROC-AUC	SE	SP	ACC	MCC	ROC-AUC
[100,100]	21	Train 1	128	65	729	5	0.96	66.3212	99.3188	92.4488	0.760255	0.96
	22	Train 2	145	50	724	8	0.96	74.359	98.9071	93.7433	0.804377	0.96
0.4	23	Train 3	124	65	731	7	0.96	65.6085	99.0515	92.233	0.747829	0.96
0.001	24	Train 4	144	59	717	7	0.97	70.936	99.0331	92.8803	0.783618	0.97
100	30	Train 5	149	57	714	7	0.97	72.3301	99.0291	93.096	0.792979	0.97
		Avg	138	59.2	723	6.8	0.964	69.9109	99.0679	92.8803	0.777812	0.964
		SD	11.2027	6.26099	7.38241	1.09545	0.00547723	3.81068	0.151482	0.590855	0.0233274	0.00547723
		Validation 1	37	33	236	3	0.93	52.8571	98.7448	88.3495	0.643439	0.93
		Validation 2	48	31	228	2	0.9	60.7595	99.1304	89.3204	0.709408	0.9
		Validation 3	35	44	228	2	0.92	44.3038	99.1304	85.1133	0.583612	0.92
		Validation 4	44	28	234	3	0.94	61.1111	98.7342	89.9676	0.704483	0.94
		Validation 5	43	27	235	4	0.9	61.4286	98.3264	89.9676	0.696502	0.9
		Avg	41.4	32.6	232.2	2.8	0.918	56.092	98.8132	88.5437	0.667489	0.918
		SD	5.31977	6.80441	3.89872	0.83666	0.0178885	7.49803	0.335118	2.02879	0.0538082	0.0178885
		Test 1	52	24	228	5	0.94	68.4211	97.8541	90.6149	0.735864	0.94
		Test 2	29	36	244	0	0.94	44.6154	100	88.3495	0.623531	0.94
		Test 3	16	55	237	1	0.92	22.5352	99.5798	81.877	0.408028	0.92
		Test 4	24	40	244	1	0.88	37.5	99.5918	86.7314	0.551216	0.88
		Test 5	40	23	240	6	0.92	63.4921	97.561	90.6149	0.691016	0.92
		Avg	32.2	35.6	238.6	2.6	0.92	47.3127	98.9173	87.6375	0.601931	0.92
		SD	14.0784	13.1263	6.61816	2.70185	0.0244949	18.8734	1.12208	3.61389	0.128949	0.0244949
RAF1
	Model Number		TP	FN	TN	FP	ROC-AUC	SE	SP	ACC	MCC	ROC-AUC
[100,100]	21	Train 1	768	16	673	4	1	97.9592	99.4092	98.6311	0.972639	1
	22	Train 2	758	21	676	6	1	97.3042	99.1202	98.152	0.96313	1
0.4	23	Train 3	813	14	624	10	1	98.3071	98.4227	98.3573	0.966602	1
0.001	24	Train 4	803	15	638	5	1	98.1663	99.2224	98.6311	0.972363	1
100	30	Train 5	839	12	603	7	1	98.5899	98.8525	98.6995	0.973318	1
		Avg	796.2	15.6	642.8	6.4	1	98.0653	99.0054	98.4942	0.96961	1
		SD	33.222	3.36155	31.523	2.30217	0	0.48331	0.382822	0.232113	0.00451487	0
		Validation 1	278	10	196	3	1	96.5278	98.4925	97.3306	0.94548	1
		Validation 2	257	8	217	5	0.99	96.9811	97.7477	97.3306	0.946324	0.99
		Validation 3	252	7	221	7	0.99	97.2973	96.9298	97.1253	0.942271	0.99
		Validation 4	255	8	214	10	1	96.9582	95.5357	96.3039	0.925583	1
		Validation 5	265	5	205	12	0.99	98.1481	94.47	96.5092	0.92952	0.99
		Avg	261.4	7.6	210.6	7.4	0.994	97.1825	96.6352	96.9199	0.937836	0.994
		SD	10.4547	1.81659	10.0648	3.64692	0.00547723	0.605224	1.63331	0.481562	0.00961036	0.00547723
		Test 1	266	13	205	3	0.99	95.3405	98.5577	96.7146	0.934085	0.99
		Test 2	297	10	179	1	1	96.7427	99.4444	97.7413	0.95276	1
		Test 3	259	6	206	16	1	97.7358	92.7928	95.4825	0.909392	1
		Test 4	263	7	208	9	0.99	97.4074	95.8525	96.7146	0.933476	0.99
		Test 5	223	7	250	7	0.99	96.9565	97.2763	97.1253	0.942328	0.99
		Avg	261.6	8.6	209.6	7.2	0.994	96.8366	96.7847	96.7556	0.934408	0.994
		SD	26.3211	2.88097	25.5206	5.84808	0.00547723	0.92141	2.61073	0.826473	0.0160178	0.00547723
RARA
	Model Number		TP	FN	TN	FP	ROC-AUC	SE	SP	ACC	MCC	ROC-AUC
[100,100]	21	Train 1	131	77	1952	3	0.93	62.9808	99.8465	96.3014	0.768352	0.93
	22	Train 2	115	98	1950	0	0.96	53.9906	100	95.4693	0.716987	0.96
0.2	23	Train 3	124	95	1943	1	0.94	56.621	99.9486	95.5617	0.731301	0.94
0.001	24	Train 4	135	84	1942	2	0.95	61.6438	99.8971	96.024	0.762175	0.95
100	30	Train 5	115	105	1941	2	0.97	52.2727	99.8971	95.0532	0.697142	0.97
		Avg	124	91.8	1945.6	1.6	0.95	57.5018	99.9179	95.6819	0.735191	0.95
		SD	9.11043	11.2116	5.02991	1.14018	0.0158114	4.68036	0.0583898	0.488837	0.0300915	0.0158114
		Validation 1	32	28	661	0	0.87	53.3333	100	96.1165	0.715304	0.87
		Validation 2	44	29	647	1	0.91	60.274	99.8457	95.8391	0.749697	0.91
		Validation 3	39	27	654	1	0.94	59.0909	99.8473	96.1165	0.742482	0.94
		Validation 4	42	33	645	1	0.89	56	99.8452	95.2843	0.719919	0.89
		Validation 5	27	44	650	0	0.9	38.0282	100	93.8974	0.596801	0.9
		Avg	36.8	32.2	651.4	0.6	0.902	53.3453	99.9076	95.4508	0.704841	0.902
		SD	7.12039	6.97854	6.34823	0.547723	0.0258844	8.98166	0.0843149	0.932468	0.0621256	0.0258844
		Test 1	52	36	632	1	0.88	59.0909	99.842	94.8682	0.739222	0.88
		Test 2	41	29	650	1	0.9	58.5714	99.8464	95.8391	0.738457	0.9
		Test 3	35	36	650	0	0.86	49.2958	100	95.0069	0.683439	0.86
		Test 4	34	28	659	0	0.94	54.8387	100	96.1165	0.725284	0.94
		Test 5	27	38	656	0	0.86	41.5385	100	94.7295	0.62661	0.86
		Avg	37.8	33.4	649.4	0.4	0.888	52.6671	99.9377	95.3121	0.702602	0.888
		SD	9.36483	4.5607	10.4785	0.547723	0.0334664	7.3494	0.0853458	0.623362	0.0481745	0.0334664
RARB
	Model Number		TP	FN	TN	FP	ROC-AUC	SE	SP	ACC	MCC	ROC-AUC
[100,100]	21	Train 1	113	62	2012	0	0.97	64.5714	100	97.1651	0.791462	0.97
	22	Train 2	165	21	2000	1	0.98	88.7097	99.95	98.9941	0.933833	0.98
0.2	23	Train 3	115	60	2011	1	0.97	65.7143	99.9503	97.2108	0.79496	0.97
0.001	24	Train 4	112	71	2004	0	0.99	61.2022	100	96.7535	0.768818	0.99
100	30	Train 5	159	26	2000	2	0.98	85.9459	99.9001	98.7197	0.914757	0.98
		Avg	132.8	48	2005.4	0.8	0.978	73.2287	99.9601	97.7686	0.840766	0.978
		SD	26.7619	22.8145	5.81378	0.83666	0.0083666	13.0138	0.041778	1.01391	0.0772039	0.0083666
		Validation 1	38	26	665	0	0.96	59.375	100	96.4335	0.755916	0.96
		Validation 2	46	7	676	0	0.96	86.7925	100	99.0398	0.926838	0.96
		Validation 3	44	16	669	0	0.98	73.3333	100	97.8052	0.846289	0.98
		Validation 4	22	35	672	0	0.97	38.5965	100	95.1989	0.605688	0.97
		Validation 5	48	6	675	0	0.98	88.8889	100	99.177	0.938647	0.98
		Avg	39.6	18	671.4	0	0.97	69.3972	100	97.5309	0.814675	0.97
		SD	10.5262	12.47	4.50555	0	0.01	20.8994	0	1.71056	0.13791	0.01
		Test 1	44	15	670	0	0.98	74.5763	100	97.9424	0.854068	0.98
		Test 2	48	11	669	1	0.97	81.3559	99.8507	98.3539	0.88451	0.97
		Test 3	43	20	665	1	0.98	68.254	99.8498	97.1193	0.803539	0.98
		Test 4	35	23	671	0	0.98	60.3448	100	96.845	0.763839	0.98
		Test 5	39	20	670	0	0.92	66.1017	100	97.2565	0.80116	0.92
		Avg	41.8	17.8	669	0.4	0.966	70.1265	99.9401	97.5034	0.821423	0.966
		SD	4.96991	4.76445	2.34521	0.547723	0.0260768	8.08219	0.0819957	0.624105	0.0476761	0.0260768
ROCK1
	Model Number		TP	FN	TN	FP	ROC-AUC	SE	SP	ACC	MCC	ROC-AUC
[100,100]	21	Train 1	753	18	640	35	0.99	97.6654	94.8148	96.3347	0.926513	0.99
	22	Train 2	751	20	653	22	0.99	97.406	96.7407	97.0954	0.941644	0.99
0.4	23	Train 3	777	11	623	35	0.99	98.6041	94.6809	96.8188	0.936192	0.99
0.001	24	Train 4	743	15	664	24	1	98.0211	96.5116	97.3029	0.945972	1
100	30	Train 5	791	15	621	19	1	98.139	97.0312	97.6487	0.95233	1
		Avg	763	15.8	640.2	27	0.994	97.9671	95.9559	97.0401	0.94053	0.994
		SD	20.1494	3.42053	18.6735	7.51665	0.00547723	0.45937	1.11904	0.497253	0.00981564	0.00547723
		Validation 1	232	8	223	19	0.99	96.6667	92.1488	94.3983	0.888912	0.99
		Validation 2	236	14	209	23	0.97	94.4	90.0862	92.3237	0.846637	0.97
		Validation 3	252	15	200	15	0.98	94.382	93.0233	93.7759	0.874053	0.98
		Validation 4	253	19	193	17	0.98	93.0147	91.9048	92.5311	0.848304	0.98
		Validation 5	231	18	220	13	0.98	92.7711	94.4206	93.5685	0.871504	0.98
		Avg	240.8	14.8	209	17.4	0.98	94.2469	92.3167	93.3195	0.865882	0.98
		SD	10.849	4.32435	12.7867	3.84708	0.00707107	1.54865	1.58892	0.87285	0.0180838	0.00707107
		Test 1	274	8	185	15	0.99	97.1631	92.5	95.2282	0.901625	0.99
		Test 2	261	11	188	22	0.98	95.9559	89.5238	93.1535	0.860869	0.98
		Test 3	227	11	227	17	0.98	95.3782	93.0328	94.1909	0.884109	0.98
		Test 4	249	14	204	15	0.98	94.6768	93.1507	93.9834	0.878618	0.98
		Test 5	223	15	230	14	0.98	93.6975	94.2623	93.9834	0.879651	0.98
		Avg	246.8	11.8	206.8	16.6	0.982	95.3743	92.4939	94.1079	0.880975	0.982
		SD	21.822	2.77489	21.1116	3.20936	0.00447214	1.30732	1.77978	0.742263	0.0145583	0.00447214
RPS6KA5
	Model Number		TP	FN	TN	FP	ROC-AUC	SE	SP	ACC	MCC	ROC-AUC
[100,100]	21	Train 1	87	38	631	0	0.99	69.6	100	94.9735	0.810226	0.99
	22	Train 2	109	28	619	0	0.99	79.562	100	96.2963	0.872461	0.99
0.3	23	Train 3	102	25	629	0	0.99	80.315	100	96.6931	0.87889	0.99
0.001	24	Train 4	103	32	621	0	0.99	76.2963	100	95.7672	0.851806	0.99
150	25	Train 5	132	11	613	0	1	92.3077	100	98.545	0.952263	1
		Avg	106.6	26.8	622.6	0	0.992	79.6162	100	96.455	0.873129	0.992
		SD	16.3493	10.0846	7.4027	0	0.00447214	8.26001	0	1.33395	0.0517379	0.00447214
		Validation 1	29	20	203	0	0.96	59.1837	100	92.0635	0.734001	0.96
		Validation 2	26	21	205	0	0.94	55.3191	100	91.6667	0.70837	0.94
		Validation 3	27	22	203	0	0.97	55.102	100	91.2698	0.705084	0.97
		Validation 4	26	18	208	0	0.94	59.0909	100	92.8571	0.737459	0.94
		Validation 5	29	11	211	1	0.97	72.5	99.5283	95.2381	0.812763	0.97
		Avg	27.4	18.4	206	0.2	0.956	60.2392	99.9057	92.619	0.739535	0.956
		SD	1.51658	4.39318	3.4641	0.447214	0.0151658	7.13017	0.21095	1.57735	0.043461	0.0151658
		Test 1	28	22	202	0	0.97	56	100	91.2698	0.710634	0.97
		Test 2	27	13	211	1	0.97	67.5	99.5283	94.4444	0.779387	0.97
		Test 3	31	17	204	0	0.95	64.5833	100	93.254	0.77211	0.95
		Test 4	21	24	207	0	0.95	46.6667	100	90.4762	0.64667	0.95
		Test 5	23	18	208	3	0.95	56.0976	98.5782	91.6667	0.663418	0.95
		Avg	26	18.8	206.4	0.8	0.958	58.1695	99.6213	92.2222	0.714444	0.958
		SD	4	4.32435	3.50714	1.30384	0.0109545	8.20838	0.617849	1.60211	0.060734	0.0109545
SIRT2
	Model Number		TP	FN	TN	FP	ROC-AUC	SE	SP	ACC	MCC	ROC-AUC
[100,100]	21	Train 1	164	45	770	8	0.97	78.4689	98.9717	94.6302	0.834044	0.97
	22	Train 2	185	42	750	10	0.98	81.4978	98.6842	94.7315	0.847455	0.98
0.3	23	Train 3	195	36	746	10	0.98	84.4156	98.6772	95.3394	0.867262	0.98
0.001	24	Train 4	167	53	762	5	0.99	75.9091	99.3481	94.1236	0.825684	0.99
150	25	Train 5	162	62	755	8	0.97	72.3214	98.9515	92.9078	0.790634	0.97
		Avg	174.6	47.6	756.6	8.2	0.978	78.5226	98.9266	94.3465	0.833016	0.978
		SD	14.6048	10.1143	9.58123	2.04939	0.0083666	4.71346	0.274434	0.912979	0.0284267	0.0083666
		Validation 1	47	12	266	4	0.96	79.661	98.5185	95.1368	0.828693	0.96
		Validation 2	43	21	258	7	0.93	67.1875	97.3585	91.4894	0.711697	0.93
		Validation 3	43	31	246	9	0.93	58.1081	96.4706	87.8419	0.624694	0.93
		Validation 4	37	28	261	3	0.91	56.9231	98.8636	90.5775	0.679689	0.91
		Validation 5	46	25	252	6	0.94	64.7887	97.6744	90.5775	0.704403	0.94
		Avg	43.2	23.4	256.6	5.8	0.934	65.3337	97.7771	91.1246	0.709835	0.934
		SD	3.89872	7.36885	7.79744	2.38747	0.0181659	9.10979	0.951711	2.62703	0.0746957	0.0181659
		Test 1	76	17	225	11	0.96	81.7204	95.339	91.4894	0.786785	0.96
		Test 2	34	36	252	7	0.89	48.5714	97.2973	86.9301	0.568365	0.89
		Test 3	28	28	266	7	0.88	50	97.4359	89.3617	0.578196	0.88
		Test 4	33	43	248	5	0.94	43.4211	98.0237	85.4103	0.54651	0.94
		Test 5	23	43	259	4	0.91	34.8485	98.4791	85.7143	0.48626	0.91
		Avg	38.8	33.4	250	6.8	0.916	51.7123	97.315	87.7812	0.593223	0.916
		SD	21.2532	11.0589	15.5724	2.68328	0.0336155	17.7934	1.20176	2.59162	0.113944	0.0336155
SIRT3
	Model Number		TP	FN	TN	FP	ROC-AUC	SE	SP	ACC	MCC	ROC-AUC
[100,100]	21	Train 1	60	20	651	4	0.97	75	99.3893	96.7347	0.821722	0.97
	22	Train 2	71	17	639	8	0.96	80.6818	98.7635	96.5986	0.832715	0.96
0.3	23	Train 3	85	21	621	8	0.97	80.1887	98.7281	96.0544	0.833948	0.97
0.001	24	Train 4	72	19	638	6	0.99	79.1209	99.0683	96.5986	0.836143	0.99
150	25	Train 5	80	18	629	8	0.97	81.6327	98.7441	96.4626	0.841627	0.97
		Avg	73.6	19	635.6	6.8	0.972	79.3248	98.9387	96.4898	0.833231	0.972
		SD	9.5551	1.58114	11.3049	1.78885	0.0109545	2.58164	0.288418	0.261706	0.00728374	0.0109545
		Validation 1	14	9	219	3	0.96	60.8696	98.6486	95.102	0.683122	0.96
		Validation 2	22	7	212	4	0.94	75.8621	98.1481	95.5102	0.776263	0.94
		Validation 3	22	8	213	2	0.93	73.3333	99.0698	95.9184	0.798427	0.93
		Validation 4	22	11	205	7	0.94	66.6667	96.6981	92.6531	0.669649	0.94
		Validation 5	21	5	213	6	0.97	80.7692	97.2603	95.5102	0.767463	0.97
		Avg	20.2	8	212.4	4.4	0.948	71.5002	97.965	94.9388	0.738985	0.948
		SD	3.49285	2.23607	4.97996	2.07364	0.0164317	7.82104	0.977634	1.30994	0.0584427	0.0164317
		Test 1	43	5	190	7	0.97	89.5833	96.4467	95.102	0.84723	0.97
		Test 2	29	5	209	2	0.96	85.2941	99.0521	97.1429	0.877119	0.96
		Test 3	11	4	226	4	0.92	73.3333	98.2609	96.7347	0.715942	0.92
		Test 4	12	15	217	1	0.87	44.4444	99.5413	93.4694	0.614478	0.87
		Test 5	17	10	217	1	0.92	62.963	99.5413	95.5102	0.750189	0.92
		Avg	22.4	7.8	211.8	3	0.928	71.1236	98.5685	95.5918	0.760992	0.928
		SD	13.5573	4.65833	13.5904	2.54951	0.0396232	18.199	1.29646	1.45457	0.105517	0.0396232
SRC
	Model Number		TP	FN	TN	FP	ROC-AUC	SE	SP	ACC	MCC	ROC-AUC
[100,100]	21	Train 1	1548	80	847	65	0.99	95.086	92.8728	94.2913	0.87649	0.99
	22	Train 2	1610	45	803	83	0.99	97.281	90.6321	94.9626	0.88847	0.99
0.4	23	Train 3	1615	42	803	81	0.99	97.4653	90.8371	95.1594	0.892727	0.99
0.001	24	Train 4	1555	44	851	91	0.98	97.2483	90.3397	94.6871	0.885662	0.98
100	25	Train 5	1527	89	864	61	0.99	94.4926	93.4054	94.0968	0.873572	0.99
		Avg	1571	60	833.6	76.2	0.988	96.3146	91.6174	94.6395	0.883384	0.988
		SD	39.3001	22.6164	28.6321	12.6965	0.00447214	1.41058	1.41291	0.445163	0.00809546	0.00447214
		Validation 1	485	44	286	32	0.97	91.6824	89.9371	91.0272	0.810463	0.97
		Validation 2	499	41	272	35	0.97	92.4074	88.5993	91.0272	0.80676	0.97
		Validation 3	515	32	251	49	0.96	94.1499	83.6667	90.4368	0.78903	0.96
		Validation 4	489	35	272	51	0.96	93.3206	84.2105	89.8465	0.783388	0.96
		Validation 5	473	47	302	25	0.97	90.9615	92.3547	91.4994	0.824096	0.97
		Avg	492.2	39.8	276.6	38.4	0.966	92.5044	87.7537	90.7674	0.802748	0.966
		SD	15.7861	6.22093	18.9156	11.2161	0.00547723	1.2688	3.73865	0.637981	0.0165405	0.00547723
		Test 1	495	51	261	40	0.96	90.6593	86.711	89.2562	0.767714	0.96
		Test 2	467	42	286	52	0.96	91.7485	84.6154	88.902	0.767688	0.96
		Test 3	470	30	296	51	0.96	94	85.3026	90.4368	0.801511	0.96
		Test 4	554	27	232	34	0.97	95.3528	87.218	92.7981	0.831797	0.97
		Test 5	519	49	251	28	0.97	91.3732	89.9642	90.9091	0.799304	0.97
		Avg	501	39.8	265.2	41	0.964	92.6268	86.7622	90.4604	0.793603	0.964
		SD	36.3524	10.895	25.9942	10.4881	0.00547723	1.97045	2.07378	1.54479	0.0269055	0.00547723
TACR2
	Model Number		TP	FN	TN	FP	ROC-AUC	SE	SP	ACC	MCC	ROC-AUC
[100,100]	21	Train 1	479	57	1135	3	0.98	89.3657	99.7364	96.4158	0.918078	0.98
	22	Train 2	449	75	1148	2	0.98	85.687	99.8261	95.4002	0.893811	0.98
0.5	23	Train 3	484	55	1131	4	0.98	89.7959	99.6476	96.4755	0.919579	0.98
0.001	24	Train 4	501	47	1119	7	0.98	91.4234	99.3783	96.7742	0.926771	0.98
100	25	Train 5	434	62	1176	2	0.98	87.5	99.8302	96.1768	0.908604	0.98
		Avg	469.4	59.2	1141.8	3.6	0.98	88.7544	99.6837	96.2485	0.913368	0.98
		SD	27.2635	10.3537	21.7417	2.07364	1.24127e-16	2.21156	0.186462	0.519748	0.0127039	1.24127e-16
		Validation 1	142	20	393	3	0.97	87.6543	99.2424	95.8781	0.899393	0.97
		Validation 2	142	22	392	2	0.97	86.5854	99.4924	95.6989	0.896148	0.97
		Validation 3	168	22	364	4	0.97	88.4211	98.913	95.3405	0.896245	0.97
		Validation 4	164	25	367	2	0.98	86.7725	99.458	95.1613	0.892705	0.98
		Validation 5	128	28	397	5	0.95	82.0513	98.7562	94.086	0.851151	0.95
		Avg	148.8	23.4	382.6	3.2	0.968	86.2969	99.1724	95.233	0.887128	0.968
		SD	16.769	3.1305	15.7575	1.30384	0.0109545	2.48442	0.327617	0.70099	0.0202505	0.0109545
		Test 1	152	26	374	6	0.97	85.3933	98.4211	94.2652	0.867085	0.97
		Test 2	158	30	370	0	0.97	84.0426	100	94.6237	0.881699	0.97
		Test 3	122	25	411	0	0.97	82.9932	100	95.5197	0.884502	0.97
		Test 4	115	24	415	4	0.96	82.7338	99.0453	94.9821	0.863478	0.96
		Test 5	202	22	331	3	0.98	90.1786	99.1018	95.5197	0.907797	0.98
		Avg	149.8	25.4	380.2	2.6	0.97	85.0683	99.3136	94.9821	0.880912	0.97
		SD	34.5717	2.96648	34.3613	2.60768	0.00707107	3.04255	0.68113	0.552367	0.0175462	0.00707107
TBXA2R
	Model Number		TP	FN	TN	FP	ROC-AUC	SE	SP	ACC	MCC	ROC-AUC
[100,100]	21	Train 1	547	40	1121	35	0.98	93.1857	96.9723	95.6971	0.903493	0.98
	22	Train 2	567	37	1103	36	0.98	93.8742	96.8393	95.8118	0.907489	0.98
0.5	23	Train 3	571	36	1106	30	0.99	94.0692	97.3592	96.2134	0.916419	0.99
0.001	24	Train 4	579	53	1094	17	0.99	91.6139	98.4698	95.9839	0.912972	0.99
100	25	Train 5	556	40	1118	29	0.99	93.2886	97.4717	96.0413	0.911734	0.99
		Avg	564	41.2	1108.4	29.4	0.986	93.2063	97.4225	95.9495	0.910421	0.986
		SD	12.6095	6.83374	11.1041	7.56968	0.00547723	0.966113	0.641505	0.201213	0.00502012	0.00547723
		Validation 1	190	12	359	20	0.97	94.0594	94.723	94.4923	0.880087	0.97
		Validation 2	192	16	353	20	0.97	92.3077	94.6381	93.8038	0.865871	0.97
		Validation 3	183	21	357	20	0.97	89.7059	94.695	92.9432	0.844965	0.97
		Validation 4	166	26	380	9	0.96	86.4583	97.6864	93.9759	0.862721	0.96
		Validation 5	162	14	394	11	0.98	92.0455	97.284	95.6971	0.897687	0.98
		Avg	178.6	17.8	368.6	16	0.97	90.9154	95.8053	94.1824	0.870266	0.97
		SD	13.813	5.6745	17.6437	5.52268	0.00707107	2.9338	1.54042	1.01388	0.0197786	0.00707107
		Test 1	189	24	355	13	0.98	88.7324	96.4674	93.6317	0.862099	0.98
		Test 2	173	17	381	10	0.98	91.0526	97.4425	95.3528	0.893752	0.98
		Test 3	182	9	364	26	0.98	95.288	93.3333	93.9759	0.868362	0.98
		Test 4	155	23	390	13	0.97	87.0787	96.7742	93.8038	0.85261	0.97
		Test 5	207	23	337	14	0.96	90	96.0114	93.6317	0.866415	0.96
		Avg	181.2	19.2	365.4	15.2	0.974	90.4303	96.0058	94.0792	0.868648	0.974
		SD	19.2406	6.34035	21.0071	6.22093	0.00894427	3.09377	1.5819	0.726163	0.0152921	0.00894427
TEK
	Model Number		TP	FN	TN	FP	ROC-AUC	SE	SP	ACC	MCC	ROC-AUC
[100,100]	21	Train 1	438	20	680	14	0.99	95.6332	97.9827	97.0486	0.938305	0.99
	22	Train 2	428	20	681	23	0.99	95.5357	96.733	96.2674	0.921578	0.99
0.5	23	Train 3	461	10	660	21	0.99	97.8769	96.9163	97.309	0.944713	0.99
0.001	24	Train 4	468	24	648	12	0.99	95.122	98.1818	96.875	0.936156	0.99
100	25	Train 5	471	19	652	10	0.99	96.1224	98.4894	97.4826	0.948503	0.99
		Avg	453.2	18.6	664.2	16	0.99	96.058	97.6606	96.9965	0.937851	0.99
		SD	19.1233	5.17687	15.4984	5.70088	0	1.07725	0.786906	0.469874	0.0103494	0
		Validation 1	151	12	212	9	0.98	92.638	95.9276	94.5312	0.887915	0.98
		Validation 2	158	8	212	6	0.99	95.1807	97.2477	96.3542	0.925667	0.99
		Validation 3	149	11	212	12	0.96	93.125	94.6429	94.0104	0.876908	0.96
		Validation 4	129	12	237	6	0.98	91.4894	97.5309	95.3125	0.898742	0.98
		Validation 5	150	13	215	6	0.98	92.0245	97.2851	95.0521	0.89879	0.98
		Avg	147.4	11.2	217.6	7.8	0.978	92.8915	96.5268	95.0521	0.897604	0.978
		SD	10.8766	1.92354	10.9225	2.68328	0.0109545	1.421	1.22588	0.883116	0.0181136	0.0109545
		Test 1	156	11	216	1	0.97	93.4132	99.5392	96.875	0.937315	0.97
		Test 2	161	13	204	6	0.98	92.5287	97.1429	95.0521	0.900432	0.98
		Test 3	146	11	219	8	0.98	92.9936	96.4758	95.0521	0.897456	0.98
		Test 4	145	10	216	13	0.99	93.5484	94.3231	94.0104	0.876091	0.99
		Test 5	126	9	236	13	0.97	93.3333	94.7791	94.2708	0.875414	0.97
		Avg	146.8	10.8	218.2	8.2	0.978	93.1635	96.452	95.0521	0.897342	0.978
		SD	13.4425	1.48324	11.4978	5.06952	0.0083666	0.409603	2.08201	1.12009	0.0251987	0.0083666

## Sheet: 1000,1000
ADRA2A
	Model Number		TP	FN	TN	FP	ROC-AUC	SE	SP	ACC	MCC	ROC-AUC
[1000,1000]	26	Train 1	495	25	584	9	0.99	95.1923	98.4823	96.9452	0.938916	0.99
	27	Train 2	494	15	595	9	0.99	97.053	98.5099	97.8437	0.956573	0.99
0.4	28	Train 3	466	30	613	4	0.99	93.9516	99.3517	96.9452	0.938915	0.99
0.001	29	Train 4	453	24	629	7	0.99	94.9686	98.8994	97.2147	0.943343	0.99
100	30	Train 5	465	20	616	12	0.99	95.8763	98.0892	97.1249	0.941524	0.99
		Avg	474.6	22.8	607.4	8.2	0.99	95.4084	98.6665	97.2147	0.943854	0.99
		SD	18.8759	5.63028	17.841	2.94958	0	1.14958	0.478404	0.37045	0.00735261	0
		Validation 1	153	21	183	14	0.96	87.931	92.8934	90.566	0.810732	0.96
		Validation 2	165	19	174	13	0.97	89.6739	93.0481	91.3747	0.82787	0.97
		Validation 3	156	20	184	11	0.96	88.6364	94.359	91.6442	0.833017	0.96
		Validation 4	153	23	182	13	0.96	86.9318	93.3333	90.2965	0.806064	0.96
		Validation 5	154	17	187	13	0.97	90.0585	93.5	91.9137	0.837202	0.97
		Avg	156.2	20	182	12.8	0.964	88.6463	93.4268	91.159	0.822977	0.964
		SD	5.06952	2.23607	4.84768	1.09545	0.00547723	1.27489	0.572484	0.697692	0.0138121	0.00547723
		Test 1	138	10	206	17	0.97	93.2432	92.3767	92.7224	0.850091	0.97
		Test 2	128	21	205	17	0.94	85.906	92.3423	89.7574	0.786152	0.94
		Test 3	141	29	188	13	0.96	82.9412	93.5323	88.6792	0.773292	0.96
		Test 4	173	16	171	11	0.97	91.5344	93.956	92.7224	0.85478	0.97
		Test 5	164	22	178	7	0.97	88.172	96.2162	92.1833	0.846469	0.97
		Avg	148.8	19.6	189.6	13	0.962	88.3594	93.6847	91.2129	0.822157	0.962
		SD	18.8865	7.09225	15.7258	4.24264	0.0130384	4.16364	1.58258	1.87327	0.0391147	0.0130384
ADRB1
	Model Number		TP	FN	TN	FP	ROC-AUC	SE	SP	ACC	MCC	ROC-AUC
[1000,1000]	26	Train 1	732	30	601	41	0.99	96.063	93.6137	94.943	0.898091	0.99
	27	Train 2	774	26	562	42	0.99	96.75	93.0464	95.1567	0.901132	0.99
0.4	28	Train 3	714	26	617	47	0.99	96.4865	92.9217	94.8006	0.895941	0.99
0.001	29	Train 4	717	30	623	34	0.99	95.9839	94.825	95.4416	0.908437	0.99
100	30	Train 5	719	37	606	42	0.98	95.1058	93.5185	94.3732	0.886755	0.98
		Avg	731.2	29.8	601.8	41.2	0.988	96.0778	93.585	94.943	0.898071	0.988
		SD	24.8938	4.49444	23.8893	4.65833	0.00447214	0.627027	0.753802	0.39975	0.00789647	0.00447214
		Validation 1	219	22	204	23	0.95	90.8714	89.8678	90.3846	0.807503	0.95
		Validation 2	228	18	204	18	0.97	92.6829	91.8919	92.3077	0.845748	0.97
		Validation 3	231	14	207	16	0.97	94.2857	92.8251	93.5897	0.871491	0.97
		Validation 4	232	22	195	19	0.96	91.3386	91.1215	91.2393	0.82376	0.96
		Validation 5	227	22	196	23	0.96	91.1647	89.4977	90.3846	0.806853	0.96
		Avg	227.4	19.6	201.2	19.8	0.962	92.0687	91.0408	91.5812	0.831071	0.962
		SD	5.12835	3.57771	5.35724	3.11448	0.0083666	1.42095	1.38488	1.37319	0.0275891	0.0083666
		Test 1	234	23	194	17	0.96	91.0506	91.9431	91.453	0.828107	0.96
		Test 2	196	18	231	23	0.96	91.5888	90.9449	91.2393	0.824011	0.96
		Test 3	251	24	176	17	0.97	91.2727	91.1917	91.2393	0.820596	0.97
		Test 4	244	15	192	17	0.97	94.2085	91.866	93.1624	0.861573	0.97
		Test 5	241	14	195	18	0.97	94.5098	91.5493	93.1624	0.862052	0.97
		Avg	233.2	18.8	197.6	18.4	0.966	92.5261	91.499	92.0513	0.839268	0.966
		SD	21.6726	4.54973	20.2064	2.60768	0.00547723	1.68762	0.428942	1.01805	0.0207524	0.00547723
ADRB2
	Model Number		TP	FN	TN	FP	ROC-AUC	SE	SP	ACC	MCC	ROC-AUC
[1000,1000]	26	Train 1	800	361	1174	38	0.95	68.9061	96.8647	83.1858	0.687898	0.95
	27	Train 2	953	220	1109	91	0.94	81.2447	92.4167	86.8942	0.741936	0.94
0.4	28	Train 3	853	333	1139	48	0.95	71.9224	95.9562	83.9444	0.699334	0.95
0.001	29	Train 4	904	281	1141	47	0.95	76.2869	96.0438	86.1778	0.737989	0.95
50	30	Train 5	879	263	1179	52	0.95	76.9702	95.7758	86.7257	0.744413	0.95
		Avg	877.8	291.6	1148.4	55.2	0.948	75.0661	95.4114	85.3856	0.722314	0.948
		SD	57.0324	56.0963	28.6671	20.6567	0.00447214	4.77281	1.72554	1.70407	0.0266065	0.00447214
		Validation 1	252	141	377	21	0.88	64.1221	94.7236	79.5196	0.61888	0.88
		Validation 2	284	96	362	49	0.89	74.7368	88.0779	81.6688	0.635652	0.89
		Validation 3	247	136	384	24	0.87	64.4909	94.1176	79.7724	0.617169	0.87
		Validation 4	272	129	361	29	0.89	67.8304	92.5641	80.0253	0.6219	0.89
		Validation 5	267	101	380	43	0.89	72.5543	89.8345	81.7952	0.637452	0.89
		Avg	264.4	120.6	372.8	33.2	0.884	68.7469	91.8635	80.5563	0.626211	0.884
		SD	15.0433	20.6954	10.616	12.2147	0.00894427	4.76231	2.83726	1.08899	0.00961222	0.00894427
		Test 1	269	120	378	24	0.9	69.1517	94.0299	81.7952	0.654078	0.9
		Test 2	298	92	350	51	0.89	76.4103	87.2818	81.9216	0.641307	0.89
		Test 3	237	137	400	17	0.87	63.369	95.9233	80.531	0.634012	0.87
		Test 4	211	146	407	27	0.86	59.1036	93.7788	78.129	0.573772	0.86
		Test 5	303	130	326	32	0.88	69.9769	91.0615	79.5196	0.61487	0.88
		Avg	263.6	125	372.2	30.2	0.88	67.6023	92.415	80.3793	0.623608	0.88
		SD	39.4943	20.7605	34.0764	12.8335	0.0158114	6.62887	3.35252	1.59763	0.0312645	0.0158114
OPRD1
	Model Number		TP	FN	TN	FP	ROC-AUC	SE	SP	ACC	MCC	ROC-AUC
[1000,1000]	26	Train 1	1785	33	646	71	0.99	98.1848	90.0976	95.8974	0.897857	0.99
	27	Train 2	1742	32	682	79	0.99	98.1962	89.6189	95.6213	0.894817	0.99
0.4	28	Train 3	1782	31	670	52	0.99	98.2901	92.7978	96.7258	0.919114	0.99
0.001	29	Train 4	1778	36	673	48	0.99	98.0154	93.3426	96.6864	0.918247	0.99
100	30	Train 5	1757	28	668	82	0.99	98.4314	89.0667	95.6607	0.894855	0.99
		Avg	1768.8	32	667.8	66.4	0.99	98.2236	90.9847	96.1183	0.904978	0.99
		SD	18.5661	2.91548	13.3116	15.566	0	0.152631	1.94795	0.547031	0.0125732	0
		Validation 1	606	14	183	42	0.97	97.7419	81.3333	93.3728	0.826622	0.97
		Validation 2	602	23	179	41	0.98	96.32	81.3636	92.426	0.799281	0.98
		Validation 3	554	27	228	36	0.98	95.3528	86.3636	92.5444	0.825094	0.98
		Validation 4	579	31	202	33	0.97	94.918	85.9574	92.426	0.81089	0.97
		Validation 5	558	26	225	36	0.97	95.5479	86.2069	92.6627	0.826628	0.97
		Avg	579.8	24.2	203.4	37.6	0.974	95.9762	84.245	92.6864	0.817703	0.974
		SD	24.0873	6.37966	22.832	3.78153	0.00547723	1.10992	2.64812	0.396052	0.0122435	0.00547723
		Test 1	550	18	231	46	0.98	96.831	83.3935	92.426	0.826035	0.98
		Test 2	597	10	181	57	0.95	98.3526	76.0504	92.071	0.800143	0.95
		Test 3	577	35	215	18	0.97	94.281	92.2747	93.7278	0.847463	0.97
		Test 4	555	27	213	50	0.96	95.3608	80.9886	90.8876	0.783902	0.96
		Test 5	619	18	162	46	0.97	97.1743	77.8846	92.426	0.789689	0.97
		Avg	579.6	21.6	200.4	43.4	0.966	96.3999	82.1184	92.3077	0.809446	0.966
		SD	28.9102	9.60729	28.1034	14.893	0.0114018	1.59433	6.3403	1.01458	0.0266921	0.0114018
DRD1
	Model Number		TP	FN	TN	FP	ROC-AUC	SE	SP	ACC	MCC	ROC-AUC
[1000,1000]	26	Train 1	700	126	1148	30	0.97	84.7458	97.4533	92.2156	0.840782	0.97
	27	Train 2	644	149	1186	25	0.97	81.2106	97.9356	91.3174	0.820701	0.97
0.4	28	Train 3	668	131	1180	25	0.97	83.6045	97.9253	92.2156	0.839297	0.97
0.001	29	Train 4	683	112	1178	31	0.97	85.9119	97.4359	92.8643	0.851426	0.97
50	30	Train 5	703	133	1135	33	0.97	84.0909	97.1747	91.7166	0.831252	0.97
		Avg	679.6	130.2	1165.4	28.8	0.97	83.9127	97.585	92.0659	0.836692	0.97
		SD	24.3783	13.3304	22.49	3.63318	0	1.74063	0.334171	0.584067	0.0114665	0
		Validation 1	217	49	383	19	0.94	81.5789	95.2736	89.8204	0.787072	0.94
		Validation 2	211	61	380	16	0.94	77.5735	95.9596	88.4731	0.762751	0.94
		Validation 3	203	67	384	14	0.94	75.1852	96.4824	87.8743	0.75098	0.94
		Validation 4	227	43	381	17	0.95	84.0741	95.7286	91.018	0.813323	0.95
		Validation 5	213	60	376	19	0.94	78.022	95.1899	88.1737	0.755917	0.94
		Avg	214.2	56	380.8	17	0.942	79.2867	95.7268	89.0719	0.774009	0.942
		SD	8.78635	9.74679	3.11448	2.12132	0.00447214	3.51889	0.528866	1.31788	0.025984	0.00447214
		Test 1	210	48	374	36	0.93	81.3953	91.2195	87.4251	0.732999	0.93
		Test 2	227	58	366	17	0.93	79.6491	95.5614	88.7725	0.772542	0.93
		Test 3	204	77	376	11	0.93	72.5979	97.1576	86.8263	0.737087	0.93
		Test 4	217	68	356	27	0.92	76.1404	92.9504	85.7784	0.709682	0.92
		Test 5	202	39	398	29	0.95	83.8174	93.2084	89.8204	0.7777	0.95
		Avg	212	58	374	24	0.932	78.72	94.0195	87.7246	0.746002	0.932
		SD	10.2225	15.1822	15.5563	9.94987	0.0109545	4.41983	2.33805	1.59486	0.028622	0.0109545
DRD2
	Model Number		TP	FN	TN	FP	ROC-AUC	SE	SP	ACC	MCC	ROC-AUC
[1000,1000]	26	Train 1	3439	27	551	81	0.99	99.221	87.1835	97.3646	0.896549	0.99
	27	Train 2	3371	28	644	55	1	99.1762	92.1316	97.9746	0.927564	1
0.3	28	Train 3	3371	42	634	51	0.99	98.7694	92.5547	97.7306	0.918091	0.99
0.001	29	Train 4	3365	28	634	71	0.99	99.1748	89.9291	97.5842	0.91375	0.99
100	30	Train 5	3374	31	635	58	0.99	99.0896	91.6306	97.8282	0.921761	0.99
		Avg	3384	31.2	619.6	63.2	0.992	99.0862	90.6859	97.6964	0.915543	0.992
		SD	30.9192	6.22093	38.5785	12.4579	0.00447214	0.183364	2.19741	0.233803	0.0117648	0.00447214
		Validation 1	1131	13	179	43	0.98	98.8636	80.6306	95.9004	0.843802	0.98
		Validation 2	1154	12	165	35	0.98	98.9708	82.5	96.5593	0.857608	0.98
		Validation 3	1097	24	201	44	0.98	97.8591	82.0408	95.022	0.826414	0.98
		Validation 4	1112	14	203	37	0.98	98.7567	84.5833	96.2665	0.867638	0.98
		Validation 5	1114	29	194	29	0.98	97.4628	86.9955	95.754	0.844583	0.98
		Avg	1121.6	18.4	188.4	37.6	0.98	98.3826	83.3501	95.9004	0.848009	0.98
		SD	21.7555	7.63544	16.1183	6.14817	1.24127e-16	0.677762	2.48205	0.583359	0.015598	1.24127e-16
		Test 1	1077	7	217	65	0.98	99.3542	76.9504	94.7291	0.834128	0.98
		Test 2	1104	25	191	46	0.95	97.7857	80.5907	94.8023	0.813449	0.95
		Test 3	1130	30	183	23	0.98	97.4138	88.835	96.1201	0.850768	0.98
		Test 4	1162	13	154	37	0.97	98.8936	80.6283	96.3397	0.841888	0.97
		Test 5	1126	20	185	35	0.97	98.2548	84.0909	95.9736	0.847523	0.97
		Avg	1119.8	19	186	41.2	0.97	98.3404	82.219	95.593	0.837551	0.97
		SD	31.6417	9.19239	22.4722	15.6269	0.0122474	0.79177	4.47815	0.766748	0.014879	0.0122474
SLC6A3
	Model Number		TP	FN	TN	FP	ROC-AUC	SE	SP	ACC	MCC	ROC-AUC
[1000,1000]	26	Train 1	1409	83	1132	31	0.99	94.437	97.3345	95.7062	0.913929	0.99
	27	Train 2	1463	61	1093	38	0.99	95.9974	96.6401	96.2712	0.924097	0.99
0.4	28	Train 3	1478	35	1035	107	0.99	97.6867	90.6305	94.6516	0.891438	0.99
0.001	29	Train 4	1401	99	1139	16	0.99	93.4	98.6147	95.6685	0.914426	0.99
100	30	Train 5	1423	91	1107	34	0.98	93.9894	97.0202	95.2919	0.905388	0.98
		Avg	1434.8	73.8	1101.2	45.2	0.988	95.1021	96.048	95.5179	0.909856	0.988
		SD	33.9441	25.9075	41.415	35.5345	0.00447214	1.73632	3.11803	0.597316	0.0122419	0.00447214
		Validation 1	447	49	373	16	0.97	90.121	95.8869	92.6554	0.854687	0.97
		Validation 2	471	38	341	35	0.96	92.5344	90.6915	91.7514	0.831412	0.96
		Validation 3	476	21	327	61	0.97	95.7746	84.2784	90.7345	0.813195	0.97
		Validation 4	441	57	366	21	0.95	88.5542	94.5736	91.1864	0.825516	0.95
		Validation 5	465	28	368	24	0.98	94.3205	93.8776	94.1243	0.881096	0.98
		Avg	460	38.6	355	31.4	0.966	92.2609	91.8616	92.0904	0.841181	0.966
		SD	15.2643	14.7411	19.9625	17.9527	0.0114018	2.95728	4.65019	1.34411	0.0269242	0.0114018
		Test 1	470	51	338	26	0.96	90.2111	92.8571	91.2994	0.823548	0.96
		Test 2	429	47	380	29	0.96	90.1261	92.9095	91.4124	0.828481	0.96
		Test 3	477	22	312	74	0.96	95.5912	80.829	89.1525	0.781813	0.96
		Test 4	467	44	357	17	0.98	91.3894	95.4545	93.1073	0.861769	0.98
		Test 5	462	40	351	32	0.97	92.0319	91.6449	91.8644	0.834842	0.97
		Avg	461	40.8	347.6	35.6	0.966	91.8699	90.739	91.3672	0.826091	0.966
		SD	18.6949	11.2561	25.046	22.1878	0.00894427	2.23033	5.71101	1.43062	0.0288194	0.00894427
EDNRA
	Model Number		TP	FN	TN	FP	ROC-AUC	SE	SP	ACC	MCC	ROC-AUC
[1000,1000]	26	Train 1	744	16	683	18	0.99	97.8947	97.4322	97.6728	0.953379	0.99
	27	Train 2	774	13	648	26	1	98.3482	96.1424	97.3306	0.946368	1
0.4	28	Train 3	722	7	653	29	1	99.0398	95.7478	97.4486	0.949326	1
0.001	29	Train 4	736	10	690	25	0.99	98.6595	96.5035	97.6044	0.952246	0.99
100	30	Train 5	729	11	700	21	0.99	98.5135	97.0874	97.8097	0.956269	0.99
		Avg	741	11.4	674.8	23.8	0.994	98.4911	96.5827	97.5732	0.951518	0.994
		SD	20.1742	3.36155	23.0586	4.32435	0.00547723	0.420119	0.684394	0.187894	0.00380421	0.00547723
		Validation 1	255	13	208	11	0.97	95.1493	94.9772	95.0719	0.900543	0.97
		Validation 2	273	4	199	11	0.99	98.556	94.7619	96.9199	0.937362	0.99
		Validation 3	242	12	222	11	0.97	95.2756	95.279	95.2772	0.905393	0.97
		Validation 4	250	7	217	13	0.98	97.2763	94.3478	95.8932	0.917779	0.98
		Validation 5	266	6	204	11	0.99	97.7941	94.8837	96.5092	0.929245	0.99
		Avg	257.2	8.4	210	11.4	0.98	96.8102	94.8499	95.9343	0.918064	0.98
		SD	12.3976	3.91152	9.40744	0.894427	0.01	1.52862	0.339582	0.787281	0.0155324	0.01
		Test 1	250	7	221	9	0.98	97.2763	96.087	96.7146	0.934091	0.98
		Test 2	215	6	257	9	0.98	97.2851	96.6165	96.9199	0.938011	0.98
		Test 3	248	4	221	14	0.98	98.4127	94.0426	96.3039	0.926667	0.98
		Test 4	266	16	194	11	0.95	94.3262	94.6341	94.4559	0.886847	0.95
		Test 5	259	14	202	12	0.94	94.8718	94.3925	94.6612	0.891774	0.94
		Avg	247.6	9.4	219	11	0.966	96.4344	95.1545	95.8111	0.915478	0.966
		SD	19.6036	5.27257	24.3208	2.12132	0.0194936	1.74872	1.12859	1.167	0.0242952	0.0194936
NR3C1
	Model Number		TP	FN	TN	FP	ROC-AUC	SE	SP	ACC	MCC	ROC-AUC
[1000,1000]	26	Train 1	1225	552	4205	12	0.94	68.9364	99.7154	90.5906	0.774723	0.94
	27	Train 2	1348	447	4170	29	0.94	75.0975	99.3094	92.0587	0.810161	0.94
0.4	28	Train 3	1424	416	4118	36	0.94	77.3913	99.1334	92.4591	0.822293	0.94
0.001	29	Train 4	1367	428	4169	30	0.94	76.156	99.2855	92.359	0.817298	0.94
100	30	Train 5	1417	431	4096	50	0.93	76.6775	98.794	91.9753	0.810641	0.93
		Avg	1356.2	454.8	4151.6	31.4	0.938	74.8517	99.2475	91.8886	0.807023	0.938
		SD	80.1417	55.45	43.9124	13.704	0.00447214	3.41084	0.332758	0.753009	0.0187415	0.00447214
		Validation 1	366	219	1407	6	0.88	62.5641	99.5754	88.7387	0.726415	0.88
		Validation 2	432	176	1373	17	0.89	71.0526	98.777	90.3403	0.76975	0.89
		Validation 3	445	160	1357	36	0.9	73.5537	97.4156	90.1902	0.762709	0.9
		Validation 4	427	183	1355	33	0.88	70	97.6225	89.1892	0.739765	0.88
		Validation 5	434	175	1357	32	0.89	71.2644	97.6962	89.6396	0.750651	0.89
		Avg	420.8	182.6	1369.8	24.8	0.888	69.687	98.2173	89.6196	0.749858	0.888
		SD	31.3321	22.0068	22.0273	12.8335	0.0083666	4.18743	0.925421	0.672051	0.0174136	0.0083666
		Test 1	436	220	1337	5	0.9	66.4634	99.6274	88.7387	0.748352	0.9
		Test 2	438	177	1367	16	0.9	71.2195	98.8431	90.3403	0.771762	0.9
		Test 3	385	188	1399	26	0.87	67.1902	98.1754	89.2893	0.73135	0.87
		Test 4	425	188	1374	11	0.91	69.3312	99.2058	90.04	0.765237	0.91
		Test 5	415	146	1398	39	0.89	73.975	97.286	90.7407	0.764206	0.89
		Avg	419.8	183.8	1375	19.4	0.894	69.6359	98.6275	89.8298	0.756181	0.894
		SD	21.5337	26.5556	25.5636	13.3903	0.0151658	3.06084	0.919874	0.808893	0.0163331	0.0151658
HRH1
	Model Number		TP	FN	TN	FP	ROC-AUC	SE	SP	ACC	MCC	ROC-AUC
[1000,1000]	26	Train 1	728	19	654	27	0.99	97.4565	96.0352	96.7787	0.935462	0.99
	27	Train 2	751	20	633	24	0.99	97.406	96.347	96.9188	0.937967	0.99
0.4	28	Train 3	723	25	658	22	0.99	96.6578	96.7647	96.7087	0.934046	0.99
0.001	29	Train 4	768	18	616	26	0.99	97.7099	95.9502	96.9188	0.937731	0.99
100	30	Train 5	752	14	621	41	1	98.1723	93.8066	96.1485	0.923014	1
		Avg	744.4	19.2	636.4	28	0.992	97.4805	95.7808	96.6947	0.933644	0.992
		SD	18.6091	3.96232	18.9816	7.51665	0.00447214	0.550976	1.14885	0.318608	0.00616137	0.00447214
		Validation 1	243	13	199	21	0.97	94.9219	90.4545	92.8571	0.856445	0.97
		Validation 2	235	13	203	25	0.98	94.7581	89.0351	92.0168	0.840791	0.98
		Validation 3	237	12	215	12	0.99	95.1807	94.7137	94.958	0.898944	0.99
		Validation 4	234	21	197	24	0.97	91.7647	89.1403	90.5462	0.809848	0.97
		Validation 5	266	8	189	13	0.99	97.0803	93.5644	95.5882	0.909616	0.99
		Avg	243	13.4	200.6	19	0.98	94.7411	91.3816	93.1933	0.863129	0.98
		SD	13.3229	4.72229	9.5289	6.12372	0.01	1.90768	2.61037	2.08291	0.0413106	0.01
		Test 1	254	18	167	37	0.96	93.3824	81.8627	88.4454	0.763916	0.96
		Test 2	240	16	209	11	0.98	93.75	95	94.3277	0.886281	0.98
		Test 3	260	18	182	16	0.97	93.5252	91.9192	92.8571	0.853235	0.97
		Test 4	217	17	221	21	0.97	92.735	91.3223	92.0168	0.840455	0.97
		Test 5	222	13	214	27	0.96	94.4681	88.7967	91.5966	0.833472	0.96
		Avg	238.6	16.4	198.6	22.4	0.968	93.5721	89.7802	91.8487	0.835472	0.968
		SD	18.9684	2.07364	23.0282	10.0896	0.0083666	0.627158	4.94604	2.17008	0.0448505	0.0083666
OPRM1
	Model Number		TP	FN	TN	FP	ROC-AUC	SE	SP	ACC	MCC	ROC-AUC
[1000,1000]	26	Train 1	2087	62	1364	36	0.99	97.1149	97.4286	97.2387	0.942495	0.99
	27	Train 2	2092	48	1340	69	0.99	97.757	95.1029	96.7033	0.93104	0.99
0.4	28	Train 3	2100	60	1356	33	0.99	97.2222	97.6242	97.3795	0.945305	0.99
0.001	29	Train 4	2168	44	1260	77	0.99	98.0108	94.2408	96.5906	0.927226	0.99
100	30	Train 5	2118	49	1308	74	0.99	97.7388	94.6454	96.5342	0.926982	0.99
		Avg	2113	52.6	1325.6	57.8	0.99	97.5688	95.8084	96.8893	0.93461	0.99
		SD	32.9242	7.92465	42.4829	21.4872	0	0.382701	1.59918	0.391244	0.00868921	0
		Validation 1	708	31	413	31	0.98	95.8051	93.018	94.7591	0.888232	0.98
		Validation 2	711	25	406	41	0.98	96.6033	90.8277	94.421	0.880867	0.98
		Validation 3	656	45	436	46	0.97	93.5806	90.4564	92.3077	0.840644	0.97
		Validation 4	690	25	419	49	0.98	96.5035	89.5299	93.7447	0.868819	0.98
		Validation 5	697	24	412	50	0.98	96.6713	89.1775	93.7447	0.868199	0.98
		Avg	692.4	30	417.2	43.4	0.978	95.8328	90.6019	93.7954	0.869352	0.978
		SD	22.0295	8.83176	11.4761	7.76531	0.00447214	1.30573	1.50731	0.940536	0.0181301	0.00447214
		Test 1	680	42	425	36	0.97	94.1828	92.1909	93.4066	0.861759	0.97
		Test 2	694	40	413	36	0.98	94.5504	91.9822	93.5757	0.863854	0.98
		Test 3	717	32	391	43	0.98	95.7276	90.0922	93.6602	0.862971	0.98
		Test 4	659	24	447	53	0.98	96.4861	89.4	93.4911	0.866698	0.98
		Test 5	685	37	424	37	0.98	94.8753	91.974	93.7447	0.868493	0.98
		Avg	687	35	420	41	0.978	95.1645	91.1278	93.5757	0.864755	0.978
		SD	21.1305	7.2111	20.3715	7.31437	0.00447214	0.933827	1.28782	0.133655	0.00277127	0.00447214
CHRM1
	Model Number		TP	FN	TN	FP	ROC-AUC	SE	SP	ACC	MCC	ROC-AUC
[1000,1000]	26	Train 1	1210	19	678	46	0.99	98.454	93.6464	96.6718	0.928529	0.99
	27	Train 2	1224	17	643	69	0.99	98.6301	90.309	95.5965	0.904998	0.99
0.4	28	Train 3	1182	17	717	37	1	98.5822	95.0928	97.235	0.941606	1
0.001	29	Train 4	1145	30	739	39	0.99	97.4468	94.9871	96.467	0.926192	0.99
100	30	Train 5	1153	28	720	52	0.99	97.6291	93.2642	95.9037	0.914159	0.99
		Avg	1182.8	22.2	699.4	48.6	0.992	98.1485	93.4599	96.3748	0.923097	0.992
		SD	34.4775	6.30079	38.5396	12.8569	0.00447214	0.564689	1.93651	0.645039	0.0140458	0.00447214
		Validation 1	397	20	207	27	0.96	95.2038	88.4615	92.7803	0.842415	0.96
		Validation 2	396	12	202	41	0.96	97.0588	83.1276	91.8587	0.825632	0.96
		Validation 3	367	27	223	34	0.96	93.1472	86.7704	90.6298	0.803184	0.96
		Validation 4	383	23	218	27	0.97	94.335	88.9796	92.3195	0.835924	0.97
		Validation 5	387	19	216	29	0.97	95.3202	88.1633	92.6267	0.842104	0.97
		Avg	386	20.2	213.2	31.6	0.964	95.013	87.1005	92.043	0.829852	0.964
		SD	12.1655	5.54076	8.52643	5.98331	0.00547723	1.43676	2.36675	0.864866	0.0163844	0.00547723
		Test 1	348	20	249	34	0.96	94.5652	87.9859	91.7051	0.831059	0.96
		Test 2	349	16	241	45	0.96	95.6164	84.2657	90.6298	0.811082	0.96
		Test 3	401	20	189	41	0.94	95.2494	82.1739	90.6298	0.79267	0.94
		Test 4	415	18	195	23	0.98	95.843	89.4495	93.702	0.857939	0.98
		Test 5	404	23	199	25	0.97	94.6136	88.8393	92.6267	0.836323	0.97
		Avg	383.4	19.4	214.6	33.6	0.962	95.1775	86.5429	91.8587	0.825815	0.962
		SD	32.2847	2.60768	28.1212	9.63328	0.0148324	0.5774	3.16534	1.32586	0.0249274	0.0148324
CHRM2
	Model Number		TP	FN	TN	FP	ROC-AUC	SE	SP	ACC	MCC	ROC-AUC
[1000,1000]	26	Train 1	949	18	1172	60	0.99	98.1386	95.1299	96.4529	0.92904	0.99
	27	Train 2	932	52	1204	11	1	94.7154	99.0947	97.1351	0.942507	1
0.4	28	Train 3	956	31	1175	37	0.99	96.8592	96.9472	96.9077	0.937549	0.99
0.001	29	Train 4	949	37	1194	19	0.99	96.2475	98.4336	97.4534	0.948561	0.99
100	30	Train 5	945	27	1193	34	0.99	97.2222	97.229	97.226	0.943826	0.99
		Avg	946.2	33	1187.6	32.2	0.992	96.6366	97.3669	97.035	0.940297	0.992
		SD	8.8713	12.6689	13.6125	18.86	0.00447214	1.27384	1.52664	0.379657	0.00741479	0.00447214
		Validation 1	313	19	355	46	0.97	94.2771	88.5287	91.1323	0.824554	0.97
		Validation 2	283	42	390	18	0.97	87.0769	95.5882	91.8145	0.834774	0.97
		Validation 3	303	25	378	27	0.97	92.378	93.3333	92.9059	0.85663	0.97
		Validation 4	295	18	295	25	0.98	94.2492	92.1875	93.207	0.864367	0.98
		Validation 5	323	15	365	30	0.98	95.5621	92.4051	93.8608	0.877604	0.98
		Avg	303.4	23.8	356.6	29.2	0.974	92.7087	92.4086	92.5841	0.851586	0.974
		SD	15.5177	10.8028	36.8822	10.3779	0.00547723	3.34669	2.55284	1.0979	0.0216743	0.00547723
		Test 1	320	14	370	29	0.98	95.8084	92.7318	94.1337	0.882921	0.98
		Test 2	287	37	392	17	0.98	88.5802	95.8435	92.633	0.851008	0.98
		Test 3	296	22	381	34	0.98	93.0818	91.8072	92.3602	0.845628	0.98
		Test 4	307	37	371	28	0.97	89.2442	92.9825	91.2517	0.823997	0.97
		Test 5	300	23	370	40	0.96	92.8793	90.2439	91.4052	0.827522	0.96
		Avg	302	26.6	376.8	29.6	0.974	91.9188	92.7218	92.3567	0.846215	0.974
		SD	12.3895	10.1143	9.67988	8.50294	0.00894427	2.98761	2.04876	1.15764	0.0235251	0.00894427
CHRM3
	Model Number		TP	FN	TN	FP	ROC-AUC	SE	SP	ACC	MCC	ROC-AUC
[1000,1000]	26	Train 1	863	40	671	16	0.99	95.5703	97.671	96.478	0.92897	0.99
	27	Train 2	879	43	655	13	0.99	95.3362	98.0539	96.478	0.928848	0.99
0.4	28	Train 3	853	33	685	19	1	96.2754	97.3011	96.7296	0.934006	1
0.001	29	Train 4	921	19	627	23	1	97.9787	96.4615	97.3585	0.945313	1
100	30	Train 5	911	20	624	35	1	97.8518	94.6889	96.5409	0.928671	1
		Avg	885.4	31	652.4	21.2	0.996	96.6025	96.8353	96.717	0.933161	0.996
		SD	29.6446	11.1131	26.7731	8.5557	0.00547723	1.24805	1.3367	0.373142	0.0071539	0.00547723
		Validation 1	306	25	179	20	0.96	92.4471	89.9497	91.5094	0.820026	0.96
		Validation 2	278	27	206	19	0.97	91.1475	91.5556	91.3208	0.823582	0.97
		Validation 3	302	22	187	19	0.96	93.2099	90.7767	92.2642	0.837703	0.96
		Validation 4	280	13	209	28	0.96	95.5631	88.1857	92.2642	0.843985	0.96
		Validation 5	299	14	191	26	0.98	95.5272	88.0184	92.4528	0.843542	0.98
		Avg	293	20.2	194.4	22.4	0.966	93.579	89.6972	91.9623	0.833768	0.966
		SD	13.0384	6.37966	12.7593	4.27785	0.00894427	1.94046	1.5641	0.509783	0.0112697	0.00894427
		Test 1	276	27	212	15	0.97	91.0891	93.3921	92.0755	0.840134	0.97
		Test 2	270	40	202	18	0.96	87.0968	91.8182	89.0566	0.780634	0.96
		Test 3	311	16	175	28	0.97	95.107	86.2069	91.6981	0.823323	0.97
		Test 4	287	17	198	28	0.97	94.4079	87.6106	91.5094	0.826092	0.97
		Test 5	277	16	208	29	0.96	94.5392	87.7637	91.5094	0.828397	0.96
		Avg	284.2	23.2	199	23.6	0.966	92.448	89.3583	91.1698	0.819716	0.966
		SD	16.1771	10.4738	14.4568	6.58027	0.00547723	3.38257	3.07615	1.20371	0.0227669	0.00547723
SLC6A2
	Model Number		TP	FN	TN	FP	ROC-AUC	SE	SP	ACC	MCC	ROC-AUC
[1000,1000]	26	Train 1	1664	78	1137	31	0.99	95.5224	97.3459	96.2543	0.923081	0.99
	27	Train 2	1675	76	1128	31	0.99	95.6596	97.3253	96.323	0.924261	0.99
0.4	28	Train 3	1683	51	1121	55	0.99	97.0588	95.3231	96.3574	0.924329	0.99
0.001	29	Train 4	1700	64	1109	37	0.99	96.3719	96.7714	96.5292	0.927778	0.99
100	30	Train 5	1656	71	1140	43	0.99	95.8888	96.3652	96.0825	0.919295	0.99
		Avg	1675.6	68	1127	39.4	0.99	96.1003	96.6262	96.3093	0.923749	0.99
		SD	17.0968	10.9316	12.5499	10.0399	0	0.625585	0.835744	0.162278	0.00304609	0
		Validation 1	537	29	379	25	0.97	94.8763	93.8119	94.433	0.885659	0.97
		Validation 2	555	34	360	21	0.98	94.2275	94.4882	94.3299	0.882188	0.98
		Validation 3	571	29	335	35	0.97	95.1667	90.5405	93.4021	0.859819	0.97
		Validation 4	555	26	355	34	0.98	95.525	91.2596	93.8144	0.870934	0.98
		Validation 5	551	35	356	28	0.97	94.0273	92.7083	93.5052	0.864738	0.97
		Avg	553.8	30.6	357	28.6	0.974	94.7646	92.5617	93.8969	0.872668	0.974
		SD	12.1326	3.78153	15.6684	5.94138	0.00547723	0.629357	1.66405	0.469044	0.0110725	0.00547723
		Test 1	563	39	338	30	0.98	93.5216	91.8478	92.8866	0.849819	0.98
		Test 2	524	46	377	23	0.97	91.9298	94.25	92.8866	0.855479	0.97
		Test 3	549	27	350	44	0.97	95.3125	88.8325	92.6804	0.847793	0.97
		Test 4	522	43	379	26	0.97	92.3894	93.5802	92.8866	0.855166	0.97
		Test 5	579	18	341	32	0.98	96.9849	91.4209	94.8454	0.890748	0.98
		Avg	547.4	34.6	357	31	0.974	94.0276	91.9863	93.2371	0.859801	0.974
		SD	24.684	11.7601	19.685	8.06226	0.00547723	2.10578	2.11839	0.90346	0.0176189	0.00547723
HTR2A
	Model Number		TP	FN	TN	FP	ROC-AUC	SE	SP	ACC	MCC	ROC-AUC
[1000,1000]	26	Train 1	2224	19	604	27	1	99.1529	95.7211	98.3994	0.953114	1
	27	Train 2	2255	20	577	22	1	99.1209	96.3272	98.5386	0.955658	1
0.4	28	Train 3	2236	10	588	40	1	99.5548	93.6306	98.2603	0.948627	1
0.001	29	Train 4	2231	17	604	22	1	99.2438	96.4856	98.643	0.960073	1
100	30	Train 5	2240	15	587	32	1	99.3348	94.8304	98.3646	0.951276	1
		Avg	2237.2	16.2	592	28.6	1	99.2814	95.399	98.4412	0.95375	1
		SD	11.606	3.96232	11.7686	7.60263	0	0.17412	1.18287	0.150464	0.00437009	0
		Validation 1	749	11	179	19	0.99	98.5526	90.404	96.8685	0.903359	0.99
		Validation 2	721	16	199	22	0.98	97.829	90.0452	96.0334	0.887315	0.98
		Validation 3	745	5	177	31	0.99	99.3333	85.0962	96.2422	0.88734	0.99
		Validation 4	744	9	186	19	0.98	98.8048	90.7317	97.0772	0.912	0.98
		Validation 5	751	10	169	28	0.98	98.6859	85.7868	96.0334	0.875884	0.98
		Avg	742	10.2	182	23.8	0.984	98.6411	88.4128	96.4509	0.89318	0.984
		SD	12.083	3.96232	11.2694	5.44977	0.00547723	0.542048	2.73419	0.489605	0.0143654	0.00547723
		Test 1	745	9	175	29	0.97	98.8064	85.7843	96.0334	0.879111	0.97
		Test 2	730	15	191	22	0.98	97.9866	89.6714	96.1378	0.88719	0.98
		Test 3	753	8	170	27	0.98	98.9488	86.2944	96.3466	0.885784	0.98
		Test 4	741	15	179	23	0.98	98.0159	88.6139	96.0334	0.879338	0.98
		Test 5	732	9	199	18	0.99	98.7854	91.7051	97.1816	0.918713	0.99
		Avg	740.2	11.2	182.8	23.8	0.98	98.5086	88.4138	96.3466	0.890027	0.98
		SD	9.47101	3.49285	11.9248	4.32435	0.00707107	0.467525	2.44233	0.484009	0.0164492	0.00707107
HTR3A
	Model Number		TP	FN	TN	FP	ROC-AUC	SE	SP	ACC	MCC	ROC-AUC
[1000,1000]	26	Train 1	256	18	628	1	0.99	93.4307	99.841	97.8959	0.950315	0.99
	27	Train 2	241	19	641	2	0.99	92.6923	99.689	97.6744	0.943194	0.99
0.4	28	Train 3	253	35	615	0	0.99	87.8472	100	96.124	0.911685	0.99
0.001	29	Train 4	253	25	623	2	0.99	91.0072	99.68	97.01	0.929931	0.99
100	30	Train 5	266	18	617	2	0.99	93.662	99.6769	97.7852	0.948665	0.99
		Avg	253.8	23	624.8	1.4	0.99	91.7279	99.7774	97.2979	0.936758	0.99
		SD	8.92749	7.31437	10.4019	0.894427	0	2.40568	0.142309	0.741227	0.0161418	0
		Validation 1	71	8	215	7	0.98	89.8734	96.8468	95.0166	0.870785	0.98
		Validation 2	78	12	202	9	0.96	86.6667	95.7346	93.0233	0.832204	0.96
		Validation 3	64	17	212	8	0.95	79.0123	96.3636	91.6944	0.783615	0.95
		Validation 4	78	12	205	6	0.96	86.6667	97.1564	94.0199	0.855572	0.96
		Validation 5	62	18	217	4	0.96	77.5	98.19	92.691	0.808117	0.96
		Avg	70.6	13.4	210.2	6.8	0.962	83.9438	96.8583	93.289	0.830059	0.962
		SD	7.53658	4.09878	6.45755	1.92354	0.0109545	5.38122	0.91787	1.27377	0.0351874	0.0109545
		Test 1	79	19	198	5	0.96	80.6122	97.5369	92.0266	0.816425	0.96
		Test 2	93	8	195	5	0.99	92.0792	97.5	95.6811	0.902655	0.99
		Test 3	64	18	217	2	0.98	78.0488	99.0868	93.3555	0.829999	0.98
		Test 4	74	9	213	5	0.98	89.1566	97.7064	95.3488	0.882292	0.98
		Test 5	63	24	211	3	0.93	72.4138	98.5981	91.0299	0.778022	0.93
		Avg	74.6	15.6	206.8	4	0.968	82.4621	98.0857	93.4884	0.841879	0.968
		SD	12.3004	6.8775	9.70567	1.41421	0.0238747	8.08043	0.716368	2.02903	0.050482	0.0238747
LCK
	Model Number		TP	FN	TN	FP	ROC-AUC	SE	SP	ACC	MCC	ROC-AUC
[1000,1000]	26	Train 1	995	19	315	24	0.99	98.1262	92.9204	96.8219	0.915002	0.99
	27	Train 2	995	25	309	24	0.99	97.549	92.7928	96.3784	0.902507	0.99
0.4	28	Train 3	1014	10	288	41	0.99	99.0234	87.538	96.2306	0.896062	0.99
0.001	29	Train 4	1016	21	295	21	0.99	97.9749	93.3544	96.8958	0.913294	0.99
100	30	Train 5	1050	25	264	14	0.99	97.6744	94.964	97.1175	0.913268	0.99
		Avg	1014	20	294.2	24.8	0.99	98.0696	92.3139	96.6888	0.908027	0.99
		SD	22.4833	6.16441	20.0175	9.93479	0	0.580764	2.80679	0.371024	0.00832902	0
		Validation 1	342	13	84	12	0.95	96.338	87.5	94.4568	0.835225	0.95
		Validation 2	328	20	87	16	0.96	94.2529	84.466	92.0177	0.776812	0.96
		Validation 3	330	16	91	14	0.98	95.3757	86.6667	93.3481	0.815079	0.98
		Validation 4	340	11	76	24	0.95	96.8661	76	92.2395	0.76713	0.95
		Validation 5	344	14	77	16	0.96	96.0894	82.7957	93.3481	0.795254	0.96
		Avg	336.8	14.8	83	16.4	0.96	95.7844	83.4857	93.082	0.7979	0.96
		SD	7.29383	3.42053	6.44205	4.5607	0.0122474	1.01022	4.57455	0.984139	0.0277794	0.0122474
		Test 1	350	13	67	21	0.94	96.4187	76.1364	92.4612	0.752715	0.94
		Test 2	356	8	74	13	0.98	97.8022	85.0575	95.3437	0.847683	0.98
		Test 3	351	11	67	22	0.94	96.9613	75.2809	92.6829	0.760219	0.94
		Test 4	326	18	86	21	0.95	94.7674	80.3738	91.3525	0.758872	0.95
		Test 5	275	24	1360	22	0.97	91.9732	98.4081	97.2635	0.906196	0.97
		Avg	331.6	14.8	330.8	19.8	0.956	95.5846	83.0513	93.8208	0.805137	0.956
		SD	33.709	6.30079	575.393	3.83406	0.0181659	2.30318	9.42365	2.41904	0.0687918	0.0181659
AVPR1A
	Model Number		TP	FN	TN	FP	ROC-AUC	SE	SP	ACC	MCC	ROC-AUC
[1000,1000]	26	Train 1	347	4	650	4	1	98.8604	99.3884	99.204	0.982488	1
	27	Train 2	378	4	619	4	1	98.9529	99.3579	99.204	0.983108	1
0.4	28	Train 3	373	12	618	2	1	96.8831	99.6774	98.607	0.970599	1
0.001	29	Train 4	345	5	649	6	1	98.5714	99.084	98.9055	0.975907	1
100	30	Train 5	381	6	612	6	1	98.4496	99.0291	98.806	0.974787	1
		Avg	364.8	6.2	629.6	4.4	1	98.3435	99.3074	98.9453	0.977378	1
		SD	17.4126	3.34664	18.3657	1.67332	0	0.841792	0.261431	0.259471	0.00533318	0
		Validation 1	129	7	193	6	0.98	94.8529	96.9849	96.1194	0.919466	0.98
		Validation 2	123	4	201	7	0.99	96.8504	96.6346	96.7164	0.930737	0.99
		Validation 3	113	3	217	2	0.99	97.4138	99.0868	98.5075	0.966987	0.99
		Validation 4	122	5	201	7	0.99	96.063	96.6346	96.4179	0.924216	0.99
		Validation 5	113	2	212	8	0.98	98.2609	96.3636	97.0149	0.935329	0.98
		Avg	120	4.2	204.8	6	0.986	96.6882	97.1409	96.9552	0.935347	0.986
		SD	6.9282	1.92354	9.60208	2.34521	0.00547723	1.30242	1.1099	0.929696	0.0186977	0.00547723
		Test 1	130	2	197	6	0.99	98.4848	97.0443	97.6119	0.95055	0.99
		Test 2	106	4	221	4	0.99	96.3636	98.2222	97.6119	0.945859	0.99
		Test 3	113	5	211	6	0.99	95.7627	97.235	96.7164	0.928203	0.99
		Test 4	135	7	189	4	0.99	95.0704	97.9275	96.7164	0.93274	0.99
		Test 5	113	4	210	8	0.99	96.5812	96.3303	96.4179	0.922127	0.99
		Avg	119.4	4.4	205.6	5.6	0.99	96.4526	97.3519	97.0149	0.935896	0.99
		SD	12.4218	1.81659	12.6016	1.67332	0	1.27875	0.748449	0.558456	0.0119658	0
AGTR1
	Model Number		TP	FN	TN	FP	ROC-AUC	SE	SP	ACC	MCC	ROC-AUC
[1000,1000]	26	Train 1	412	48	731	0	0.99	89.5652	100	95.9698	0.916768	0.99
	27	Train 2	442	32	715	2	0.99	93.2489	99.7211	97.1453	0.941109	0.99
0.4	28	Train 3	444	39	706	2	0.99	91.9255	99.7175	96.5575	0.929702	0.99
0.001	29	Train 4	430	47	714	0	1	90.1468	100	96.0537	0.91967	1
100	30	Train 5	499	32	659	1	0.99	93.9736	99.8485	97.2292	0.944932	0.99
		Avg	445.4	39.6	705	1	0.992	91.772	99.8574	96.5911	0.930436	0.992
		SD	32.5546	7.76531	27.2672	1	0.00447214	1.9081	0.140451	0.589538	0.0125229	0.00447214
		Validation 1	122	24	250	1	0.97	83.5616	99.6016	93.7028	0.867195	0.97
		Validation 2	154	19	219	5	0.98	89.0173	97.7679	93.9547	0.878225	0.98
		Validation 3	138	15	241	3	0.98	90.1961	98.7705	95.466	0.904769	0.98
		Validation 4	130	26	237	4	0.97	83.3333	98.3402	92.4433	0.843572	0.97
		Validation 5	143	28	225	1	0.96	83.6257	99.5575	92.6952	0.856735	0.96
		Avg	137.4	22.4	234.4	2.8	0.972	85.9468	98.8075	93.6524	0.870099	0.972
		SD	12.2393	5.31977	12.4419	1.78885	0.0083666	3.36865	0.789568	1.20011	0.0232313	0.0083666
		Test 1	173	27	195	2	0.98	86.5	98.9848	92.6952	0.860877	0.98
		Test 2	150	9	234	4	0.99	94.3396	98.3193	96.7254	0.931775	0.99
		Test 3	142	28	224	3	0.95	83.5294	98.6784	92.1914	0.844824	0.95
		Test 4	146	27	224	0	0.98	84.3931	100	93.199	0.867842	0.98
		Test 5	76	28	291	2	0.97	73.0769	99.3174	92.4433	0.801147	0.97
		Avg	137.4	23.8	233.6	2.2	0.974	84.3678	99.06	93.4509	0.861293	0.974
		SD	36.3703	8.28855	35.2463	1.48324	0.0151658	7.61858	0.642207	1.86806	0.0471685	0.0151658
AKT1
	Model Number		TP	FN	TN	FP	ROC-AUC	SE	SP	ACC	MCC	ROC-AUC
[1000,1000]	26	Train 1	1575	31	744	41	0.99	98.0697	94.7771	96.9887	0.931543	0.99
	27	Train 2	1617	18	709	47	0.99	98.8991	93.7831	97.2815	0.936854	0.99
0.4	28	Train 3	1629	34	705	23	0.99	97.9555	96.8407	97.6161	0.944007	0.99
0.001	29	Train 4	1630	25	692	44	0.99	98.4894	94.0217	97.1142	0.931955	0.99
100	30	Train 5	1673	24	656	38	1	98.5857	94.5245	97.4069	0.936782	1
		Avg	1624.8	26.4	701.2	38.6	0.992	98.3999	94.7894	97.2815	0.936228	0.992
		SD	35.0314	6.26897	31.76	9.34345	0.00447214	0.386727	1.21244	0.245657	0.00503548	0.00447214
		Validation 1	523	19	231	24	0.98	96.4945	90.5882	94.6048	0.875463	0.98
		Validation 2	549	11	205	32	0.97	98.0357	86.4979	94.6048	0.869326	0.97
		Validation 3	536	16	216	29	0.98	97.1014	88.1633	94.3538	0.866071	0.98
		Validation 4	573	16	186	22	0.98	97.2835	89.4231	95.2321	0.875402	0.98
		Validation 5	548	13	218	18	0.99	97.6827	92.3729	96.1104	0.906221	0.99
		Avg	545.8	15	211.2	25	0.98	97.3196	89.4091	94.9812	0.878497	0.98
		SD	18.5122	3.08221	16.8434	5.56776	0.00707107	0.586175	2.24732	0.709768	0.0160147	0.00707107
		Test 1	598	19	166	14	0.98	96.9206	92.2222	95.8595	0.882884	0.98
		Test 2	539	31	204	23	0.97	94.5614	89.8678	93.2246	0.835682	0.97
		Test 3	530	20	201	46	0.96	96.3636	81.3765	91.7189	0.803097	0.96
		Test 4	503	18	252	24	0.99	96.5451	91.3043	94.7302	0.883131	0.99
		Test 5	488	19	260	30	0.97	96.2525	89.6552	93.8519	0.866498	0.97
		Avg	531.6	21.4	216.6	27.4	0.974	96.1286	88.8852	93.877	0.854258	0.974
		SD	42.3828	5.41295	39.0487	11.8659	0.0114018	0.912059	4.32801	1.56058	0.0345162	0.0114018
BACE1
	Model Number		TP	FN	TN	FP	ROC-AUC	SE	SP	ACC	MCC	ROC-AUC
[1000,1000]	26	Train 1	3495	62	1395	220	0.99	98.257	86.3777	94.5476	0.871901	0.99
	27	Train 2	3569	65	1369	169	0.99	98.2113	89.0117	95.4756	0.890651	0.99
0.4	28	Train 3	3520	106	1432	114	0.99	97.0767	92.6261	95.7463	0.898367	0.99
0.001	29	Train 4	3508	102	1433	129	0.99	97.1745	91.7414	95.5336	0.893609	0.99
100	30	Train 5	3562	85	1400	125	0.99	97.6693	91.8033	95.9397	0.901764	0.99
		Avg	3530.8	84	1405.8	151.4	0.99	97.6778	90.312	95.4486	0.891259	0.99
		SD	32.9803	20.3347	27.0684	43.6268	0	0.555611	2.58803	0.536103	0.0116351	0
		Validation 1	1147	33	444	100	0.97	97.2034	81.6176	92.2854	0.818823	0.97
		Validation 2	1160	30	440	94	0.97	97.479	82.397	92.8074	0.829397	0.97
		Validation 3	1144	68	442	70	0.96	94.3894	86.3281	91.9954	0.80809	0.96
		Validation 4	1146	47	456	75	0.97	96.0604	85.8757	92.9234	0.832148	0.97
		Validation 5	1169	46	438	71	0.96	96.214	86.0511	93.2135	0.835082	0.96
		Avg	1153.2	44.8	444	82	0.966	96.2692	84.4539	92.645	0.824708	0.966
		SD	10.849	15.0233	7.07107	13.9821	0.00547723	1.21619	2.25612	0.494572	0.0111326	0.00547723
		Test 1	1250	29	350	95	0.96	97.7326	78.6517	92.8074	0.807121	0.96
		Test 2	1156	36	427	105	0.97	96.9799	80.2632	91.8213	0.805017	0.97
		Test 3	1116	62	495	51	0.97	94.7368	90.6593	93.4455	0.849463	0.97
		Test 4	1158	55	442	69	0.97	95.4658	86.4971	92.8074	0.826337	0.97
		Test 5	1085	69	500	70	0.97	94.0208	87.7193	91.9374	0.817765	0.97
		Avg	1153	50.2	442.8	78	0.968	95.7872	84.7581	92.5638	0.821141	0.968
		SD	62.1208	17.0792	60.9483	21.7486	0.00447214	1.54384	5.10172	0.678183	0.0180074	0.00447214
BCHE
	Model Number		TP	FN	TN	FP	ROC-AUC	SE	SP	ACC	MCC	ROC-AUC
[1000,1000]	26	Train 1	758	76	1249	44	0.99	90.8873	96.5971	94.3583	0.881287	0.99
	27	Train 2	779	79	1209	60	0.98	90.7925	95.2719	93.465	0.863891	0.98
0.4	28	Train 3	676	136	1291	24	0.98	83.2512	98.1749	92.4777	0.841867	0.98
0.001	29	Train 4	761	75	1244	47	0.98	91.0287	96.3594	94.2642	0.879408	0.98
100	30	Train 5	753	89	1245	40	0.98	89.4299	96.8872	93.9351	0.872951	0.98
		Avg	745.4	91	1247.6	43	0.982	89.0779	96.6581	93.7	0.867881	0.982
		SD	40.0162	25.7585	29.1342	13	0.00447214	3.32015	1.04496	0.767505	0.0160541	0.00447214
		Validation 1	238	47	397	27	0.95	83.5088	93.6321	89.5628	0.781763	0.95
		Validation 2	223	50	394	42	0.92	81.685	90.367	87.024	0.724696	0.92
		Validation 3	202	78	413	16	0.94	72.1429	96.2704	86.7419	0.724734	0.94
		Validation 4	242	41	395	31	0.96	85.5124	92.723	89.8449	0.787366	0.96
		Validation 5	243	54	390	22	0.95	81.8182	94.6602	89.2807	0.779922	0.95
		Avg	229.6	54	397.8	27.6	0.944	80.9334	93.5305	88.4908	0.759696	0.944
		SD	17.3868	14.2302	8.8713	9.81326	0.0151658	5.15317	2.20531	1.48465	0.0320507	0.0151658
		Test 1	222	59	388	40	0.92	79.0036	90.6542	86.0367	0.705895	0.92
		Test 2	227	42	394	46	0.95	84.3866	89.5455	87.5882	0.737243	0.95
		Test 3	217	91	386	15	0.94	70.4545	96.2594	85.0494	0.704792	0.94
		Test 4	219	62	398	30	0.93	77.9359	92.9907	87.024	0.726784	0.93
		Test 5	223	38	415	33	0.94	85.4406	92.6339	89.9859	0.78397	0.94
		Avg	221.6	58.4	396.2	32.8	0.936	79.4443	92.4167	87.1368	0.731737	0.936
		SD	3.84708	20.9833	11.5412	11.7346	0.0114018	5.99307	2.57357	1.86423	0.032315	0.0114018
CASP1
	Model Number		TP	FN	TN	FP	ROC-AUC	SE	SP	ACC	MCC	ROC-AUC
[1000,1000]	26	Train 1	570	254	1864	51	0.95	69.1748	97.3368	88.8645	0.728512	0.95
	27	Train 2	621	221	1826	71	0.96	73.753	96.2572	89.3392	0.743428	0.96
0.4	28	Train 3	502	303	1894	40	0.95	62.3602	97.9317	87.4772	0.6894	0.95
0.001	29	Train 4	541	263	1887	48	0.95	67.2886	97.5194	88.6455	0.718323	0.95
50	30	Train 5	581	213	1872	73	0.95	73.1738	96.2468	89.5582	0.738782	0.95
		Avg	563	250.8	1868.6	56.6	0.952	69.1501	97.0584	88.7769	0.723689	0.952
		SD	44.5589	36.0583	26.6045	14.639	0.00447214	4.66221	0.767026	0.812535	0.0214782	0.00447214
		Validation 1	198	94	580	41	0.89	67.8082	93.3977	85.2136	0.649385	0.89
		Validation 2	197	79	611	26	0.92	71.3768	95.9184	88.4995	0.719335	0.92
		Validation 3	156	128	616	13	0.88	54.9296	97.9332	84.5564	0.630093	0.88
		Validation 4	176	98	617	22	0.89	64.2336	96.5571	86.8565	0.676048	0.89
		Validation 5	194	87	608	24	0.9	69.0391	96.2025	87.8423	0.706344	0.9
		Avg	184.2	97.2	606.4	25.2	0.896	65.4775	96.0018	86.5936	0.676241	0.896
		SD	18.1163	18.6735	15.2086	10.1341	0.0151658	6.43672	1.64827	1.6819	0.0374639	0.0151658
		Test 1	174	79	631	29	0.91	68.7747	95.6061	88.1709	0.692965	0.91
		Test 2	166	85	630	32	0.87	66.1355	95.1662	87.1851	0.664129	0.87
		Test 3	144	136	615	18	0.9	51.4286	97.1564	83.1325	0.586415	0.9
		Test 4	177	114	606	16	0.9	60.8247	97.4277	85.7612	0.66483	0.9
		Test 5	192	102	585	34	0.87	65.3061	94.5073	85.1041	0.647567	0.87
		Avg	170.6	103.2	613.4	25.8	0.89	62.4939	95.9727	85.8708	0.651181	0.89
		SD	17.6011	22.9717	19.0342	8.25833	0.0187083	6.81626	1.26989	1.94395	0.0397098	0.0187083
CASP3
	Model Number		TP	FN	TN	FP	ROC-AUC	SE	SP	ACC	MCC	ROC-AUC
[1000,1000]	26	Train 1	605	76	1090	32	0.99	88.8399	97.148	94.01	0.872144	0.99
	27	Train 2	508	188	1104	3	0.99	72.9885	99.729	89.4065	0.785553	0.99
0.5	28	Train 3	657	73	1047	26	0.99	90	97.5769	94.5092	0.886199	0.99
0.001	29	Train 4	611	105	1071	16	0.99	85.3352	98.5281	93.289	0.8616	0.99
100	30	Train 5	596	119	1073	15	0.99	83.3566	98.6213	92.5679	0.847239	0.99
		Avg	595.4	112.2	1077	18.4	0.99	84.1041	98.3206	92.7565	0.850547	0.99
		SD	54.243	46.6122	21.5058	11.149	0	6.76056	1.00564	2.01148	0.0390346	0
		Validation 1	199	32	349	21	0.96	86.1472	94.3243	91.1814	0.812597	0.96
		Validation 2	148	86	364	3	0.96	63.2479	99.1826	85.1913	0.701847	0.96
		Validation 3	216	28	334	23	0.97	88.5246	93.5574	91.5141	0.823614	0.97
		Validation 4	174	52	365	10	0.96	76.9912	97.3333	89.6839	0.781133	0.96
		Validation 5	174	61	351	15	0.93	74.0426	95.9016	87.3544	0.7351	0.93
		Avg	182.2	51.8	352.6	14.4	0.956	77.7907	96.0599	88.985	0.770858	0.956
		SD	26.119	23.5202	12.7004	8.17313	0.0151658	10.1394	2.27334	2.6814	0.0516528	0.0151658
		Test 1	218	47	321	15	0.95	82.2642	95.5357	89.6839	0.792811	0.95
		Test 2	171	76	341	13	0.94	69.2308	96.3277	85.1913	0.699845	0.94
		Test 3	157	46	374	24	0.95	77.3399	93.9698	88.3527	0.735148	0.95
		Test 4	187	48	350	16	0.95	79.5745	95.6284	89.3511	0.775924	0.95
		Test 5	180	47	367	7	0.96	79.2952	98.1283	91.015	0.810775	0.96
		Avg	182.6	52.8	350.6	15	0.95	77.5409	95.918	88.7188	0.762901	0.95
		SD	22.7442	12.9885	21.1258	6.12372	0.00707107	4.96539	1.50655	2.18977	0.0450069	0.00707107
CASP8
	Model Number		TP	FN	TN	FP	ROC-AUC	SE	SP	ACC	MCC	ROC-AUC
[1000,1000]	26	Train 1	179	20	670	7	0.99	89.9497	98.966	96.9178	0.911001	0.99
	27	Train 2	180	16	674	6	0.99	91.8367	99.1176	97.4886	0.926883	0.99
0.4	28	Train 3	176	20	673	7	0.99	89.7959	98.9706	96.9178	0.909996	0.99
0.001	29	Train 4	172	29	669	6	0.99	85.5721	99.1111	96.0046	0.884932	0.99
100	30	Train 5	172	16	678	10	0.99	91.4894	98.5465	97.032	0.911115	0.99
		Avg	175.8	20.2	672.8	7.2	0.99	89.7288	98.9424	96.8721	0.908785	0.99
		SD	3.76829	5.31037	3.56371	1.64317	0	2.4937	0.233053	0.539074	0.0150693	0
		Validation 1	57	9	221	5	0.94	86.3636	97.7876	95.2055	0.860651	0.94
		Validation 2	68	7	216	1	0.98	90.6667	99.5392	97.2603	0.927723	0.98
		Validation 3	58	11	223	0	0.93	84.058	100	96.2329	0.895023	0.93
		Validation 4	70	4	217	1	0.98	94.5946	99.5413	98.2877	0.954496	0.98
		Validation 5	50	6	231	5	0.97	89.2857	97.8814	96.2329	0.877702	0.97
		Avg	60.6	7.4	221.6	2.4	0.96	88.9937	98.9499	96.6438	0.903119	0.96
		SD	8.29458	2.70185	5.98331	2.40832	0.0234521	4.04762	1.0359	1.17141	0.0379475	0.0234521
		Test 1	55	10	224	3	0.98	84.6154	98.6784	95.5479	0.868481	0.98
		Test 2	49	10	227	6	0.91	83.0508	97.4249	94.5205	0.826444	0.91
		Test 3	62	3	222	5	0.99	95.3846	97.7974	97.2603	0.921877	0.99
		Test 4	48	7	235	2	0.99	87.2727	99.1561	96.9178	0.89706	0.99
		Test 5	77	9	203	3	0.96	89.5349	98.5437	95.8904	0.900202	0.96
		Avg	58.2	7.8	222.2	3.8	0.966	87.9717	98.3201	96.0274	0.882813	0.966
		SD	11.9038	2.94958	11.8195	1.64317	0.0336155	4.83123	0.698564	1.0991	0.0367907	0.0336155
CHRM5
	Model Number		TP	FN	TN	FP	ROC-AUC	SE	SP	ACC	MCC	ROC-AUC
[1000,1000]	26	Train 1	385	32	631	8	0.99	92.3261	98.748	96.2121	0.921002	0.99
	27	Train 2	359	28	660	9	0.99	92.7649	98.6547	96.4962	0.924463	0.99
0.5	28	Train 3	388	23	635	10	0.99	94.4039	98.4496	96.875	0.93421	0.99
0.001	29	Train 4	388	28	629	11	1	93.2692	98.2812	96.3068	0.922631	1
100	30	Train 5	364	43	645	4	0.99	89.4349	99.3837	95.5492	0.907204	0.99
		Avg	376.8	30.8	640	8.4	0.992	92.4398	98.7035	96.2879	0.921902	0.992
		SD	14.1315	7.52994	12.7671	2.70185	0.00447214	1.85025	0.421232	0.484715	0.00968777	0.00447214
		Validation 1	101	21	219	11	0.96	82.7869	95.2174	90.9091	0.79698	0.96
		Validation 2	115	23	208	6	0.97	83.3333	97.1963	91.7614	0.827758	0.97
		Validation 3	117	22	206	7	0.95	84.1727	96.7136	91.7614	0.82774	0.95
		Validation 4	122	23	193	14	0.96	84.1379	93.2367	89.4886	0.782117	0.96
		Validation 5	108	26	214	4	0.96	80.597	98.1651	91.4773	0.821076	0.96
		Avg	112.6	23	208	8.4	0.96	83.0056	96.1058	91.0795	0.811134	0.96
		SD	8.20366	1.87083	9.82344	4.03733	0.00707107	1.46635	1.92486	0.954985	0.0205748	0.00707107
		Test 1	118	22	203	9	0.96	84.2857	95.7547	91.1932	0.815733	0.96
		Test 2	135	19	188	10	0.96	87.6623	94.9495	91.7614	0.832657	0.96
		Test 3	112	17	214	9	0.97	86.8217	95.9641	92.6136	0.839856	0.97
		Test 4	94	24	230	4	0.96	79.661	98.2906	92.0455	0.821002	0.96
		Test 5	89	49	204	10	0.94	64.4928	95.3271	83.2386	0.649552	0.94
		Avg	109.6	26.2	207.8	8.4	0.958	80.5847	96.0572	90.1705	0.79176	0.958
		SD	18.636	13.0269	15.4984	2.50998	0.0109545	9.51965	1.30846	3.9087	0.0800604	0.0109545
CHUK
	Model Number		TP	FN	TN	FP	ROC-AUC	SE	SP	ACC	MCC	ROC-AUC
[1000,1000]	26	Train 1	176	7	635	13	0.99	96.1749	97.9938	97.5933	0.930939	0.99
	27	Train 2	154	22	647	8	0.99	87.5	98.7786	96.3899	0.889835	0.99
0.5	28	Train 3	190	9	627	5	0.99	95.4774	99.2089	98.3153	0.953512	0.99
0.001	29	Train 4	197	12	618	4	1	94.2584	99.3569	98.0746	0.948521	1
100	30	Train 5	190	3	628	10	0.99	98.4456	98.4326	98.4356	0.956941	0.99
		Avg	181.4	10.6	631	8	0.992	94.3712	98.7542	97.7617	0.93595	0.992
		SD	17.1114	7.1624	10.7935	3.67423	0.00447214	4.1323	0.559502	0.83198	0.027653	0.00447214
		Validation 1	52	11	213	1	0.98	82.5397	99.5327	95.6679	0.874606	0.98
		Validation 2	49	14	213	1	1	77.7778	99.5327	94.5848	0.842593	1
		Validation 3	49	6	219	3	1	89.0909	98.6486	96.7509	0.896314	1
		Validation 4	48	13	207	9	0.96	78.6885	95.8333	92.0578	0.763883	0.96
		Validation 5	62	0	212	3	1	100	98.6047	98.917	0.969813	1
		Avg	52	8.8	212.8	3.4	0.988	85.6194	98.4304	95.5957	0.869442	0.988
		SD	5.78792	5.80517	4.26615	3.28634	0.0178885	9.19056	1.52093	2.54506	0.0753105	0.0178885
		Test 1	64	6	199	8	0.99	91.4286	96.1353	94.9458	0.867593	0.99
		Test 2	62	15	198	2	0.98	80.5195	99	93.8628	0.84519	0.98
		Test 3	55	7	207	8	0.98	88.7097	96.2791	94.5848	0.845083	0.98
		Test 4	34	12	230	1	0.98	73.913	99.5671	95.3069	0.823025	0.98
		Test 5	48	13	212	4	0.97	78.6885	98.1481	93.8628	0.815394	0.97
		Avg	52.6	10.6	209.2	4.6	0.98	82.6519	97.8259	94.5126	0.839257	0.98
		SD	12.1573	3.91152	12.9885	3.28634	0.00707107	7.25172	1.56245	0.645796	0.0206456	0.00707107
CSF1R
	Model Number		TP	FN	TN	FP	ROC-AUC	SE	SP	ACC	MCC	ROC-AUC
[1000,1000]	26	Train 1	772	17	631	11	1	97.8454	98.2866	98.0433	0.960518	1
	27	Train 2	786	17	624	4	1	97.8829	99.3631	98.5325	0.970436	1
0.5	28	Train 3	801	11	593	26	1	98.6453	95.7997	97.4144	0.947395	1
0.001	29	Train 4	800	7	600	24	1	99.1326	96.1538	97.8337	0.956098	1
100	30	Train 5	802	21	607	1	1	97.4484	99.8355	98.4626	0.96907	1
		Avg	792.2	14.6	611	13.2	1	98.1909	97.8877	98.0573	0.960703	1
		SD	13.0461	5.54977	16.0468	11.3886	0	0.681702	1.83684	0.461957	0.00952727	0
		Validation 1	266	6	197	8	0.99	97.7941	96.0976	97.065	0.940081	0.99
		Validation 2	253	11	199	14	0.99	95.8333	93.4272	94.7589	0.893894	0.99
		Validation 3	249	6	210	12	0.99	97.6471	94.5946	96.2264	0.924329	0.99
		Validation 4	254	4	198	21	1	98.4496	90.411	94.7589	0.896188	1
		Validation 5	239	22	209	7	0.99	91.5709	96.7593	93.9203	0.879797	0.99
		Avg	252.2	9.8	202.6	12.4	0.992	96.259	94.2579	95.3459	0.906858	0.992
		SD	9.73139	7.29383	6.34823	5.59464	0.00447214	2.79471	2.51214	1.27003	0.024613	0.00447214
		Test 1	268	7	185	17	0.99	97.4545	91.5842	94.9686	0.897114	0.99
		Test 2	261	8	202	6	1	97.026	97.1154	97.065	0.940423	1
		Test 3	263	6	190	18	0.99	97.7695	91.3462	94.9686	0.898216	0.99
		Test 4	257	14	181	25	0.98	94.8339	87.8641	91.8239	0.833243	0.98
		Test 5	232	20	220	5	0.99	92.0635	97.7778	94.7589	0.89699	0.99
		Avg	256.2	11	195.6	14.2	0.99	95.8295	93.1375	94.717	0.893197	0.99
		SD	14.0961	5.91608	15.7575	8.52643	0.00707107	2.39844	4.20674	1.87159	0.0383397	0.00707107
CSNK1D
	Model Number		TP	FN	TN	FP	ROC-AUC	SE	SP	ACC	MCC	ROC-AUC
[1000,1000]	26	Train 1	339	88	613	1	0.99	79.3911	99.8371	91.4505	0.830959	0.99
	27	Train 2	398	27	601	15	0.99	93.6471	97.5649	95.9654	0.916393	0.99
0.5	28	Train 3	339	66	634	2	0.99	83.7037	99.6855	93.4678	0.866243	0.99
0.001	29	Train 4	407	24	592	18	0.99	94.4316	97.0492	95.9654	0.916745	0.99
50	30	Train 5	409	11	581	40	0.99	97.381	93.5588	95.1009	0.900824	0.99
		Avg	378.4	43.2	604.2	15.2	0.99	89.7109	97.5391	94.39	0.886233	0.99
		SD	36.205	32.3836	20.3887	15.8019	0	7.73292	2.54813	1.93392	0.037109	0
		Validation 1	102	32	210	3	0.98	76.1194	98.5915	89.9135	0.791816	0.98
		Validation 2	127	24	188	8	0.97	84.106	95.9184	90.7781	0.813774	0.97
		Validation 3	128	30	188	1	0.98	81.0127	99.4709	91.0663	0.829361	0.98
		Validation 4	125	13	193	16	0.97	90.5797	92.3445	91.6427	0.826325	0.97
		Validation 5	132	11	175	29	0.97	92.3077	85.7843	88.4726	0.770762	0.97
		Avg	122.8	22	190.8	11.4	0.974	84.8251	94.4219	90.3746	0.806407	0.974
		SD	11.9038	9.61769	12.6372	11.4149	0.00547723	6.70719	5.56869	1.23281	0.024806	0.00547723
		Test 1	109	38	198	2	0.97	74.1497	99	88.4726	0.774941	0.97
		Test 2	118	14	206	9	0.97	89.3939	95.814	93.3718	0.858762	0.97
		Test 3	109	36	195	7	0.96	75.1724	96.5347	87.6081	0.749699	0.96
		Test 4	128	11	195	13	0.98	92.0863	93.75	93.0836	0.856381	0.98
		Test 5	135	10	182	20	0.96	93.1034	90.099	91.3545	0.825428	0.96
		Avg	119.8	21.8	195.2	10.2	0.968	84.7812	95.0395	90.7781	0.813042	0.968
		SD	11.5629	13.9714	8.64292	6.76018	0.0083666	9.34426	3.33886	2.63338	0.0489544	0.0083666
EDNRB
	Model Number		TP	FN	TN	FP	ROC-AUC	SE	SP	ACC	MCC	ROC-AUC
[1000,1000]	26	Train 1	425	17	767	18	1	96.1538	97.707	97.1475	0.938146	1
	27	Train 2	488	3	706	30	1	99.389	95.9239	97.3105	0.945461	1
0.4	28	Train 3	500	7	707	13	1	98.6193	98.1944	98.37	0.966495	1
0.001	29	Train 4	469	15	725	18	1	96.9008	97.5774	97.3105	0.943775	1
100	30	Train 5	504	11	697	15	1	97.8641	97.8933	97.881	0.956567	1
		Avg	477.2	10.6	720.4	18.8	1	97.7854	97.4592	97.6039	0.950089	1
		SD	32.1978	5.72713	27.9607	6.6106	0	1.29592	0.889027	0.510919	0.0113472	0
		Validation 1	142	7	256	4	1	95.302	98.4615	97.3105	0.941802	1
		Validation 2	153	6	224	26	0.98	96.2264	89.6	92.176	0.843333	0.98
		Validation 3	151	6	229	23	0.99	96.1783	90.873	92.9095	0.856283	0.99
		Validation 4	148	10	240	11	0.99	93.6709	95.6175	94.8655	0.89185	0.99
		Validation 5	172	2	225	10	1	98.8506	95.7447	97.066	0.941086	1
		Avg	153.2	6.2	234.8	14.8	0.992	96.0456	94.0594	94.8655	0.894871	0.992
		SD	11.3004	2.86356	13.4425	9.31128	0.0083666	1.87819	3.6975	2.33877	0.0460779	0.0083666
		Test 1	209	9	180	11	0.99	95.8716	94.2408	95.11	0.901752	0.99
		Test 2	152	7	236	14	0.99	95.5975	94.4	94.8655	0.893391	0.99
		Test 3	127	18	247	17	0.98	87.5862	93.5606	91.4425	0.812743	0.98
		Test 4	151	16	238	4	0.99	90.4192	98.3471	95.11	0.899355	0.99
		Test 5	112	8	269	20	0.98	93.3333	93.0796	93.154	0.841572	0.98
		Avg	150.2	11.6	234	13.2	0.986	92.5615	94.7256	93.9364	0.869763	0.986
		SD	36.9418	5.02991	32.9014	6.14003	0.00547723	3.53951	2.09302	1.61628	0.0403215	0.00547723
ELANE
	Model Number		TP	FN	TN	FP	ROC-AUC	SE	SP	ACC	MCC	ROC-AUC
[1000,1000]	26	Train 1	1172	71	824	36	0.99	94.288	95.814	94.912	0.89593	0.99
	27	Train 2	1206	55	801	41	0.99	95.6384	95.1306	95.4351	0.905276	0.99
0.4	28	Train 3	1190	63	819	31	0.99	94.9721	96.3529	95.5302	0.908202	0.99
0.001	29	Train 4	1259	68	749	27	0.99	94.8757	96.5206	95.4826	0.904822	0.99
50	30	Train 5	1204	100	774	25	0.99	92.3313	96.8711	94.0561	0.878531	0.99
		Avg	1206.2	71.4	793.4	32	0.99	94.4211	96.1378	95.0832	0.898552	0.99
		SD	32.4992	17.0968	31.6117	6.55744	0	1.26264	0.680036	0.625979	0.0120974	0
		Validation 1	374	36	268	23	0.97	91.2195	92.0962	91.5835	0.828387	0.97
		Validation 2	412	20	246	23	0.98	95.3704	91.4498	93.8659	0.870068	0.98
		Validation 3	396	43	238	24	0.97	90.205	90.8397	90.4422	0.800073	0.97
		Validation 4	393	45	240	23	0.96	89.726	91.2548	90.2996	0.79823	0.96
		Validation 5	386	43	258	14	0.98	89.9767	94.8529	91.8688	0.835117	0.98
		Avg	392.2	37.4	250	21.4	0.972	91.2995	92.0987	91.612	0.826375	0.972
		SD	13.9356	10.3102	12.7279	4.15933	0.0083666	2.34531	1.60501	1.43507	0.0294683	0.0083666
		Test 1	441	40	203	17	0.97	91.684	92.2727	91.8688	0.81866	0.97
		Test 2	418	23	229	31	0.98	94.7846	88.0769	92.2967	0.834133	0.98
		Test 3	415	27	241	18	0.98	93.8914	93.0502	93.5806	0.86353	0.98
		Test 4	304	65	312	20	0.96	82.3848	93.9759	87.8745	0.764732	0.96
		Test 5	361	40	284	16	0.97	90.0249	94.6667	92.0114	0.840485	0.97
		Avg	387.8	39	253.8	20.4	0.972	90.5539	92.4085	91.5264	0.824308	0.972
		SD	55.2784	16.4165	43.7573	6.10737	0.0083666	4.93276	2.58596	2.15071	0.0370061	0.0083666
EPHA2
	Model Number		TP	FN	TN	FP	ROC-AUC	SE	SP	ACC	MCC	ROC-AUC
[1000,1000]	26	Train 1	256	9	710	3	1	96.6038	99.5792	98.773	0.968839	1
	27	Train 2	293	18	666	1	1	94.2122	99.8501	98.0573	0.955338	1
0.4	28	Train 3	339	9	630	0	1	97.4138	100	99.0798	0.980009	1
0.001	29	Train 4	307	7	662	2	1	97.7707	99.6988	99.0798	0.978871	1
100	30	Train 5	309	19	650	0	1	94.2073	100	98.0573	0.956722	1
		Avg	300.8	12.4	663.6	1.2	1	96.0416	99.8256	98.6094	0.967956	1
		SD	30.1364	5.63915	29.4754	1.30384	0	1.72482	0.185877	0.519363	0.0117324	0
		Validation 1	87	9	225	5	0.97	90.625	97.8261	95.7055	0.895779	0.97
		Validation 2	105	12	207	2	0.99	89.7436	99.0431	95.7055	0.906984	0.99
		Validation 3	96	6	221	3	0.99	94.1176	98.6607	97.2393	0.935492	0.99
		Validation 4	96	11	218	1	0.99	89.7196	99.5434	96.319	0.916815	0.99
		Validation 5	112	12	200	2	0.99	90.3226	99.0099	95.7055	0.909443	0.99
		Avg	99.2	10	214.2	2.6	0.986	90.9057	98.8166	96.135	0.912903	0.986
		SD	9.57601	2.54951	10.3779	1.51658	0.00894427	1.83662	0.636843	0.672052	0.0147124	0.00894427
		Test 1	157	10	156	3	0.99	94.012	98.1132	96.0123	0.92113	0.99
		Test 2	87	13	226	0	0.98	87	100	96.0123	0.907016	0.98
		Test 3	71	7	244	4	0.99	91.0256	98.3871	96.6258	0.906369	0.99
		Test 4	95	12	217	2	0.98	88.785	99.0868	95.7055	0.902526	0.98
		Test 5	64	12	249	1	0.98	84.2105	99.6	96.0123	0.886949	0.98
		Avg	94.8	10.8	218.4	2	0.984	89.0066	99.0374	96.0736	0.904798	0.984
		SD	36.8944	2.38747	37.233	1.58114	0.00547723	3.74861	0.794132	0.336026	0.012226	0.00547723
FGFR1
	Model Number		TP	FN	TN	FP	ROC-AUC	SE	SP	ACC	MCC	ROC-AUC
[1000,1000]	26	Train 1	1194	28	758	42	0.99	97.7087	94.75	96.5381	0.927487	0.99
	27	Train 2	1254	34	698	36	0.99	97.3602	95.0954	96.5381	0.9251	0.99
0.5	28	Train 3	1279	28	654	61	0.99	97.8577	91.4685	95.5984	0.903286	0.99
0.001	29	Train 4	1320	11	616	75	1	99.1736	89.1462	95.7468	0.905659	1
100	30	Train 5	1314	22	641	45	0.99	98.3533	93.4402	96.6864	0.925787	0.99
		Avg	1272.2	24.6	673.4	51.8	0.992	98.0907	92.7801	96.2216	0.917464	0.992
		SD	51.2952	8.70632	55.8641	15.928	0.00447214	0.702731	2.48004	0.507496	0.0119206	0.00447214
		Validation 1	392	13	238	31	0.98	96.7901	88.4758	93.4718	0.863719	0.98
		Validation 2	438	15	194	27	0.98	96.6887	87.7828	93.7685	0.857346	0.98
		Validation 3	424	14	206	30	0.98	96.8037	87.2881	93.4718	0.855475	0.98
		Validation 4	420	8	208	38	0.98	98.1308	84.5528	93.1751	0.853001	0.98
		Validation 5	418	26	205	25	0.97	94.1441	89.1304	92.4332	0.831879	0.97
		Avg	418.4	15.2	210.2	30.2	0.978	96.5115	87.446	93.2641	0.852284	0.978
		SD	16.6973	6.6106	16.4682	4.96991	0.00447214	1.45095	1.76115	0.509661	0.0120773	0.00447214
		Test 1	530	6	123	15	0.99	98.8806	89.1304	96.8843	0.902747	0.99
		Test 2	403	19	226	26	0.96	95.4976	89.6825	93.3234	0.856808	0.96
		Test 3	402	16	223	33	0.98	96.1722	87.1094	92.73	0.844916	0.98
		Test 4	384	20	208	62	0.96	95.0495	77.037	87.8338	0.746607	0.96
		Test 5	371	12	266	25	0.98	96.8668	91.4089	94.5104	0.888214	0.98
		Avg	418	14.6	209.2	32.2	0.974	96.4934	86.8737	93.0564	0.847858	0.974
		SD	64.0117	5.72713	52.7513	17.8522	0.0134164	1.50147	5.7089	3.3249	0.0612003	0.0134164
FKBP1A
	Model Number		TP	FN	TN	FP	ROC-AUC	SE	SP	ACC	MCC	ROC-AUC
[1000,1000]	26	Train 1	189	12	608	7	1	94.0299	98.8618	97.6716	0.936889	1
	27	Train 2	198	3	602	13	1	98.5075	97.8862	98.0392	0.948561	1
0.5	28	Train 3	214	9	590	3	1	95.9641	99.4941	98.5294	0.962831	1
0.001	29	Train 4	203	16	587	10	0.99	92.6941	98.325	96.8137	0.918318	0.99
100	30	Train 5	196	23	59	5	0.99	89.4977	92.1875	90.106	0.75327	0.99
		Avg	200	12.6	489.2	7.6	0.996	94.1386	97.3509	96.232	0.903974	0.996
		SD	9.30054	7.50333	240.642	3.97492	0.00547723	3.39322	2.94839	3.48148	0.0858093	0.00547723
		Validation 1	59	10	201	2	0.99	85.5072	99.0148	95.5882	0.881731	0.99
		Validation 2	50	2	209	11	0.99	96.1538	95	95.2206	0.859373	0.99
		Validation 3	73	4	192	3	0.99	94.8052	98.4615	97.4265	0.936385	0.99
		Validation 4	65	9	192	6	0.99	87.8378	96.9697	94.4853	0.859322	0.99
		Validation 5	72	9	188	3	1	88.8889	98.4293	95.5882	0.893512	1
		Avg	63.8	6.8	196.4	5	0.992	90.6386	97.5751	95.6618	0.886065	0.992
		SD	9.57601	3.56371	8.50294	3.67423	0.00447214	4.61018	1.62679	1.0844	0.031757	0.00447214
		Test 1	79	5	184	4	0.99	94.0476	97.8723	96.6912	0.922271	0.99
		Test 2	98	3	164	7	0.99	97.0297	95.9064	96.3235	0.922339	0.99
		Test 3	40	14	210	8	0.97	74.0741	96.3303	91.9118	0.736682	0.97
		Test 4	59	2	208	3	1	96.7213	98.5782	98.1618	0.947526	1
		Test 5	45	9	215	3	1	83.3333	98.6239	95.5882	0.857566	1
		Avg	64.2	6.6	196.2	5	0.99	89.0412	97.4622	95.7353	0.877277	0.99
		SD	24.2012	4.9295	21.6148	2.34521	0.0122474	10.0556	1.2713	2.33391	0.0853603	0.0122474
FLT1
	Model Number		TP	FN	TN	FP	ROC-AUC	SE	SP	ACC	MCC	ROC-AUC
[1000,1000]	26	Train 1	638	27	1229	5	1	95.9398	99.5948	98.3149	0.963006	1
	27	Train 2	601	36	1257	5	0.99	94.3485	99.6038	97.841	0.951637	0.99
0.4	28	Train 3	632	16	1241	10	1	97.5309	99.2006	98.6309	0.969503	1
0.001	29	Train 4	651	16	1219	13	1	97.6012	98.9448	98.4729	0.966463	1
100	30	Train 5	628	28	1239	4	1	95.7317	99.6782	98.3149	0.962796	1
		Avg	630	24.6	1237	7.4	0.998	96.2304	99.4045	98.3149	0.962681	0.998
		SD	18.3984	8.59069	14.2127	3.91152	0.00447214	1.36427	0.317699	0.29555	0.00676247	0.00447214
		Validation 1	202	15	406	10	0.98	93.0876	97.5962	96.0506	0.912004	0.98
		Validation 2	178	27	426	2	0.99	86.8293	99.5327	95.4186	0.895852	0.99
		Validation 3	205	11	407	10	0.99	94.9074	97.6019	96.6825	0.926132	0.99
		Validation 4	205	12	407	9	0.98	94.47	97.8365	96.6825	0.92618	0.98
		Validation 5	200	24	402	7	0.99	89.2857	98.2885	95.1027	0.892631	0.99
		Avg	198	17.8	409.6	7.6	0.986	91.716	98.1712	95.9874	0.91056	0.986
		SD	11.3798	7.25948	9.39681	3.36155	0.00547723	3.51559	0.811515	0.72049	0.0160183	0.00547723
		Test 1	194	12	419	8	0.99	94.1748	98.1265	96.8404	0.927771	0.99
		Test 2	215	31	383	4	0.99	87.3984	98.9664	94.4708	0.884988	0.99
		Test 3	211	13	395	14	0.98	94.1964	96.577	95.7346	0.906824	0.98
		Test 4	192	12	415	14	0.99	94.1176	96.7366	95.8926	0.906236	0.99
		Test 5	180	28	420	5	0.98	86.5385	98.8235	94.7867	0.881588	0.98
		Avg	198.4	19.2	406.4	9	0.986	91.2851	97.846	95.545	0.901482	0.986
		SD	14.4326	9.47101	16.5469	4.79583	0.00547723	3.95242	1.13254	0.94391	0.0187753	0.00547723
FLT4
	Model Number		TP	FN	TN	FP	ROC-AUC	SE	SP	ACC	MCC	ROC-AUC
[1000,1000]	26	Train 1	376	26	650	1	1	93.5323	99.8464	97.4359	0.946253	1
	27	Train 2	394	13	641	5	0.99	96.8059	99.226	98.2906	0.963948	0.99
0.4	28	Train 3	401	7	643	2	1	98.2843	99.6899	99.1453	0.982003	1
0.001	29	Train 4	384	20	645	4	0.99	95.0495	99.3837	97.7208	0.951943	0.99
100	30	Train 5	390	9	650	4	0.99	97.7444	99.3884	98.7654	0.973756	0.99
		Avg	389	15	645.8	3.2	0.994	96.2833	99.5069	98.2716	0.963581	0.994
		SD	9.53939	7.90569	4.08656	1.64317	0.00547723	1.96862	0.253419	0.70876	0.0148215	0.00547723
		Validation 1	95	26	228	2	0.99	78.5124	99.1304	92.0228	0.825192	0.99
		Validation 2	133	11	204	3	0.98	92.3611	98.5507	96.0114	0.917906	0.98
		Validation 3	111	21	216	3	0.97	84.0909	98.6301	93.1624	0.855655	0.97
		Validation 4	131	5	213	2	1	96.3235	99.0698	98.0057	0.957971	1
		Validation 5	133	10	200	8	0.97	93.007	96.1538	94.8718	0.893624	0.97
		Avg	120.6	14.6	212.2	3.6	0.982	88.859	98.307	94.8148	0.89007	0.982
		SD	17.0529	8.61974	10.9636	2.50998	0.0130384	7.33104	1.23083	2.3528	0.0519412	0.0130384
		Test 1	125	26	198	2	0.98	82.7815	99	92.0228	0.842621	0.98
		Test 2	107	16	221	7	0.98	86.9919	96.9298	93.4473	0.855003	0.98
		Test 3	112	22	214	3	0.96	83.5821	98.6175	92.8775	0.850838	0.96
		Test 4	120	14	209	8	0.98	89.5522	96.3134	93.7322	0.866651	0.98
		Test 5	121	11	213	6	0.98	91.6667	97.2603	95.1567	0.89643	0.98
		Avg	117	17.8	211	5.2	0.976	86.9149	97.6242	93.4473	0.862309	0.976
		SD	7.31437	6.09918	8.45577	2.58844	0.00894427	3.79914	1.14153	1.15727	0.0209503	0.00894427
FYN
	Model Number		TP	FN	TN	FP	ROC-AUC	SE	SP	ACC	MCC	ROC-AUC
[1000,1000]	26	Train 1	205	35	653	4	0.98	85.4167	99.3912	95.6522	0.88809	0.98
	27	Train 2	227	33	633	4	0.99	87.3077	99.3721	95.8751	0.899355	0.99
0.3	28	Train 3	187	50	660	0	0.98	78.903	100	94.4259	0.856425	0.98
0.001	29	Train 4	216	37	643	1	0.99	85.3755	99.8447	95.7637	0.895492	0.99
100	30	Train 5	225	40	630	2	0.98	84.9057	99.6835	95.3177	0.887659	0.98
		Avg	212	39	643.8	2.2	0.984	84.3817	99.6583	95.4069	0.885404	0.984
		SD	16.4621	6.67083	12.7945	1.78885	0.00547723	3.1981	0.276334	0.586742	0.0169444	0.00547723
		Validation 1	58	21	206	14	0.95	73.4177	93.6364	88.2943	0.691466	0.95
		Validation 2	55	32	207	5	0.91	63.2184	97.6415	87.6254	0.690215	0.91
		Validation 3	53	41	203	2	0.92	56.383	99.0244	85.6187	0.663945	0.92
		Validation 4	50	27	211	11	0.94	64.9351	95.045	87.291	0.650842	0.94
		Validation 5	56	32	203	8	0.9	63.6364	96.2085	86.6221	0.664945	0.9
		Avg	54.4	30.6	206	8	0.924	64.3181	96.3112	87.0903	0.672283	0.924
		SD	3.04959	7.36885	3.31662	4.74342	0.0207364	6.07915	2.11539	1.01993	0.0178369	0.0207364
		Test 1	75	26	192	6	0.93	74.2574	96.9697	89.2977	0.757998	0.93
		Test 2	48	25	213	13	0.93	65.7534	94.2478	87.291	0.63962	0.93
		Test 3	47	42	209	1	0.94	52.809	99.5238	85.6187	0.65181	0.94
		Test 4	60	30	206	3	0.92	66.6667	98.5646	88.9632	0.733709	0.92
		Test 5	47	20	222	10	0.91	70.1493	95.6897	89.9666	0.698906	0.91
		Avg	55.4	28.6	208.4	6.6	0.926	65.9272	96.9991	88.2274	0.696409	0.926
		SD	12.2597	8.29458	10.9681	4.9295	0.0114018	8.06044	2.1278	1.76023	0.0510017	0.0114018
GSK3B
	Model Number		TP	FN	TN	FP	ROC-AUC	SE	SP	ACC	MCC	ROC-AUC
[1000,1000]	26	Train 1	1503	14	690	76	0.99	99.0771	90.0783	96.0578	0.911544	0.99
	27	Train 2	1518	12	633	120	0.99	99.2157	84.0637	94.2181	0.869649	0.99
0.4	28	Train 3	1521	22	683	57	0.99	98.5742	92.2973	96.5396	0.920616	0.99
0.001	29	Train 4	1542	20	669	52	0.99	98.7196	92.7878	96.8463	0.926639	0.99
100	30	Train 5	1480	23	730	50	0.99	98.4697	93.5897	96.8025	0.92865	0.99
		Avg	1512.8	18.2	681	71	0.99	98.8113	90.5634	96.0929	0.91142	0.99
		SD	23.0152	4.91935	35.1212	29.2575	0	0.322292	3.85985	1.09391	0.0242789	0
		Validation 1	481	28	199	53	0.96	94.499	78.9683	89.3561	0.755735	0.96
		Validation 2	517	11	165	68	0.95	97.9167	70.8155	89.6189	0.751312	0.95
		Validation 3	488	24	202	47	0.96	95.3125	81.1245	90.6702	0.784887	0.96
		Validation 4	464	21	218	58	0.96	95.6701	78.9855	89.6189	0.77331	0.96
		Validation 5	486	21	207	47	0.95	95.858	81.4961	91.0644	0.796293	0.95
		Avg	487.2	21	198.2	54.6	0.956	95.8513	78.278	90.0657	0.772307	0.956
		SD	19.1494	6.2849	19.9173	8.79204	0.00547723	1.26665	4.33374	0.752579	0.0190395	0.00547723
		Test 1	503	20	195	43	0.97	96.1759	81.9328	91.7214	0.804309	0.97
		Test 2	484	7	193	77	0.95	98.5743	71.4815	88.9619	0.761501	0.95
		Test 3	464	30	204	63	0.95	93.9271	76.4045	87.7792	0.727372	0.95
		Test 4	481	21	211	48	0.95	95.8167	81.4672	90.933	0.795461	0.95
		Test 5	520	19	167	55	0.93	96.475	75.2252	90.276	0.758404	0.93
		Avg	490.4	19.4	194	57.2	0.95	96.1938	77.3022	89.9343	0.769409	0.95
		SD	21.5708	8.20366	16.7332	13.3866	0.0141421	1.6603	4.40992	1.57304	0.0310142	0.0141421
HDAC3
	Model Number		TP	FN	TN	FP	ROC-AUC	SE	SP	ACC	MCC	ROC-AUC
[1000,1000]	26	Train 1	620	15	655	24	0.99	97.6378	96.4654	97.032	0.940688	0.99
	27	Train 2	619	20	653	22	0.99	96.8701	96.7407	96.8037	0.936035	0.99
0.4	28	Train 3	579	24	691	20	0.99	96.0199	97.1871	96.6514	0.932557	0.99
0.001	29	Train 4	635	10	630	39	0.99	98.4496	94.1704	96.2709	0.926356	0.99
100	30	Train 5	634	23	641	16	1	96.4992	97.5647	97.032	0.940693	1
		Avg	617.4	18.4	654	24.2	0.992	97.0953	96.4257	96.758	0.935266	0.992
		SD	22.7442	5.85662	23	8.78635	0.00447214	0.960592	1.32892	0.316539	0.00604506	0.00447214
		Validation 1	190	14	221	13	0.97	93.1373	94.4444	93.8356	0.876102	0.97
		Validation 2	194	9	216	19	0.98	95.5665	91.9149	93.6073	0.872804	0.98
		Validation 3	201	20	210	7	0.98	90.9502	96.7742	93.8356	0.878316	0.98
		Validation 4	215	4	200	19	0.97	98.1735	91.3242	94.7489	0.897084	0.97
		Validation 5	165	13	246	14	0.97	92.6966	94.6154	93.8356	0.872357	0.97
		Avg	193	12	218.6	14.4	0.974	94.1048	93.8146	93.9726	0.879332	0.974
		SD	18.3167	5.95819	17.1988	4.97996	0.00547723	2.80898	2.21405	0.445059	0.0102209	0.00547723
		Test 1	204	8	209	17	0.96	96.2264	92.4779	94.2922	0.886627	0.96
		Test 2	193	16	212	17	0.96	92.3445	92.5764	92.4658	0.849041	0.96
		Test 3	215	12	198	13	0.98	94.7137	93.8389	94.2922	0.885682	0.98
		Test 4	179	8	232	19	0.98	95.7219	92.4303	93.8356	0.876098	0.98
		Test 5	199	17	213	9	0.98	92.1296	95.9459	94.0639	0.881786	0.98
		Avg	198	12.2	212.8	15	0.972	94.2272	93.4539	93.79	0.875847	0.972
		SD	13.3417	4.26615	12.276	4	0.0109545	1.89816	1.5107	0.764073	0.0155471	0.0109545
IGF1R
	Model Number		TP	FN	TN	FP	ROC-AUC	SE	SP	ACC	MCC	ROC-AUC
[1000,1000]	26	Train 1	1404	14	727	24	1	99.0127	96.8043	98.248	0.96123	1
	27	Train 2	1481	41	632	15	1	97.3062	97.6816	97.4182	0.939407	1
0.4	28	Train 3	1421	42	695	11	1	97.1292	98.4419	97.5565	0.945466	1
0.001	29	Train 4	1483	40	641	5	1	97.3736	99.226	97.9253	0.951846	1
100	30	Train 5	1491	46	625	7	1	97.0072	98.8924	97.5565	0.942747	1
		Avg	1456	36.6	664	12.4	1	97.5658	98.2092	97.7409	0.948139	1
		SD	40.3361	12.8374	44.7325	7.53658	0	0.821669	0.975581	0.34036	0.00862522	0
		Validation 1	465	12	223	23	0.99	97.4843	90.6504	95.1591	0.891517	0.99
		Validation 2	463	25	225	10	0.99	94.877	95.7447	95.1591	0.892433	0.99
		Validation 3	458	39	214	12	0.98	92.1529	94.6903	92.9461	0.844032	0.98
		Validation 4	493	11	211	8	0.99	97.8175	96.347	97.3721	0.938057	0.99
		Validation 5	475	28	214	6	0.99	94.4334	97.2727	95.2974	0.894156	0.99
		Avg	470.8	23	217.4	11.8	0.988	95.353	94.941	95.1867	0.892039	0.988
		SD	13.8636	11.726	6.1887	6.64831	0.00447214	2.3414	2.57545	1.56605	0.0332687	0.00447214
		Test 1	582	6	123	12	0.99	98.9796	91.1111	97.5104	0.916954	0.99
		Test 2	444	29	244	6	0.99	93.8689	97.6	95.1591	0.897401	0.99
		Test 3	504	19	197	3	0.99	96.3671	98.5	96.9571	0.927151	0.99
		Test 4	426	30	249	18	0.98	93.4211	93.2584	93.361	0.859332	0.98
		Test 5	400	43	267	13	0.97	90.2935	95.3571	92.2545	0.843054	0.97
		Avg	471.2	25.4	216	10.4	0.984	94.586	95.1653	95.0484	0.888778	0.984
		SD	72.8093	13.7949	58.0603	5.94138	0.00894427	3.27006	3.04784	2.25666	0.0363955	0.00894427
INSR
	Model Number		TP	FN	TN	FP	ROC-AUC	SE	SP	ACC	MCC	ROC-AUC
[1000,1000]	26	Train 1	464	11	703	10	1	97.6842	98.5975	98.2323	0.963157	1
	27	Train 2	538	4	639	7	1	99.262	98.9164	99.0741	0.981359	1
0.4	28	Train 3	557	7	616	8	1	98.7589	98.7179	98.7374	0.974686	1
0.001	29	Train 4	539	11	632	6	1	98	99.0596	98.569	0.971239	1
100	30	Train 5	503	12	671	2	1	97.6699	99.7028	98.8215	0.976096	1
		Avg	520.2	9	652.2	6.6	1	98.275	98.9988	98.6869	0.973308	1
		SD	37.0095	3.39116	34.7376	2.96648	0	0.706944	0.431876	0.312697	0.00674212	0
		Validation 1	139	17	237	3	0.99	89.1026	98.75	94.9495	0.895079	0.99
		Validation 2	160	17	210	9	0.98	90.3955	95.8904	93.4343	0.867346	0.98
		Validation 3	169	9	207	11	0.99	94.9438	94.9541	94.9495	0.8981	0.99
		Validation 4	180	17	192	7	0.99	91.3706	96.4824	93.9394	0.879877	0.99
		Validation 5	175	19	194	8	0.98	90.2062	96.0396	93.1818	0.864767	0.98
		Avg	164.6	15.8	208	7.6	0.986	91.2037	96.4233	94.0909	0.881034	0.986
		SD	16.1338	3.89872	18.0139	2.96648	0.00547723	2.2405	1.4148	0.829883	0.0153448	0.00547723
		Test 1	241	15	135	5	0.99	94.1406	96.4286	94.9495	0.892589	0.99
		Test 2	161	7	224	4	0.99	95.8333	98.2456	97.2222	0.943119	0.99
		Test 3	134	11	232	19	0.98	92.4138	92.4303	92.4242	0.839447	0.98
		Test 4	128	12	249	7	0.99	91.4286	97.2656	95.202	0.894524	0.99
		Test 5	159	19	214	4	0.99	89.3258	98.1651	94.1919	0.884361	0.99
		Avg	164.6	12.8	210.8	7.8	0.988	92.6284	96.507	94.798	0.890808	0.988
		SD	45.1586	4.49444	44.2685	6.37966	0.00447214	2.49755	2.39653	1.73674	0.0368541	0.00447214
KDR
	Model Number		TP	FN	TN	FP	ROC-AUC	SE	SP	ACC	MCC	ROC-AUC
[1000,1000]	26	Train 1	4535	121	910	71	0.99	97.4012	92.7625	96.5939	0.884263	0.99
	27	Train 2	4467	235	908	27	0.99	95.0021	97.1123	95.3521	0.852187	0.99
0.3	28	Train 3	4583	88	835	131	0.99	98.116	86.4389	96.115	0.861067	0.99
0.001	29	Train 4	4661	100	794	82	0.99	97.8996	90.6393	96.7713	0.878092	0.99
100	30	Train 5	4548	120	851	118	0.99	97.4293	87.8225	95.7779	0.851822	0.99
		Avg	4558.8	132.8	859.6	85.8	0.99	97.1697	90.9551	96.1221	0.865486	0.99
		SD	70.9591	58.8022	49.6619	41.1424	0	1.24977	4.22749	0.582129	0.0149545	0
		Validation 1	1471	56	278	74	0.96	96.3327	78.9773	93.0814	0.768609	0.96
		Validation 2	1437	131	285	26	0.96	91.6454	91.6399	91.6445	0.745509	0.96
		Validation 3	1519	44	235	81	0.96	97.1849	74.3671	93.3475	0.752632	0.96
		Validation 4	1511	57	254	57	0.97	96.3648	81.672	93.9329	0.780368	0.97
		Validation 5	1528	52	250	49	0.97	96.7089	83.612	94.6248	0.799969	0.97
		Avg	1493.2	68	260.4	57.4	0.964	95.6473	82.0537	93.3262	0.769418	0.964
		SD	38.2256	35.5879	20.6712	21.7325	0.00547723	2.26334	6.38391	1.11164	0.0218368	0.00547723
		Test 1	1563	70	208	38	0.96	95.7134	84.5528	94.2523	0.762563	0.96
		Test 2	1438	108	286	47	0.95	93.0142	85.8859	91.7509	0.740105	0.95
		Test 3	1540	42	208	89	0.95	97.3451	70.0337	93.0282	0.723726	0.95
		Test 4	1431	56	320	72	0.96	96.234	81.6327	93.1879	0.790818	0.96
		Test 5	1506	62	230	81	0.95	96.0459	73.955	92.3896	0.718087	0.95
		Avg	1495.6	67.6	250.4	65.4	0.954	95.6705	79.212	92.9218	0.74706	0.954
		SD	59.3995	24.7952	50.3071	21.9841	0.00547723	1.60628	6.90657	0.936275	0.0299476	0.00547723
LTB4R
	Model Number		TP	FN	TN	FP	ROC-AUC	SE	SP	ACC	MCC	ROC-AUC
[1000,1000]	26	Train 1	197	14	616	1	1	93.3649	99.8379	98.1884	0.95216	1
	27	Train 2	191	16	621	0	0.99	92.2705	100	98.0676	0.948435	0.99
0.4	28	Train 3	184	13	630	1	0.99	93.401	99.8415	98.3092	0.95317	0.99
0.001	29	Train 4	187	22	617	2	1	89.4737	99.6769	97.1014	0.922702	1
100	30	Train 5	185	20	623	0	1	90.2439	100	97.5845	0.935077	1
		Avg	188.8	17	621.4	0.8	0.996	91.7508	99.8713	97.8502	0.942309	0.996
		SD	5.31037	3.87298	5.59464	0.83666	0.00547723	1.80657	0.135019	0.50088	0.0131272	0.00547723
		Validation 1	72	12	192	0	0.96	85.7143	100	95.6522	0.898177	0.96
		Validation 2	64	8	202	2	0.98	88.8889	99.0196	96.3768	0.904962	0.98
		Validation 3	64	10	201	1	0.96	86.4865	99.505	96.0145	0.897736	0.96
		Validation 4	52	14	210	0	0.95	78.7879	100	94.9275	0.85944	0.95
		Validation 5	59	16	201	0	0.95	78.6667	100	94.2029	0.853618	0.95
		Avg	62.2	12	201.2	0.6	0.96	83.7088	99.7049	95.4348	0.882787	0.96
		SD	7.36206	3.16228	6.37966	0.894427	0.0122474	4.69599	0.438992	0.872579	0.0242283	0.0122474
		Test 1	46	9	221	0	0.97	83.6364	100	96.7391	0.896458	0.97
		Test 2	61	10	205	0	0.97	85.9155	100	96.3768	0.905093	0.97
		Test 3	69	10	195	2	0.97	87.3418	98.9848	95.6522	0.892658	0.97
		Test 4	64	11	201	0	0.98	85.3333	100	96.0145	0.899476	0.98
		Test 5	56	14	206	0	0.96	80	100	94.9275	0.8655	0.96
		Avg	59.2	10.8	205.6	0.4	0.97	84.4454	99.797	95.942	0.891837	0.97
		SD	8.75785	1.92354	9.63328	0.894427	0.00707107	2.81757	0.454024	0.696934	0.0154088	0.00707107
LYN
	Model Number		TP	FN	TN	FP	ROC-AUC	SE	SP	ACC	MCC	ROC-AUC
[1000,1000]	26	Train 1	251	10	625	14	0.99	96.1686	97.8091	97.3333	0.93559	0.99
	27	Train 2	258	25	611	6	0.99	91.1661	99.0276	96.5556	0.919774	0.99
0.4	28	Train 3	242	29	622	7	0.99	89.2989	98.8871	96	0.904315	0.99
0.001	29	Train 4	238	27	627	8	0.99	89.8113	98.7402	96.1111	0.905627	0.99
100	30	Train 5	263	20	607	10	0.99	92.9329	98.3793	96.6667	0.922251	0.99
		Avg	250.4	22.2	618.4	9	0.99	91.8755	98.5686	96.5333	0.917511	0.99
		SD	10.5024	7.59605	8.87694	3.16228	0	2.78171	0.488429	0.529384	0.0129404	0
		Validation 1	86	5	203	6	0.99	94.5055	97.1292	96.3333	0.913541	0.99
		Validation 2	71	20	203	6	0.96	78.022	97.1292	91.3333	0.790919	0.96
		Validation 3	69	21	205	5	0.97	76.6667	97.619	91.3333	0.789707	0.97
		Validation 4	76	15	207	2	0.98	83.5165	99.0431	94.3333	0.865242	0.98
		Validation 5	72	18	206	4	0.97	80	98.0952	92.6667	0.822858	0.97
		Avg	74.8	15.8	204.8	4.6	0.974	82.5421	97.8031	93.2	0.836453	0.974
		SD	6.76018	6.45755	1.78885	1.67332	0.0114018	7.1674	0.800788	2.14217	0.0529499	0.0114018
		Test 1	91	11	194	4	0.98	89.2157	97.9798	95	0.887949	0.98
		Test 2	65	15	214	6	0.97	81.25	97.2727	93	0.816968	0.97
		Test 3	77	16	205	2	0.98	82.7957	99.0338	94	0.859265	0.98
		Test 4	81	17	197	5	0.97	82.6531	97.5248	92.6667	0.831547	0.97
		Test 5	62	19	215	4	0.97	76.5432	98.1735	92.3333	0.80076	0.97
		Avg	75.2	15.6	205	4.2	0.974	82.4915	97.9969	93.4	0.839298	0.974
		SD	11.8828	2.96648	9.56556	1.48324	0.00547723	4.53478	0.680814	1.09036	0.0346751	0.00547723
MAPK1
	Model Number		TP	FN	TN	FP	ROC-AUC	SE	SP	ACC	MCC	ROC-AUC
[1000,1000]	26	Train 1	1430	2260	6679	2	0.86	38.7534	99.9701	78.1892	0.537393	0.86
	27	Train 2	1558	2172	6636	5	0.86	41.7694	99.9247	79.0088	0.559278	0.86
0.3	28	Train 3	2136	1641	6373	221	0.87	56.5528	96.6485	82.0461	0.610894	0.87
0.001	29	Train 4	1876	1905	6502	88	0.86	49.6165	98.6646	80.783	0.593106	0.86
100	30	Train 5	2277	1442	6238	414	0.87	61.2261	93.7763	82.1039	0.601774	0.87
		Avg	1855.4	1884	6485.6	146	0.864	49.5837	97.7968	80.4262	0.580489	0.864
		SD	362.739	346.112	183.219	174.234	0.00547723	9.51938	2.62141	1.77338	0.0309994	0.00547723
		Validation 1	478	717	2259	3	0.77	40	99.8674	79.1727	0.547846	0.77
		Validation 2	486	748	2219	4	0.78	39.3841	99.8201	78.247	0.538521	0.78
		Validation 3	611	619	2088	139	0.77	49.6748	93.7584	78.0735	0.504499	0.77
		Validation 4	584	642	2171	60	0.78	47.6346	97.3106	79.6934	0.552269	0.78
		Validation 5	691	563	1981	222	0.79	55.1037	89.9228	77.2925	0.491055	0.79
		Avg	570	657.8	2143.6	85.6	0.778	46.3594	96.1359	78.4958	0.526838	0.778
		SD	89.4958	74.8044	110.999	94.3308	0.0083666	6.67414	4.27585	0.946132	0.0274046	0.0083666
		Test 1	594	730	2133	0	0.78	44.864	100	78.8834	0.578141	0.78
		Test 2	512	733	2206	6	0.78	41.1245	99.7288	78.6231	0.549464	0.78
		Test 3	548	654	2126	129	0.76	45.5907	94.2794	77.3503	0.478471	0.76
		Test 4	527	675	2192	63	0.78	43.8436	97.2062	78.652	0.519633	0.78
		Test 5	614	622	1998	223	0.75	49.6764	89.9595	75.5568	0.443464	0.75
		Avg	559	682.8	2131	84.2	0.77	45.0198	96.2348	77.8131	0.513835	0.77
		SD	43.6005	48.3084	82.2557	93.4436	0.0141421	3.10607	4.19915	1.39735	0.0539468	0.0141421
MAPK9
	Model Number		TP	FN	TN	FP	ROC-AUC	SE	SP	ACC	MCC	ROC-AUC
[1000,1000]	26	Train 1	717	10	653	9	1	98.6245	98.6405	98.6321	0.972585	1
	27	Train 2	730	9	643	7	1	98.7821	98.9231	98.8481	0.976875	1
0.4	28	Train 3	728	12	645	4	1	98.3784	99.3837	98.8481	0.976945	1
0.001	29	Train 4	714	4	658	13	1	99.4429	98.0626	98.7761	0.975565	1
100	30	Train 5	703	15	667	4	1	97.9109	99.4039	98.6321	0.972748	1
		Avg	718.4	10	653.2	7.4	1	98.6278	98.8827	98.7473	0.974944	1
		SD	11.0136	4.06202	9.80816	3.78153	0	0.562233	0.560238	0.109185	0.00215114	0
		Validation 1	229	10	208	16	0.99	95.8159	92.8571	94.3844	0.887776	0.99
		Validation 2	238	12	205	8	0.99	95.2	96.2441	95.6803	0.91331	0.99
		Validation 3	231	14	215	3	0.99	94.2857	98.6239	96.3283	0.927569	0.99
		Validation 4	260	12	173	18	0.98	95.5882	90.5759	93.5205	0.866003	0.98
		Validation 5	248	12	195	8	0.99	95.3846	96.0591	95.6803	0.912606	0.99
		Avg	241.2	12	199.2	10.6	0.988	95.2549	94.872	95.1188	0.901453	0.988
		SD	12.8725	1.41421	16.3156	6.22896	0.00447214	0.588429	3.1577	1.13878	0.0244477	0.00447214
		Test 1	246	15	193	9	0.99	94.2529	95.5446	94.8164	0.895278	0.99
		Test 2	219	19	215	10	0.99	92.0168	95.5556	93.7365	0.875429	0.99
		Test 3	228	14	211	10	0.99	94.2149	95.4751	94.8164	0.89633	0.99
		Test 4	232	5	206	20	0.99	97.8903	91.1504	94.6004	0.893667	0.99
		Test 5	231	18	207	7	0.99	92.7711	96.729	94.6004	0.892792	0.99
		Avg	231.2	14.2	206.4	11.2	0.99	94.2292	94.8909	94.514	0.890699	0.99
		SD	9.73139	5.54076	8.29458	5.06952	0	2.25971	2.15522	0.447871	0.00864623	0
MAPKAPK2
	Model Number		TP	FN	TN	FP	ROC-AUC	SE	SP	ACC	MCC	ROC-AUC
[1000,1000]	26	Train 1	476	22	659	34	0.99	95.5823	95.0938	95.2981	0.90389	0.99
	27	Train 2	448	34	687	22	0.99	92.9461	96.897	95.2981	0.902225	0.99
0.5	28	Train 3	465	22	689	15	0.99	95.4825	97.8693	96.8934	0.935661	0.99
0.001	29	Train 4	475	23	662	31	0.99	95.3815	95.5267	95.466	0.907118	0.99
100	30	Train 5	444	35	697	15	0.99	92.6931	97.8933	95.8018	0.912659	0.99
		Avg	461.6	27.2	678.8	23.4	0.99	94.4171	96.656	95.7515	0.912311	0.99
		SD	14.9432	6.68581	17.1523	8.84873	0	1.4628	1.30162	0.670654	0.0136468	0
		Validation 1	148	19	215	15	0.97	88.6228	93.4783	91.4358	0.823889	0.97
		Validation 2	147	23	215	12	0.95	86.4706	94.7137	91.1839	0.819827	0.95
		Validation 3	156	21	205	15	0.98	88.1356	93.1818	90.932	0.816261	0.98
		Validation 4	177	18	183	19	0.97	90.7692	90.5941	90.6801	0.813571	0.97
		Validation 5	141	22	218	16	0.96	86.5031	93.1624	90.4282	0.801524	0.96
		Avg	153.8	20.6	207.2	15.4	0.966	88.1002	93.026	90.932	0.815014	0.966
		SD	14.025	2.07364	14.3944	2.50998	0.0114018	1.77514	1.50083	0.398272	0.00847886	0.0114018
		Test 1	146	18	214	19	0.96	89.0244	91.8455	90.6801	0.80798	0.96
		Test 2	155	22	202	18	0.97	87.5706	91.8182	89.9244	0.795811	0.97
		Test 3	141	24	213	19	0.94	85.4545	91.8103	89.1688	0.776308	0.94
		Test 4	119	17	247	14	0.97	87.5	94.636	92.1914	0.825839	0.97
		Test 5	152	35	202	8	0.96	81.2834	96.1905	89.1688	0.788409	0.96
		Avg	142.6	23.2	215.6	15.6	0.96	86.1666	93.2601	90.2267	0.79887	0.96
		SD	14.2583	7.19027	18.4743	4.72229	0.0122474	3.01117	2.04097	1.26447	0.0189616	0.0122474
MET
	Model Number		TP	FN	TN	FP	ROC-AUC	SE	SP	ACC	MCC	ROC-AUC
[1000,1000]	26	Train 1	1679	19	667	44	1	98.881	93.8115	97.3848	0.936793	1
	27	Train 2	1715	24	636	34	1	98.6199	94.9254	97.5924	0.939815	1
0.5	28	Train 3	1710	20	649	30	1	98.8439	95.5817	97.9244	0.94855	1
0.001	29	Train 4	1711	17	653	28	1	99.0162	95.8884	98.132	0.953774	1
100	30	Train 5	1695	28	663	23	1	98.3749	96.6472	97.8829	0.948154	1
		Avg	1702	21.6	653.6	31.8	1	98.7472	95.3709	97.7833	0.945417	1
		SD	14.9332	4.39318	12.2393	7.8867	0	0.252203	1.06904	0.294406	0.00694447	0
		Validation 1	560	11	202	30	0.99	98.0736	87.069	94.8941	0.874164	0.99
		Validation 2	575	16	189	23	0.99	97.2927	89.1509	95.1432	0.873911	0.99
		Validation 3	562	12	202	27	0.99	97.9094	88.2096	95.1432	0.879444	0.99
		Validation 4	550	10	219	24	0.99	98.2143	90.1235	95.7659	0.898814	0.99
		Validation 5	560	10	217	16	0.99	98.2456	93.133	96.7621	0.92095	0.99
		Avg	561.4	11.8	205.8	24	0.99	97.9471	89.5372	95.5417	0.889457	0.99
		SD	8.93308	2.48998	12.3572	5.24404	0	0.389268	2.30639	0.754427	0.0203419	0
		Test 1	593	9	177	24	0.99	98.505	88.0597	95.8904	0.888869	0.99
		Test 2	522	19	238	24	0.98	96.488	90.8397	94.6451	0.877684	0.98
		Test 3	560	7	206	30	0.98	98.7654	87.2881	95.3923	0.887975	0.98
		Test 4	563	20	197	23	0.98	96.5695	89.5455	94.6451	0.864859	0.98
		Test 5	559	19	208	17	0.99	96.7128	92.4444	95.5168	0.889176	0.99
		Avg	559.4	14.8	205.2	23.6	0.984	97.4081	89.6355	95.2179	0.881713	0.984
		SD	25.2052	6.26099	22.0613	4.61519	0.00547723	1.12682	2.08216	0.554137	0.0105641	0.00547723
MMP13
	Model Number		TP	FN	TN	FP	ROC-AUC	SE	SP	ACC	MCC	ROC-AUC
[1000,1000]	26	Train 1	1397	30	650	23	0.99	97.8977	96.5825	97.4762	0.94224	0.99
	27	Train 2	1401	35	641	23	0.99	97.5627	96.5361	97.2381	0.93652	0.99
0.5	28	Train 3	1385	40	654	21	0.99	97.193	96.8889	97.0952	0.934099	0.99
0.001	29	Train 4	1408	20	628	44	0.99	98.5994	93.4524	96.9524	0.92963	0.99
100	30	Train 5	1417	34	624	25	0.99	97.6568	96.1479	97.1905	0.934513	0.99
		Avg	1401.6	31.8	639.4	27.2	0.99	97.7819	95.9216	97.1905	0.9354	0.99
		SD	11.9917	7.49667	13.1833	9.49737	0	0.522569	1.4052	0.193429	0.00457732	0
		Validation 1	452	17	216	15	0.99	96.3753	93.5065	95.4286	0.896866	0.99
		Validation 2	455	27	195	23	0.97	94.3983	89.4495	92.8571	0.83436	0.97
		Validation 3	456	21	209	14	0.99	95.5975	93.722	95	0.886023	0.99
		Validation 4	465	19	189	27	0.98	96.0744	87.5	93.4286	0.844712	0.98
		Validation 5	453	20	214	13	0.98	95.7717	94.2731	95.2857	0.893514	0.98
		Avg	456.2	20.8	204.6	18.4	0.982	95.6434	91.6902	94.4	0.871095	0.982
		SD	5.1672	3.76829	11.9708	6.22896	0.0083666	0.756655	3.02807	1.17543	0.029305	0.0083666
		Test 1	467	25	192	16	0.98	94.9187	92.3077	94.1429	0.861904	0.98
		Test 2	454	16	215	15	0.98	96.5957	93.4783	95.5714	0.899746	0.98
		Test 3	466	20	195	19	0.98	95.8848	91.1215	94.4286	0.868931	0.98
		Test 4	465	11	201	23	0.99	97.6891	89.7321	95.1429	0.887496	0.99
		Test 5	444	20	217	19	0.97	95.6897	91.9492	94.4286	0.875481	0.97
		Avg	459.2	18.4	204	18.4	0.98	96.1556	91.7177	94.7429	0.878712	0.98
		SD	9.98499	5.22494	11.4455	3.1305	0.00707107	1.04471	1.39635	0.59247	0.0150683	0.00707107
MMP2
	Model Number		TP	FN	TN	FP	ROC-AUC	SE	SP	ACC	MCC	ROC-AUC
[1000,1000]	26	Train 1	1697	39	966	67	0.99	97.7535	93.514	96.1719	0.917928	0.99
	27	Train 2	1700	65	970	34	0.99	96.3173	96.6135	96.4247	0.923431	0.99
0.5	28	Train 3	1646	88	993	42	0.99	94.925	95.942	95.3052	0.90116	0.99
0.001	29	Train 4	1726	43	931	69	0.99	97.5692	93.1	95.9552	0.912037	0.99
100	30	Train 5	1689	74	966	40	0.99	95.8026	96.0239	95.883	0.911966	0.99
		Avg	1691.6	61.8	965.2	50.4	0.99	96.4735	95.0387	95.948	0.913304	0.99
		SD	29.0224	20.7292	22.1743	16.3493	0	1.19491	1.60856	0.416801	0.00828849	0
		Validation 1	567	28	283	45	0.97	95.2941	86.2805	92.091	0.826027	0.97
		Validation 2	531	50	319	23	0.98	91.3941	93.2749	92.091	0.834752	0.98
		Validation 3	552	53	301	17	0.98	91.2397	94.6541	92.416	0.83945	0.98
		Validation 4	567	31	280	45	0.97	94.8161	86.1538	91.766	0.818201	0.97
		Validation 5	571	35	294	23	0.98	94.2244	92.7445	93.7161	0.862261	0.98
		Avg	557.6	39.4	295.4	30.6	0.976	93.3937	90.6216	92.416	0.836138	0.976
		SD	16.5469	11.371	15.6621	13.3716	0.00547723	1.93409	4.08085	0.762256	0.0167277	0.00547723
		Test 1	574	33	283	33	0.97	94.5634	89.557	92.8494	0.841204	0.97
		Test 2	559	33	297	34	0.96	94.4257	89.7281	92.7411	0.842101	0.96
		Test 3	543	56	303	21	0.97	90.6511	93.5185	91.6576	0.824052	0.97
		Test 4	519	52	303	49	0.97	90.8932	86.0795	89.0574	0.768489	0.97
		Test 5	538	31	305	49	0.97	94.5518	86.1582	91.3326	0.815636	0.97
		Avg	546.6	41	298.2	37.2	0.968	93.017	89.0083	91.5276	0.818296	0.968
		SD	20.9356	11.9791	9.0111	11.9248	0.00447214	2.05181	3.0766	1.53104	0.0300514	0.00447214
MMP3
	Model Number		TP	FN	TN	FP	ROC-AUC	SE	SP	ACC	MCC	ROC-AUC
[1000,1000]	26	Train 1	974	43	641	19	0.99	95.7719	97.1212	96.3029	0.92345	0.99
	27	Train 2	1023	22	575	57	0.99	97.8947	90.981	95.2892	0.899499	0.99
0.5	28	Train 3	1005	33	604	35	0.99	96.8208	94.5227	95.9451	0.913988	0.99
0.001	29	Train 4	1045	29	562	41	0.99	97.2998	93.2007	95.8259	0.909082	0.99
100	30	Train 5	1029	41	587	20	0.99	96.1682	96.7051	96.3626	0.922167	0.99
		Avg	1015.2	33.6	593.8	34.4	0.99	96.7911	94.5061	95.9451	0.913637	0.99
		SD	27.1146	8.6487	30.5892	15.8051	0	0.852126	2.53994	0.432063	0.00987159	0
		Validation 1	346	15	187	11	0.98	95.8449	94.4444	95.3488	0.898903	0.98
		Validation 2	337	10	190	22	0.98	97.1182	89.6226	94.2755	0.877999	0.98
		Validation 3	326	19	206	8	0.98	94.4928	96.2617	95.1699	0.899539	0.98
		Validation 4	369	8	168	14	0.99	97.878	92.3077	96.0644	0.909889	0.99
		Validation 5	332	30	185	12	0.97	91.7127	93.9086	92.4866	0.840758	0.97
		Avg	342	16.4	187.2	13.4	0.98	95.4093	93.309	94.6691	0.885417	0.98
		SD	16.778	8.73499	13.5536	5.27257	0.00707107	2.4346	2.49795	1.37641	0.027521	0.00707107
		Test 1	357	24	170	8	0.98	93.7008	95.5056	94.2755	0.873014	0.98
		Test 2	354	13	163	29	0.98	96.4578	84.8958	92.4866	0.831773	0.98
		Test 3	350	26	173	10	0.97	93.0851	94.5355	93.5599	0.858713	0.97
		Test 4	299	9	219	32	0.98	97.0779	87.251	92.6655	0.853507	0.98
		Test 5	301	26	215	17	0.97	92.0489	92.6724	92.3077	0.842924	0.97
		Avg	332.2	19.6	188	19.2	0.976	94.4741	90.9721	93.059	0.851986	0.976
		SD	29.5076	8.01873	26.7582	10.895	0.00547723	2.18653	4.66126	0.833332	0.0156559	0.00547723
MMP9
	Model Number		TP	FN	TN	FP	ROC-AUC	SE	SP	ACC	MCC	ROC-AUC
[1000,1000]	26	Train 1	1380	154	1038	86	0.97	89.9609	92.3488	90.9707	0.817601	0.97
	27	Train 2	1377	185	1040	56	0.97	88.1562	94.8905	90.933	0.82012	0.97
0.5	28	Train 3	1400	172	1006	80	0.97	89.0585	92.6335	90.5192	0.808383	0.97
0.001	29	Train 4	1328	213	1062	55	0.97	86.1778	95.0761	89.9172	0.802797	0.97
100	30	Train 5	1347	200	1042	69	0.97	87.0718	93.7894	89.8796	0.799373	0.97
		Avg	1366.4	184.8	1037.6	69.2	0.97	88.085	93.7477	90.4439	0.809655	0.97
		SD	28.6234	23.1236	20.1196	13.9176	0	1.51128	1.25208	0.528723	0.00904163	0
		Validation 1	426	72	334	54	0.93	85.5422	86.0825	85.7788	0.713197	0.93
		Validation 2	449	82	320	35	0.94	84.5574	90.1408	86.7946	0.735252	0.94
		Validation 3	411	85	333	57	0.92	82.8629	85.3846	83.9729	0.678655	0.92
		Validation 4	443	79	331	33	0.94	84.8659	90.9341	87.3589	0.747928	0.94
		Validation 5	443	82	321	40	0.93	84.381	88.9197	86.2302	0.723294	0.93
		Avg	434.4	80	327.8	43.8	0.932	84.4419	88.2923	86.0271	0.719665	0.932
		SD	15.6461	4.94975	6.76018	11.0318	0.0083666	0.987505	2.45599	1.29281	0.0263561	0.0083666
		Test 1	486	64	287	49	0.94	88.3636	85.4167	87.246	0.731916	0.94
		Test 2	384	105	357	40	0.91	78.5276	89.9244	83.6343	0.681447	0.91
		Test 3	431	83	320	52	0.93	83.8521	86.0215	84.763	0.692533	0.93
		Test 4	429	90	319	48	0.92	82.659	86.921	84.4244	0.687511	0.92
		Test 5	425	85	332	44	0.93	83.3333	88.2979	85.4402	0.709295	0.93
		Avg	431	85.4	323	46.6	0.926	83.3471	87.3163	85.1016	0.70054	0.926
		SD	36.3112	14.7411	25.2883	4.66905	0.0114018	3.50435	1.81709	1.36377	0.0203683	0.0114018
NEK2
	Model Number		TP	FN	TN	FP	ROC-AUC	SE	SP	ACC	MCC	ROC-AUC
[1000,1000]	26	Train 1	154	29	629	1	0.99	84.153	99.8413	96.31	0.893031	0.99
	27	Train 2	148	15	646	4	0.99	90.7975	99.3846	97.663	0.92608	0.99
0.4	28	Train 3	163	15	632	3	0.99	91.573	99.5276	97.786	0.93457	0.99
0.001	29	Train 4	172	14	622	5	0.99	92.4731	99.2026	97.663	0.933102	0.99
100	30	Train 5	156	24	630	3	1	86.6667	99.5261	96.679	0.902238	1
		Avg	158.6	19.4	631.8	3.2	0.992	89.1327	99.4964	97.2202	0.917804	0.992
		SD	9.20869	6.73053	8.78635	1.48324	0.00447214	3.56244	0.234323	0.677066	0.018971	0.00447214
		Validation 1	26	16	227	2	0.96	61.9048	99.1266	93.3579	0.725627	0.96
		Validation 2	46	15	208	2	0.97	75.4098	99.0476	93.7269	0.814535	0.97
		Validation 3	51	15	198	7	0.95	77.2727	96.5854	91.8819	0.772935	0.95
		Validation 4	53	15	196	7	0.97	77.9412	96.5517	91.8819	0.777858	0.97
		Validation 5	51	14	204	2	0.97	78.4615	99.0291	94.0959	0.834206	0.97
		Avg	45.4	15	206.6	4	0.964	74.198	98.0681	92.9889	0.785032	0.964
		SD	11.149	0.707107	12.3612	2.73861	0.00894427	6.96842	1.36944	1.0437	0.0418786	0.00894427
		Test 1	59	14	195	3	0.99	80.8219	98.4848	93.7269	0.837597	0.99
		Test 2	56	18	192	5	0.96	75.6757	97.4619	91.5129	0.780217	0.96
		Test 3	43	11	211	6	0.98	79.6296	97.235	93.7269	0.797772	0.98
		Test 4	29	15	225	2	0.97	65.9091	99.1189	93.7269	0.753448	0.97
		Test 5	31	22	217	1	0.9	58.4906	99.5413	91.5129	0.713278	0.9
		Avg	43.6	16	208	3.4	0.96	72.1054	98.3684	92.8413	0.776462	0.96
		SD	13.813	4.1833	14.1774	2.07364	0.0353553	9.60594	1.00732	1.21267	0.0467109	0.0353553
P2RY1
	Model Number		TP	FN	TN	FP	ROC-AUC	SE	SP	ACC	MCC	ROC-AUC
[1000,1000]	26	Train 1	336	10	646	4	1	97.1098	99.3846	98.5944	0.96896	1
	27	Train 2	299	8	685	4	1	97.3941	99.4194	98.7952	0.971689	1
0.4	28	Train 3	344	8	639	5	1	97.7273	99.2236	98.6948	0.971407	1
0.001	29	Train 4	305	20	669	2	1	93.8462	99.7019	97.7912	0.949859	1
100	30	Train 5	352	4	631	9	1	98.8764	98.5938	98.6948	0.971731	1
		Avg	327.2	10	654	4.8	1	96.9908	99.2647	98.5141	0.966729	1
		SD	23.7844	6	22.383	2.58844	0	1.88172	0.412725	0.410298	0.00950107	0
		Validation 1	100	3	225	4	1	97.0874	98.2533	97.8916	0.95089	1
		Validation 2	107	9	214	2	0.99	92.2414	99.0741	96.6867	0.927117	0.99
		Validation 3	122	1	208	1	1	99.187	99.5215	99.3976	0.987085	1
		Validation 4	108	4	218	2	0.99	96.4286	99.0909	98.1928	0.959488	0.99
		Validation 5	92	8	232	0	0.98	92	100	97.5904	0.943045	0.98
		Avg	105.8	5	219.4	1.8	0.992	95.3889	99.188	97.9518	0.953525	0.992
		SD	11.0995	3.39116	9.37017	1.48324	0.0083666	3.15368	0.645504	0.985267	0.0222262	0.0083666
		Test 1	106	5	220	1	0.99	95.4955	99.5475	98.1928	0.959389	0.99
		Test 2	126	11	195	0	1	91.9708	100	96.6867	0.933058	1
		Test 3	80	5	241	6	0.97	94.1176	97.5709	96.6867	0.91339	0.97
		Test 4	116	7	207	2	1	94.3089	99.0431	97.2892	0.941893	1
		Test 5	97	7	228	0	0.96	93.2692	100	97.8916	0.951268	0.96
		Avg	105	7	218.2	1.8	0.984	93.8324	99.2323	97.3494	0.939799	0.984
		SD	17.6918	2.44949	17.9081	2.48998	0.0181659	1.3093	1.00925	0.686853	0.0177664	0.0181659
PAK4
	Model Number		TP	FN	TN	FP	ROC-AUC	SE	SP	ACC	MCC	ROC-AUC
[1000,1000]	26	Train 1	201	14	673	0	1	93.4884	100	98.4234	0.956991	1
	27	Train 2	215	17	656	0	0.99	92.6724	100	98.0856	0.950429	0.99
0.4	28	Train 3	227	11	650	0	0.99	95.3782	100	98.7613	0.968457	0.99
0.001	29	Train 4	218	11	659	0	0.99	95.1965	100	98.7613	0.967644	0.99
100	30	Train 5	231	5	650	2	1	97.8814	99.6933	99.2117	0.979756	1
		Avg	218.4	11.6	657.6	0.4	0.994	94.9234	99.9387	98.6486	0.964656	0.994
		SD	11.6962	4.44972	9.44987	0.894427	0.00547723	2.0098	0.137182	0.421358	0.0113198	0.00547723
		Validation 1	51	17	228	0	0.95	75	100	94.2568	0.83544	0.95
		Validation 2	72	10	210	4	0.98	87.8049	98.1308	95.2703	0.880378	0.98
		Validation 3	53	11	230	2	0.98	82.8125	99.1379	95.6081	0.867352	0.98
		Validation 4	74	7	214	1	0.99	91.358	99.5349	97.2973	0.931676	0.99
		Validation 5	68	7	216	5	0.97	90.6667	97.7376	95.9459	0.892043	0.97
		Avg	63.6	10.4	219.6	2.4	0.974	85.5284	98.9082	95.6757	0.881378	0.974
		SD	10.8305	4.09878	8.87694	2.07364	0.0151658	6.7785	0.950293	1.1051	0.0351842	0.0151658
		Test 1	83	14	198	1	0.97	85.567	99.4975	94.9324	0.885632	0.97
		Test 2	61	5	228	2	0.98	92.4242	99.1304	97.6351	0.93104	0.98
		Test 3	55	23	217	1	0.98	70.5128	99.5413	91.8919	0.78797	0.98
		Test 4	59	11	224	2	0.99	84.2857	99.115	95.6081	0.876142	0.99
		Test 5	60	9	216	11	0.95	86.9565	95.1542	93.2432	0.813049	0.95
		Avg	63.6	12.4	216.6	3.4	0.974	83.9493	98.4877	94.6622	0.858766	0.974
		SD	11.0815	6.76757	11.5239	4.27785	0.0151658	8.12615	1.87408	2.20761	0.0577696	0.0151658
PDE4A
	Model Number		TP	FN	TN	FP	ROC-AUC	SE	SP	ACC	MCC	ROC-AUC
[1000,1000]	26	Train 1	384	15	595	8	1	96.2406	98.6733	97.7046	0.952066	1
	27	Train 2	356	18	623	5	1	95.1872	99.2038	97.7046	0.950963	1
0.4	28	Train 3	390	23	579	10	1	94.431	98.3022	96.7066	0.932051	1
0.001	29	Train 4	379	21	599	3	1	94.75	99.5017	97.6048	0.950363	1
100	30	Train 5	365	24	610	3	1	93.8303	99.5106	97.3054	0.943645	1
		Avg	374.8	20.2	601.2	5.8	1	94.8878	99.0383	97.4052	0.945818	1
		SD	13.9893	3.70135	16.4985	3.11448	0	0.903547	0.533908	0.423417	0.00837284	0
		Validation 1	114	9	197	14	0.96	92.6829	93.3649	93.1138	0.85368	0.96
		Validation 2	115	19	197	3	0.96	85.8209	98.5	93.4132	0.864639	0.96
		Validation 3	114	16	199	5	0.97	87.6923	97.549	93.7126	0.867849	0.97
		Validation 4	108	16	205	5	0.98	87.0968	97.619	93.7126	0.865067	0.98
		Validation 5	109	17	202	6	0.97	86.5079	97.1154	93.1138	0.853048	0.97
		Avg	112	15.4	200	6.6	0.968	87.9602	96.8297	93.4132	0.860857	0.968
		SD	3.24037	3.78153	3.4641	4.27785	0.0083666	2.72979	2.00104	0.299401	0.00695349	0.0083666
		Test 1	118	13	194	9	0.96	90.0763	95.5665	93.4132	0.861366	0.96
		Test 2	138	7	181	8	0.98	95.1724	95.7672	95.509	0.908683	0.98
		Test 3	80	30	219	5	0.97	72.7273	97.7679	89.521	0.760625	0.97
		Test 4	112	17	196	9	0.96	86.8217	95.6098	92.2156	0.834992	0.96
		Test 5	116	22	190	6	0.96	84.058	96.9388	91.6168	0.828299	0.96
		Avg	112.8	17.8	196	7.4	0.966	85.7711	96.33	92.4551	0.838793	0.966
		SD	20.9093	8.75785	14.089	1.81659	0.00894427	8.38302	0.981895	2.21435	0.0539191	0.00894427
PDE5A
	Model Number		TP	FN	TN	FP	ROC-AUC	SE	SP	ACC	MCC	ROC-AUC
[1000,1000]	26	Train 1	903	55	669	8	0.99	94.2589	98.8183	96.1468	0.922979	0.99
	27	Train 2	908	24	676	27	0.99	97.4249	96.1593	96.8807	0.93634	0.99
0.4	28	Train 3	914	32	661	28	0.99	96.6173	95.9361	96.3303	0.924817	0.99
0.001	29	Train 4	870	36	705	24	0.99	96.0265	96.7078	96.3303	0.925956	0.99
100	30	Train 5	890	43	691	11	0.99	95.3912	98.433	96.6972	0.933714	0.99
		Avg	897	38	680.4	19.6	0.99	95.9438	97.2109	96.4771	0.928761	0.99
		SD	17.4929	11.726	17.6295	9.39681	0	1.204	1.32866	0.301499	0.00589116	0
		Validation 1	272	36	227	10	0.96	88.3117	95.7806	91.5596	0.834263	0.96
		Validation 2	297	17	212	19	0.97	94.586	91.7749	93.3945	0.864623	0.97
		Validation 3	295	17	210	23	0.98	94.5513	90.1288	92.6606	0.849786	0.98
		Validation 4	271	21	234	19	0.96	92.8082	92.4901	92.6606	0.852556	0.96
		Validation 5	278	25	226	16	0.97	91.7492	93.3884	92.4771	0.848672	0.97
		Avg	282.6	23.2	221.8	17.4	0.968	92.4013	92.7126	92.5505	0.84998	0.968
		SD	12.5419	7.8867	10.3537	4.82701	0.0083666	2.58414	2.09012	0.65646	0.0108375	0.0083666
		Test 1	261	24	224	36	0.93	91.5789	86.1538	88.9908	0.779667	0.93
		Test 2	289	16	217	23	0.97	94.7541	90.4167	92.844	0.854655	0.97
		Test 3	260	33	234	18	0.96	88.7372	92.8571	90.6422	0.813797	0.96
		Test 4	330	23	179	13	0.97	93.4844	93.2292	93.3945	0.857635	0.97
		Test 5	289	26	212	18	0.96	91.746	92.1739	91.9266	0.835654	0.96
		Avg	285.8	24.4	213.2	21.6	0.958	92.0601	90.9661	91.5596	0.828282	0.958
		SD	28.5254	6.10737	20.8255	8.79204	0.0164317	2.27256	2.89896	1.77423	0.0323445	0.0164317
PIK3CA
	Model Number		TP	FN	TN	FP	ROC-AUC	SE	SP	ACC	MCC	ROC-AUC
[1000,1000]	26	Train 1	2776	24	1217	69	1	99.1429	94.6345	97.7239	0.947045	1
	27	Train 2	2840	20	1174	52	1	99.3007	95.7586	98.2379	0.957903	1
0.4	28	Train 3	2883	19	1134	50	1	99.3453	95.777	98.3113	0.958818	1
0.001	29	Train 4	2809	19	1202	56	1	99.3281	95.5485	98.1645	0.956796	1
100	30	Train 5	2787	30	1235	34	1	98.935	97.3207	98.4337	0.963395	1
		Avg	2819	22.4	1192.4	52.2	1	99.2104	95.8079	98.1743	0.956791	1
		SD	43.3301	4.72229	39.5639	12.5778	0	0.173636	0.966453	0.270654	0.0059987	0
		Validation 1	920	10	398	34	1	98.9247	92.1296	96.7695	0.925081	1
		Validation 2	933	16	383	30	0.99	98.314	92.7361	96.6226	0.919579	0.99
		Validation 3	944	16	364	38	0.99	98.3333	90.5473	96.0352	0.903874	0.99
		Validation 4	912	11	418	21	0.99	98.8082	95.2164	97.6505	0.946031	0.99
		Validation 5	906	21	407	28	0.99	97.7346	93.5632	96.4023	0.916959	0.99
		Avg	923	14.8	394	30.2	0.992	98.423	92.8385	96.696	0.922305	0.992
		SD	15.4919	4.43847	21.1069	6.41872	0.00447214	0.472735	1.72789	0.60098	0.0153812	0.00447214
		Test 1	985	9	343	25	0.99	99.0946	93.2065	97.5037	0.93625	0.99
		Test 2	908	7	418	29	0.99	99.235	93.5123	97.3568	0.939942	0.99
		Test 3	848	14	461	39	0.98	98.3759	92.2	96.1087	0.916099	0.98
		Test 4	956	17	357	32	0.99	98.2528	91.7738	96.4023	0.911146	0.99
		Test 5	961	19	362	20	0.99	98.0612	94.7644	97.1366	0.929	0.99
		Avg	931.6	13.2	388.2	29	0.988	98.6039	93.0914	96.9016	0.926487	0.988
		SD	54.4454	5.11859	49.7263	7.17635	0.00447214	0.526487	1.17474	0.61297	0.0125094	0.00447214
PPARG
	Model Number		TP	FN	TN	FP	ROC-AUC	SE	SP	ACC	MCC	ROC-AUC
[1000,1000]	26	Train 1	1947	646	4305	89	0.95	75.0868	97.9745	89.4805	0.776754	0.95
	27	Train 2	1826	788	4292	81	0.94	69.8546	98.1477	87.5626	0.738685	0.94
0.4	28	Train 3	2032	635	4184	136	0.95	76.1905	96.8519	88.9652	0.767043	0.95
0.001	29	Train 4	2006	661	4205	115	0.94	75.2156	97.338	88.8937	0.766577	0.94
100	30	Train 5	1890	677	4332	88	0.95	73.6268	98.009	89.0511	0.766595	0.95
		Avg	1940.2	681.4	4263.6	101.8	0.946	73.9949	97.6642	88.7906	0.763131	0.946
		SD	84.2093	61.6547	65.1329	23.0803	0.00547723	2.48898	0.551215	0.72333	0.0143384	0.00547723
		Validation 1	652	249	1369	59	0.91	72.364	95.8683	86.7754	0.721594	0.91
		Validation 2	595	262	1428	44	0.91	69.4282	97.0109	86.8613	0.718082	0.91
		Validation 3	637	252	1365	75	0.9	71.6535	94.7917	85.9596	0.700649	0.9
		Validation 4	610	226	1437	56	0.91	72.9665	96.2492	87.8918	0.734775	0.91
		Validation 5	598	259	1423	49	0.91	69.7783	96.6712	86.7754	0.715436	0.91
		Avg	618.4	249.6	1404.4	56.6	0.908	71.2381	96.1182	86.8527	0.718107	0.908
		SD	25.046	14.188	34.5369	11.8448	0.00447214	1.56799	0.857603	0.687258	0.0122666	0.00447214
		Test 1	591	277	1390	71	0.9	68.0876	95.1403	85.058	0.677792	0.9
		Test 2	632	259	1401	37	0.92	70.9315	97.427	87.2907	0.73425	0.92
		Test 3	558	248	1472	51	0.91	69.2308	96.6513	87.1619	0.713201	0.91
		Test 4	601	258	1417	53	0.9	69.9651	96.3946	86.6466	0.712464	0.9
		Test 5	653	285	1337	54	0.91	69.6162	96.1179	85.4444	0.701166	0.91
		Avg	607	265.4	1403.4	53.2	0.908	69.5662	96.3462	86.3203	0.707775	0.908
		SD	36.8578	15.1427	48.696	12.0913	0.0083666	1.03979	0.832139	1.01453	0.0205851	0.0083666
PTPN1
	Model Number		TP	FN	TN	FP	ROC-AUC	SE	SP	ACC	MCC	ROC-AUC
[1000,1000]	26	Train 1	688	169	1312	21	0.98	80.28	98.4246	91.3242	0.820928	0.98
	27	Train 2	757	70	1264	99	0.98	91.5357	92.7366	92.2831	0.83728	0.98
0.4	28	Train 3	829	61	1219	81	0.98	93.1461	93.7692	93.516	0.866238	0.98
0.001	29	Train 4	733	148	1284	25	0.98	83.2009	98.0901	92.1005	0.837904	0.98
100	30	Train 5	722	190	1261	17	0.98	79.1667	98.6698	90.5479	0.811503	0.98
		Avg	745.8	127.6	1268	48.6	0.98	85.4659	96.3381	91.9543	0.834771	0.98
		SD	52.7229	58.6882	34.1248	38.4292	1.24127e-16	6.47168	2.84736	1.11166	0.0208525	1.24127e-16
		Validation 1	202	92	415	21	0.93	68.7075	95.1835	84.5205	0.680299	0.93
		Validation 2	252	54	358	66	0.9	82.3529	84.434	83.5616	0.664619	0.9
		Validation 3	244	57	367	62	0.92	81.0631	85.5478	83.6986	0.664528	0.92
		Validation 4	205	88	400	37	0.9	69.9659	91.5332	82.8767	0.640362	0.9
		Validation 5	188	135	386	21	0.9	58.2043	94.8403	78.6301	0.582838	0.9
		Avg	218.2	85.2	385.2	41.4	0.91	72.0588	90.3077	82.6575	0.646529	0.91
		SD	28.0927	32.7979	23.3388	21.6864	0.0141421	9.93233	5.07388	2.32595	0.0383609	0.0141421
		Test 1	215	105	372	38	0.89	67.1875	90.7317	80.411	0.603907	0.89
		Test 2	269	69	332	60	0.89	79.5858	84.6939	82.3288	0.644177	0.89
		Test 3	189	91	391	59	0.87	67.5	86.8889	79.4521	0.558401	0.87
		Test 4	204	93	388	45	0.89	68.6869	89.6074	81.0959	0.604054	0.89
		Test 5	160	76	472	22	0.91	67.7966	95.5466	86.5753	0.684847	0.91
		Avg	207.4	86.8	391	44.8	0.89	70.1514	89.4937	81.9726	0.619077	0.89
		SD	40.1535	14.3248	51.0196	15.8019	0.0141421	5.30359	4.12329	2.77816	0.0476787	0.0141421
PTPN11
	Model Number		TP	FN	TN	FP	ROC-AUC	SE	SP	ACC	MCC	ROC-AUC
[1000,1000]	26	Train 1	161	46	711	21	0.97	77.7778	97.1311	92.8647	0.78558	0.97
	27	Train 2	163	54	708	14	0.97	75.1152	98.0609	92.7583	0.788686	0.97
0.4	28	Train 3	174	43	704	18	0.98	80.1843	97.5069	93.5037	0.812007	0.98
0.001	29	Train 4	159	40	733	7	0.97	79.8995	99.0541	94.9947	0.845805	0.97
100	30	Train 5	157	52	714	16	0.97	75.1196	97.8082	92.7583	0.782511	0.97
		Avg	162.8	47	714	15.2	0.972	77.6193	97.9123	93.3759	0.802918	0.972
		SD	6.64831	5.91608	11.2472	5.26308	0.00447214	2.4659	0.726474	0.95669	0.0266529	0.00447214
		Validation 1	32	33	234	14	0.88	49.2308	94.3548	84.984	0.499334	0.88
		Validation 2	35	37	235	6	0.89	48.6111	97.5104	86.262	0.57531	0.89
		Validation 3	37	40	219	17	0.83	48.0519	92.7966	81.7891	0.46562	0.83
		Validation 4	42	41	224	6	0.92	50.6024	97.3913	84.984	0.587955	0.92
		Validation 5	32	38	237	6	0.88	45.7143	97.5309	85.9425	0.551736	0.88
		Avg	35.6	37.8	229.8	9.8	0.88	48.4421	95.9168	84.7923	0.535991	0.88
		SD	4.15933	3.11448	7.85493	5.31037	0.0324037	1.79657	2.20761	1.77309	0.0519373	0.0324037
		Test 1	42	40	222	9	0.9	51.2195	96.1039	84.345	0.563447	0.9
		Test 2	26	39	240	8	0.86	40	96.7742	84.984	0.479385	0.86
		Test 3	40	20	240	13	0.9	66.6667	94.8617	89.4569	0.645783	0.9
		Test 4	23	49	235	6	0.79	31.9444	97.5104	82.4281	0.427536	0.79
		Test 5	45	30	232	6	0.93	60	97.479	88.4984	0.664343	0.93
		Avg	35.2	35.6	233.8	8.4	0.876	49.9661	96.5458	85.9425	0.556099	0.876
		SD	9.98499	11.0136	7.42967	2.88097	0.0541295	14.1886	1.1051	2.94554	0.102747	0.0541295
PTPN2
	Model Number		TP	FN	TN	FP	ROC-AUC	SE	SP	ACC	MCC	ROC-AUC
[1000,1000]	26	Train 1	152	38	735	2	0.98	80	99.7286	95.685	0.864718	0.98
	27	Train 2	162	42	712	11	0.98	79.4118	98.4786	94.2826	0.828245	0.98
0.4	28	Train 3	175	35	708	9	0.98	83.3333	98.7448	95.2535	0.861377	0.98
0.001	29	Train 4	179	34	710	4	0.99	84.0376	99.4398	95.9008	0.882258	0.99
100	30	Train 5	174	36	708	9	0.98	82.8571	98.7448	95.1456	0.858139	0.98
		Avg	168.4	37	714.6	7	0.982	81.928	99.0273	95.2535	0.858947	0.982
		SD	11.149	3.16228	11.5239	3.80789	0.00447214	2.08189	0.529802	0.624371	0.019531	0.00447214
		Validation 1	44	29	232	4	0.92	60.274	98.3051	89.3204	0.68694	0.92
		Validation 2	52	18	233	6	0.94	74.2857	97.4895	92.233	0.769435	0.94
		Validation 3	48	10	244	7	0.95	82.7586	97.2112	94.4984	0.816354	0.95
		Validation 4	49	13	236	11	0.94	79.0323	95.5466	92.233	0.755065	0.94
		Validation 5	52	14	239	4	0.97	78.7879	98.3539	94.1748	0.820749	0.97
		Avg	49	16.8	236.8	6.4	0.944	75.0277	97.3812	92.4919	0.769709	0.944
		SD	3.31662	7.39594	4.86826	2.88097	0.0181659	8.77732	1.14086	2.06461	0.0544198	0.0181659
		Test 1	62	14	228	5	0.94	81.5789	97.8541	93.8511	0.83012	0.94
		Test 2	35	30	243	1	0.94	53.8462	99.5902	89.9676	0.678821	0.94
		Test 3	41	30	234	4	0.95	57.7465	98.3193	88.9968	0.668663	0.95
		Test 4	33	31	242	3	0.89	51.5625	98.7755	88.9968	0.635823	0.89
		Test 5	48	15	231	15	0.94	76.1905	93.9024	90.2913	0.700929	0.94
		Avg	43.8	24	235.6	5.6	0.932	64.1849	97.6883	90.4207	0.702871	0.932
		SD	11.7346	8.68907	6.65582	5.45894	0.0238747	13.7328	2.2112	2.00282	0.0748999	0.0238747
RAF1
	Model Number		TP	FN	TN	FP	ROC-AUC	SE	SP	ACC	MCC	ROC-AUC
[1000,1000]	26	Train 1	799	8	650	4	1	99.0087	99.3884	99.1786	0.983415	1
	27	Train 2	773	18	669	1	1	97.7244	99.8507	98.6995	0.974128	1
0.4	28	Train 3	825	7	621	8	1	99.1587	98.7281	98.9733	0.979059	1
0.001	29	Train 4	809	8	638	6	1	99.0208	99.0683	99.0418	0.980573	1
100	30	Train 5	828	12	620	1	1	98.5714	99.839	99.1102	0.981953	1
		Avg	806.8	10.6	639.6	4	1	98.6968	99.3749	99.0007	0.979826	1
		SD	22.298	4.5607	20.647	3.08221	0	0.586693	0.488431	0.184932	0.00357146	0
		Validation 1	255	10	220	2	1	96.2264	99.0991	97.5359	0.950995	1
		Validation 2	241	12	226	8	0.99	95.2569	96.5812	95.8932	0.917916	0.99
		Validation 3	247	7	228	5	1	97.2441	97.8541	97.5359	0.950677	1
		Validation 4	259	5	216	7	1	98.1061	96.861	97.5359	0.950365	1
		Validation 5	275	6	198	8	1	97.8648	96.1165	97.1253	0.941065	1
		Avg	255.4	8	217.6	6	0.998	96.9397	97.3024	97.1253	0.942204	0.998
		SD	12.9923	2.91548	11.9499	2.54951	0.00447214	1.18842	1.18889	0.711315	0.0142026	0.00447214
		Test 1	266	13	205	3	0.99	95.3405	98.5577	96.7146	0.934085	0.99
		Test 2	292	15	178	2	1	95.114	98.8889	96.5092	0.927672	1
		Test 3	260	5	208	14	1	98.1132	93.6937	96.0986	0.921743	1
		Test 4	264	6	207	10	0.99	97.7778	95.3917	96.7146	0.933513	0.99
		Test 5	218	12	252	5	0.99	94.7826	98.0545	96.5092	0.930245	0.99
		Avg	260	10.2	210	6.8	0.994	96.2256	96.9173	96.5092	0.929452	0.994
		SD	26.6458	4.43847	26.5801	5.06952	0.00547723	1.58695	2.26883	0.251488	0.00502976	0.00547723
RARA
	Model Number		TP	FN	TN	FP	ROC-AUC	SE	SP	ACC	MCC	ROC-AUC
[1000,1000]	26	Train 1	144	61	1956	2	0.98	70.2439	99.8979	97.0874	0.818899	0.98
	27	Train 2	129	70	1964	0	0.99	64.8241	100	96.7638	0.791159	0.99
0.2	28	Train 3	169	50	1939	5	0.98	77.1689	99.7428	97.4572	0.853043	0.98
0.001	29	Train 4	150	63	1949	1	0.98	70.4225	99.9487	97.0411	0.822811	0.98
100	30	Train 5	180	38	1941	4	0.99	82.5688	99.7943	98.0583	0.88877	0.99
		Avg	154.4	56.4	1949.8	2.4	0.984	73.0457	99.8767	97.2816	0.834936	0.984
		SD	20.2559	12.5419	10.4259	2.07364	0.00547723	6.89232	0.106711	0.499435	0.0372376	0.00547723
		Validation 1	39	24	657	1	0.93	61.9048	99.848	96.5326	0.761792	0.93
		Validation 2	58	29	634	0	0.92	66.6667	100	95.9778	0.79844	0.92
		Validation 3	48	18	654	1	0.94	72.7273	99.8473	97.3648	0.831562	0.94
		Validation 4	46	35	638	2	0.88	56.7901	99.6875	94.8682	0.715452	0.88
		Validation 5	47	26	644	4	0.9	64.3836	99.3827	95.8391	0.75027	0.9
		Avg	47.6	26.4	645.4	1.6	0.914	64.4945	99.7531	96.1165	0.771503	0.914
		SD	6.80441	6.26897	9.93982	1.51658	0.0240832	5.88586	0.2347	0.920007	0.0447758	0.0240832
		Test 1	53	35	632	1	0.9	60.2273	99.842	95.0069	0.747026	0.9
		Test 2	46	24	650	1	0.91	65.7143	99.8464	96.5326	0.786329	0.91
		Test 3	43	28	648	2	0.93	60.5634	99.6923	95.8391	0.742172	0.93
		Test 4	37	25	657	2	0.94	59.6774	99.6965	96.2552	0.735885	0.94
		Test 5	41	24	653	3	0.86	63.0769	99.5427	96.2552	0.749201	0.86
		Avg	44	27.2	648	1.8	0.908	61.8519	99.724	95.9778	0.752122	0.908
		SD	6	4.65833	9.56556	0.83666	0.0311448	2.52224	0.12604	0.596555	0.0197942	0.0311448
RARB
	Model Number		TP	FN	TN	FP	ROC-AUC	SE	SP	ACC	MCC	ROC-AUC
[1000,1000]	26	Train 1	165	17	2002	3	0.99	90.6593	99.8504	99.0855	0.938783	0.99
	27	Train 2	171	20	1996	0	0.99	89.5288	100	99.0855	0.941491	0.99
0.2	28	Train 3	164	16	2007	0	0.98	91.1111	100	99.2684	0.950739	0.98
0.001	29	Train 4	160	13	2012	2	0.99	92.4855	99.9007	99.3141	0.952116	0.99
100	30	Train 5	166	12	2006	3	0.99	93.2584	99.8507	99.3141	0.953429	0.99
		Avg	165.2	15.6	2004.6	1.6	0.988	91.4086	99.9203	99.2135	0.947312	0.988
		SD	3.96232	3.20936	5.98331	1.51658	0.00447214	1.48031	0.0755417	0.118356	0.00668696	0.00447214
		Validation 1	53	4	671	1	0.98	92.9825	99.8512	99.3141	0.951653	0.98
		Validation 2	41	7	681	0	0.98	85.4167	100	99.0398	0.919498	0.98
		Validation 3	48	7	672	2	0.98	87.2727	99.7033	98.7654	0.908847	0.98
		Validation 4	50	17	662	0	0.95	74.6269	100	97.668	0.852986	0.95
		Validation 5	57	4	668	0	0.98	93.4426	100	99.4513	0.963776	0.98
		Avg	49.8	7.8	670.8	0.6	0.974	86.7483	99.9109	98.8477	0.919352	0.974
		SD	5.97495	5.35724	6.90652	0.894427	0.0134164	7.62653	0.132754	0.710133	0.0433928	0.0134164
		Test 1	54	5	667	3	0.98	91.5254	99.5522	98.9026	0.925237	0.98
		Test 2	47	12	669	1	0.96	79.661	99.8507	98.2167	0.874381	0.96
		Test 3	56	7	665	1	0.98	88.8889	99.8498	98.9026	0.928749	0.98
		Test 4	50	8	671	0	0.98	86.2069	100	98.9026	0.922991	0.98
		Test 5	47	12	669	1	0.92	79.661	99.8507	98.2167	0.874381	0.92
		Avg	50.8	8.8	668.2	1.2	0.964	85.1886	99.8207	98.6283	0.905148	0.964
		SD	4.08656	3.11448	2.28035	1.09545	0.0260768	5.385	0.163459	0.375667	0.0281612	0.0260768
ROCK1
	Model Number		TP	FN	TN	FP	ROC-AUC	SE	SP	ACC	MCC	ROC-AUC
[1000,1000]	26	Train 1	768	6	651	21	1	99.2248	96.875	98.1328	0.962623	1
	27	Train 2	760	8	658	20	1	98.9583	97.0501	98.0636	0.961215	1
0.4	28	Train 3	792	7	624	23	1	99.1239	96.4451	97.9253	0.958185	1
0.001	29	Train 4	731	17	680	18	1	97.7273	97.4212	97.5795	0.951531	1
100	30	Train 5	797	5	614	30	1	99.3766	95.3416	97.5795	0.951405	1
		Avg	769.6	8.6	645.4	22.4	1	98.8822	96.6266	97.8562	0.956992	1
		SD	26.6327	4.82701	26.6045	4.61519	0	0.663296	0.79947	0.263339	0.00529169	0
		Validation 1	229	8	224	21	0.98	96.6245	91.4286	93.9834	0.881024	0.98
		Validation 2	237	16	214	15	0.98	93.6759	93.4498	93.5685	0.871084	0.98
		Validation 3	253	3	203	23	0.99	98.8281	89.823	94.6058	0.894273	0.99
		Validation 4	266	16	189	11	0.98	94.3262	94.5	94.3983	0.885246	0.98
		Validation 5	241	12	206	23	0.99	95.2569	89.9563	92.7386	0.854978	0.99
		Avg	245.2	11	207.2	18.6	0.984	95.7423	91.8315	93.8589	0.877321	0.984
		SD	14.4983	5.56776	13.0269	5.36656	0.00547723	2.05009	2.0888	0.742263	0.0150168	0.00547723
		Test 1	275	7	184	16	0.99	97.5177	92	95.2282	0.901749	0.99
		Test 2	262	10	190	20	0.99	96.3235	90.4762	93.7759	0.87352	0.99
		Test 3	227	11	225	19	0.98	95.3782	92.2131	93.7759	0.876033	0.98
		Test 4	244	19	202	17	0.98	92.7757	92.2374	92.5311	0.849512	0.98
		Test 5	230	8	222	22	0.98	96.6387	90.9836	93.7759	0.877069	0.98
		Avg	247.6	11	204.6	18.8	0.984	95.7267	91.5821	93.8174	0.875577	0.984
		SD	20.647	4.74342	18.4608	2.38747	0.00547723	1.81836	0.803667	0.955258	0.0185135	0.00547723
RPS6KA5
	Model Number		TP	FN	TN	FP	ROC-AUC	SE	SP	ACC	MCC	ROC-AUC
[1000,1000]	26	Train 1	118	14	624	0	1	89.3939	100	98.1481	0.935052	1
	27	Train 2	118	21	617	0	0.99	84.8921	100	97.2222	0.906079	0.99
0.4	28	Train 3	132	6	618	0	1	95.6522	100	99.2063	0.973306	1
0.001	29	Train 4	114	25	617	0	0.99	82.0144	100	96.6931	0.88781	0.99
100	30	Train 5	129	11	616	0	1	92.1429	100	98.545	0.951453	1
		Avg	122.2	15.4	618.4	0	0.996	88.8191	100	97.963	0.93074	0.996
		SD	7.82304	7.63544	3.20936	0	0.00547723	5.47253	0	1.00998	0.0343171	0.00547723
		Validation 1	21	21	210	0	0.95	50	100	91.6667	0.6742	0.95
		Validation 2	29	16	207	0	1	64.4444	100	93.6508	0.773438	1
		Validation 3	25	13	213	1	0.96	65.7895	99.5327	94.4444	0.768455	0.96
		Validation 4	30	10	212	0	0.98	75	100	96.0317	0.846296	0.98
		Validation 5	32	11	208	1	0.93	74.4186	99.5215	95.2381	0.824534	0.93
		Avg	27.4	14.2	210	0.4	0.964	65.9305	99.8108	94.2063	0.777385	0.964
		SD	4.39318	4.43847	2.54951	0.547723	0.0270185	10.1281	0.259037	1.67421	0.0665473	0.0270185
		Test 1	33	17	202	0	0.97	66	100	93.254	0.780235	0.97
		Test 2	25	15	212	0	0.97	62.5	100	94.0476	0.764003	0.97
		Test 3	42	6	201	3	0.95	87.5	98.5294	96.4286	0.882046	0.95
		Test 4	25	20	207	0	0.99	55.5556	100	92.0635	0.711764	0.99
		Test 5	23	18	208	3	0.96	56.0976	98.5782	91.6667	0.663418	0.96
		Avg	29.6	15.2	206	1.2	0.968	65.5306	99.4215	93.4921	0.760293	0.968
		SD	7.92465	5.44977	4.52769	1.64317	0.0148324	13.0436	0.792301	1.89482	0.0821205	0.0148324
SIRT2
	Model Number		TP	FN	TN	FP	ROC-AUC	SE	SP	ACC	MCC	ROC-AUC
[1000,1000]	26	Train 1	164	46	763	14	0.97	78.0952	98.1982	93.921	0.812125	0.97
	27	Train 2	192	31	749	15	0.98	86.0987	98.0366	95.3394	0.864261	0.98
0.4	28	Train 3	201	25	749	12	0.98	88.9381	98.4231	96.2513	0.892287	0.98
0.001	29	Train 4	183	40	756	8	0.97	82.0628	98.9529	95.1368	0.85762	0.97
100	30	Train 5	171	43	766	7	0.98	79.9065	99.0944	94.9341	0.84673	0.98
		Avg	182.2	37	756.6	11.2	0.976	83.0203	98.5411	95.1165	0.854605	0.976
		SD	15.0566	8.74643	7.82943	3.56371	0.00547723	4.45434	0.464143	0.83671	0.0291068	0.00547723
		Validation 1	40	18	264	7	0.96	68.9655	97.417	92.4012	0.722901	0.96
		Validation 2	55	13	243	18	0.94	80.8824	93.1034	90.5775	0.721011	0.94
		Validation 3	52	27	238	12	0.9	65.8228	95.2	88.1459	0.65851	0.9
		Validation 4	42	20	258	9	0.93	67.7419	96.6292	91.1854	0.695561	0.93
		Validation 5	44	37	242	6	0.91	54.321	97.5806	86.9301	0.62282	0.91
		Avg	46.6	23	249	10.4	0.928	67.5467	95.9861	89.848	0.684161	0.928
		SD	6.54217	9.30054	11.3137	4.82701	0.0238747	9.45757	1.86623	2.25006	0.0430388	0.0238747
		Test 1	78	15	225	11	0.96	83.871	95.339	92.0973	0.802928	0.96
		Test 2	47	23	252	7	0.9	67.1429	97.2973	90.8815	0.71202	0.9
		Test 3	31	25	265	8	0.89	55.3571	97.0696	89.9696	0.609533	0.89
		Test 4	39	37	247	6	0.95	51.3158	97.6285	86.9301	0.600348	0.95
		Test 5	34	32	256	7	0.92	51.5152	97.3384	88.1459	0.592322	0.92
		Avg	45.8	26.4	249	7.8	0.924	61.8404	96.9345	89.6049	0.66343	0.924
		SD	18.9921	8.47349	14.9499	1.92354	0.0304959	13.9003	0.913819	2.07712	0.0918712	0.0304959
SIRT3
	Model Number		TP	FN	TN	FP	ROC-AUC	SE	SP	ACC	MCC	ROC-AUC
[1000,1000]	26	Train 1	53	23	658	1	0.98	69.7368	99.8483	96.7347	0.812073	0.98
	27	Train 2	67	20	640	8	0.98	77.0115	98.7654	96.1905	0.808689	0.98
0.4	28	Train 3	91	18	616	10	0.99	83.4862	98.4026	96.1905	0.845317	0.99
0.001	29	Train 4	76	17	632	10	0.99	81.7204	98.4424	96.3265	0.829106	0.99
100	30	Train 5	68	17	642	8	0.98	80	98.7692	96.5986	0.827319	0.98
		Avg	71	19	637.6	7.4	0.984	78.391	98.8456	96.4082	0.824501	0.984
		SD	13.9104	2.54951	15.3232	3.71484	0.00547723	5.3952	0.586613	0.247155	0.0147218	0.00547723
		Validation 1	13	14	218	0	0.93	48.1481	100	94.2857	0.672627	0.93
		Validation 2	21	9	210	5	0.95	70	97.6744	94.2857	0.720271	0.95
		Validation 3	24	3	212	6	0.95	88.8889	97.2477	96.3265	0.822845	0.95
		Validation 4	22	9	211	3	0.92	70.9677	98.5981	95.102	0.764016	0.92
		Validation 5	35	4	204	2	0.99	89.7436	99.0291	97.551	0.907012	0.99
		Avg	23	7.8	211	3.2	0.948	73.5497	98.5099	95.5102	0.777354	0.948
		SD	7.90569	4.43847	5	2.38747	0.0268328	17.0443	1.09418	1.41392	0.0912206	0.0268328
		Test 1	12	36	196	1	0.97	25	99.4924	84.898	0.43368	0.97
		Test 2	13	21	209	2	0.96	38.2353	99.0521	90.6122	0.537692	0.96
		Test 3	12	3	225	5	0.92	80	97.8261	96.7347	0.734248	0.92
		Test 4	12	15	217	1	0.87	44.4444	99.5413	93.4694	0.614478	0.87
		Test 5	13	14	218	0	0.93	48.1481	100	94.2857	0.672627	0.93
		Avg	12.4	17.8	213	1.8	0.93	47.1656	99.1824	92	0.598545	0.93
		SD	0.547723	12.0706	11.068	1.92354	0.03937	20.3564	0.829143	4.53227	0.117304	0.03937
SRC
	Model Number		TP	FN	TN	FP	ROC-AUC	SE	SP	ACC	MCC	ROC-AUC
[1000,1000]	26	Train 1	1589	19	856	77	0.99	98.8184	91.7471	96.222	0.918766	0.99
	27	Train 2	1624	32	843	42	0.99	98.0676	95.2542	97.0878	0.935715	0.99
0.4	28	Train 3	1609	28	848	56	0.99	98.2896	93.8053	96.6942	0.927651	0.99
0.001	29	Train 4	1530	48	929	34	0.99	96.9582	96.4694	96.7729	0.9317	0.99
100	30	Train 5	1532	51	917	41	0.99	96.7783	95.7203	96.3794	0.923115	0.99
		Avg	1576.8	35.6	878.6	50	0.99	97.7824	94.5992	96.6312	0.92739	0.99
		SD	43.6199	13.5757	41.0159	17.0734	0	0.88027	1.86738	0.340366	0.00671932	0
		Validation 1	525	25	248	49	0.97	95.4545	83.5017	91.2633	0.806137	0.97
		Validation 2	488	51	271	37	0.97	90.538	87.987	89.6104	0.778163	0.97
		Validation 3	548	19	243	37	0.97	96.649	86.7857	93.3884	0.849159	0.97
		Validation 4	497	48	271	31	0.96	91.1927	89.7351	90.673	0.799994	0.96
		Validation 5	513	40	264	30	0.97	92.7667	89.7959	91.7355	0.819376	0.97
		Avg	514.2	36.6	259.4	36.8	0.968	93.3202	87.5611	91.3341	0.810566	0.968
		SD	23.6791	14.0819	13.1263	7.56307	0.00447214	2.65564	2.59722	1.39595	0.0262125	0.00447214
		Test 1	523	23	254	47	0.97	95.7875	84.3854	91.7355	0.817956	0.97
		Test 2	467	42	293	45	0.96	91.7485	86.6864	89.7285	0.785542	0.96
		Test 3	474	26	296	51	0.97	94.8	85.3026	90.9091	0.8115	0.97
		Test 4	535	46	245	21	0.98	92.0826	92.1053	92.0897	0.822801	0.98
		Test 5	518	50	255	24	0.97	91.1972	91.3978	91.2633	0.808687	0.97
		Avg	503.4	37.4	268.6	37.6	0.97	93.1232	87.9755	91.1452	0.809297	0.97
		SD	30.762	12.1573	23.9854	13.9929	0.00707107	2.03669	3.55185	0.910699	0.0143776	0.00707107
TACR2
	Model Number		TP	FN	TN	FP	ROC-AUC	SE	SP	ACC	MCC	ROC-AUC
[1000,1000]	26	Train 1	476	45	1151	2	0.99	91.3628	99.8265	97.1924	0.934755	0.99
	27	Train 2	445	66	1160	3	0.99	87.0841	99.742	95.8781	0.903164	0.99
0.4	28	Train 3	525	44	1103	2	0.99	92.2671	99.819	97.2521	0.939171	0.99
0.001	29	Train 4	498	60	1115	1	0.99	89.2473	99.9104	96.356	0.918838	0.99
100	30	Train 5	437	43	1192	2	0.99	91.0417	99.8325	97.3118	0.934324	0.99
		Avg	476.2	51.6	1144.2	2	0.99	90.2006	99.8261	96.7981	0.92605	0.99
		SD	36.6292	10.6442	35.8148	0.707107	0	2.0585	0.0597117	0.645604	0.0149345	0
		Validation 1	157	20	379	2	0.97	88.7006	99.4751	96.0573	0.909102	0.97
		Validation 2	153	24	380	1	0.97	86.4407	99.7375	95.5197	0.897213	0.97
		Validation 3	145	15	396	2	0.95	90.625	99.4975	96.9534	0.925242	0.95
		Validation 4	154	25	377	2	0.98	86.0335	99.4723	95.1613	0.889337	0.98
		Validation 5	151	21	380	6	0.97	87.7907	98.4456	95.1613	0.885576	0.97
		Avg	152	21	382.4	2.6	0.968	87.9181	99.3256	95.7706	0.901294	0.968
		SD	4.47214	3.937	7.70065	1.94936	0.0109545	1.85001	0.504356	0.756094	0.0161332	0.0109545
		Test 1	155	23	373	7	0.97	87.0787	98.1579	94.6237	0.875231	0.97
		Test 2	155	33	370	0	0.97	82.4468	100	94.086	0.870032	0.97
		Test 3	125	22	411	0	0.97	85.034	100	96.0573	0.898407	0.97
		Test 4	113	26	418	1	0.96	81.295	99.7613	95.1613	0.869475	0.96
		Test 5	205	19	328	6	0.98	91.5179	98.2036	95.5197	0.906959	0.98
		Avg	150.6	24.6	380	2.8	0.97	85.4745	99.2246	95.0896	0.884021	0.97
		SD	35.5921	5.31977	36.256	3.42053	0.00707107	4.05971	0.957979	0.76664	0.0174474	0.00707107
TBXA2R
	Model Number		TP	FN	TN	FP	ROC-AUC	SE	SP	ACC	MCC	ROC-AUC
[1000,1000]	26	Train 1	525	70	1140	8	0.99	88.2353	99.3031	95.525	0.90089	0.99
	27	Train 2	580	47	1100	16	0.99	92.504	98.5663	96.3855	0.921378	0.99
0.4	28	Train 3	575	32	1118	18	0.99	94.7282	98.4155	97.1314	0.936614	0.99
0.001	29	Train 4	578	30	1099	36	0.99	95.0658	96.8282	96.2134	0.916866	0.99
100	30	Train 5	533	47	1149	14	0.99	91.8966	98.7962	96.5003	0.92091	0.99
		Avg	558.2	45.2	1121.2	18.4	0.99	92.486	98.3819	96.3511	0.919332	0.99
		SD	26.8645	16.0219	22.7969	10.5262	0	2.74312	0.931326	0.577441	0.0127624	0
		Validation 1	167	27	379	8	0.98	86.0825	97.9328	93.9759	0.86364	0.98
		Validation 2	167	18	384	12	0.98	90.2703	96.9697	94.8365	0.880257	0.98
		Validation 3	190	14	364	13	0.97	93.1373	96.5517	95.3528	0.897906	0.97
		Validation 4	206	10	340	25	0.99	95.3704	93.1507	93.9759	0.874138	0.99
		Validation 5	169	23	383	6	0.99	88.0208	98.4576	95.0086	0.886648	0.99
		Avg	179.8	18.4	370	12.8	0.982	90.5762	96.6125	94.6299	0.880518	0.982
		SD	17.5699	6.80441	18.5876	7.39594	0.0083666	3.75367	2.07744	0.625332	0.0128993	0.0083666
		Test 1	162	27	379	8	0.98	85.7143	97.9328	93.9236	0.861093	0.98
		Test 2	168	22	385	6	0.98	88.4211	98.4655	95.1807	0.889909	0.98
		Test 3	180	11	370	20	0.98	94.2408	94.8718	94.6644	0.881071	0.98
		Test 4	161	17	380	23	0.97	90.4494	94.2928	93.1153	0.839766	0.97
		Test 5	198	32	344	7	0.96	86.087	98.0057	93.2874	0.860607	0.96
		Avg	173.8	21.8	371.6	12.8	0.974	88.9825	96.7137	94.0343	0.866489	0.974
		SD	15.4984	8.228	16.3493	8.04363	0.00894427	3.50652	1.96708	0.884005	0.0196149	0.00894427
TEK
	Model Number		TP	FN	TN	FP	ROC-AUC	SE	SP	ACC	MCC	ROC-AUC
[1000,1000]	26	Train 1	462	14	671	5	1	97.0588	99.2604	98.3507	0.966019	1
	27	Train 2	449	12	675	16	0.99	97.397	97.6845	97.5694	0.949469	0.99
0.4	28	Train 3	461	13	670	8	1	97.2574	98.8201	98.1771	0.96234	1
0.001	29	Train 4	453	16	679	4	1	96.5885	99.4143	98.2639	0.964118	1
100	30	Train 5	482	16	647	7	1	96.7871	98.9297	98.0035	0.959358	1
		Avg	461.4	14.2	668.4	8	0.998	97.0178	98.8218	98.0729	0.960261	0.998
		SD	12.7397	1.78885	12.482	4.74342	0.00447214	0.331798	0.679797	0.309349	0.0065126	0.00447214
		Validation 1	133	12	235	4	0.98	91.7241	98.3264	95.8333	0.911298	0.98
		Validation 2	145	8	217	14	0.98	94.7712	93.9394	94.2708	0.881734	0.98
		Validation 3	146	11	217	10	0.97	92.9936	95.5947	94.5312	0.886767	0.97
		Validation 4	148	16	217	3	0.98	90.2439	98.6364	95.0521	0.900061	0.98
		Validation 5	147	8	224	5	0.99	94.8387	97.8166	96.6146	0.929583	0.99
		Avg	143.8	11	222	7.2	0.98	92.9143	96.8627	95.2604	0.901889	0.98
		SD	6.14003	3.31662	7.87401	4.65833	0.00707107	1.9815	2.02186	0.963894	0.0193242	0.00707107
		Test 1	151	16	212	5	0.97	90.4192	97.6959	94.5312	0.889423	0.97
		Test 2	168	6	202	8	0.98	96.5517	96.1905	96.3542	0.92656	0.98
		Test 3	146	11	221	6	0.98	92.9936	97.3568	95.5729	0.908296	0.98
		Test 4	143	12	219	10	0.99	92.2581	95.6332	94.2708	0.8808	0.99
		Test 5	127	8	235	14	0.98	94.0741	94.3775	94.2708	0.876112	0.98
		Avg	147	10.6	217.8	8.6	0.98	93.2593	96.2508	95	0.896238	0.98
		SD	14.7817	3.84708	12.1532	3.57771	0.00707107	2.27175	1.34218	0.928048	0.0209443	0.00707107
